# Supplementary material for: Dietary Factors and Breast Cancer Prognosis among Breast Cancer Survivors: A Systematic Review and Meta-Analysis of Cohort Studies
Source: MDPI journal article supplement (doi:10.3390/cancers13215329), 2021-10-23
Supplement: s1 [file s1]

# Supplementary Materials: Dietary Factors and Breast Cancer Prognosis among Breast Cancer Survivors: A Systematic Review and Meta-Analysis of Cohort Studies

Sin-Hye Park <sup>1,2</sup>, Tung Hoang <sup>2</sup> and Jeongseon Kim <sup>2,\*</sup>

Sin-Hye Park, Tung Hoang and Jeongseon Kim

**Table S1.** Baseline characteristic of studies included in the final systematic review and meta-analysis.

| Study         | Project (follow-up period)                                           | Countries | Diagnostic    | Menopausal status                     | BC stage | Age             | Sample size (n)                | Exposures                                       | Outcomes                         | HR/RR (95% CIs)     | Covariates                                                                           |
|---------------|----------------------------------------------------------------------|-----------|---------------|---------------------------------------|----------|-----------------|--------------------------------|-------------------------------------------------|----------------------------------|---------------------|--------------------------------------------------------------------------------------|
| 1991 Ewertz M | Danish Breast Cancer Cooperative Group (DBCG;1983-1984 through 1990) | Denmark   | Prediagnostic | Premenopausal<br>1+<br>Postmenopausal | I-III    | < 70 years      | 1,744 (BC-specific death =805) | Fat consumption (Q4 vs. Q1)                     | Breast cancer-specific mortality | 0.96 (0.75 to 1.22) | Demographic, clinical, reproductive, anthropometric, dietary, age, area of residence |
|               |                                                                      |           |               |                                       |          |                 |                                | Alcohol consumption (> 121 g/week vs. 0 g/week) |                                  | 1.26 (0.90 to 1.74) |                                                                                      |
|               |                                                                      |           |               |                                       |          |                 |                                | Fat (>108 g/day vs. <56 g/day)                  |                                  | 1.40 (0.66 to 2.96) |                                                                                      |
|               |                                                                      |           |               |                                       |          |                 |                                | Protein (>103 g/day vs. <59 g/day)              |                                  | 0.74 (0.34 to 1.66) |                                                                                      |
| 1993 Rohan TE | South Australian Central Cancer Registry (SACCR; median 5.5 years)   | Australia | Prediagnostic | Premenopausal<br>1+<br>Postmenopausal | -        | Mean 55.1 years | 412 (BC-specific death =112)   | Carbohydrate (>256 g/day vs. <144 g/day)        | Breast cancer-specific mortality | 0.98 (0.53 to 1.81) | Energy, age at menarche, quetelet index                                              |
|               |                                                                      |           |               |                                       |          |                 |                                | Saturated fat (> 45 g/day vs. <20 g/day)        |                                  | 1.65 (0.73 to 3.75) |                                                                                      |
|               |                                                                      |           |               |                                       |          |                 |                                | Monounsaturated fat (>37 g/day vs. <17 g/day)   |                                  | 1.33 (0.56 to 3.13) |                                                                                      |

1.63  
(0.87 to 3.03)

|             |                                                              |           |               |                                      |                |                       |                                       | Retinol (>1,555<br>µg/day vs. <250<br>µg/day)                       |                                     | 1.05<br>(0.56 to 1.95) |                                                               |
|-------------|--------------------------------------------------------------|-----------|---------------|--------------------------------------|----------------|-----------------------|---------------------------------------|---------------------------------------------------------------------|-------------------------------------|------------------------|---------------------------------------------------------------|
|             |                                                              |           |               |                                      |                |                       |                                       | beta-Carotene<br>(>8,058 µg/day<br>vs. 3,051<br>µg/day)             |                                     | 0.96<br>(0.53 to 1.73) |                                                               |
|             |                                                              |           |               |                                      |                |                       |                                       | Vitamin C (>234<br>mg/day vs. <71<br>mg/day)                        |                                     | 0.80<br>(0.47 to 1.38) |                                                               |
|             |                                                              |           |               |                                      |                |                       |                                       | Alcohol<br>consumption                                              |                                     | 1.61<br>(1.03 to 2.52) |                                                               |
| Study       | Project (follow-up period)                                   | Countries | Diagnostic    | Menopausal<br>status                 | BC stage       | Age                   | Sample<br>size (n)                    | Exposures                                                           | Outcomes                            | HR/RR<br>(95% CIs)     | Covariates                                                    |
|             |                                                              |           |               |                                      |                |                       |                                       | (>10 g/day vs. 0<br>g/day)                                          |                                     |                        |                                                               |
|             |                                                              |           |               |                                      |                |                       |                                       | Saturated fat<br>(>42.94 g/day vs.<br><26.36 g/day)                 |                                     | 1.91<br>(0.73 to 5.02) |                                                               |
|             |                                                              |           |               |                                      |                |                       |                                       | Saturated<br>fat/total fat<br>(>41% vs.<br><35.7%)                  |                                     | 1.93<br>(1.00 to 3.74) |                                                               |
| 1994 Jain M | National Breast Screening<br>Study (NBSS; mean 7.7<br>years) | Canada    | Prediagnostic | Premenopausal<br>+<br>Postmenopausal | Invasive<br>BC | Mean<br>49.8<br>years | 673 (BC-<br>specific<br>death<br>=76) | Vitamin A<br>supplements<br>(>131,135 IU vs.<br><6,489 IU)          | Breast cancer-specific<br>mortality | 0.56<br>(0.28 to 1.09) | Total energy, age<br>at diagnosis,<br>smoking, body<br>weight |
|             |                                                              |           |               |                                      |                |                       |                                       | beta-Carotene<br>(>7,690 IU vs.<br><3,607 IU)                       |                                     | 0.48<br>(0.23 to 0.99) |                                                               |
|             |                                                              |           |               |                                      |                |                       |                                       | Vitamin C<br>supplements<br>(>210.3 mg/day<br>vs. <110.7<br>mg/day) |                                     | 0.43<br>(0.21 to 0.86) |                                                               |

|       |                            |           |            |                   |          |     |                         | Vitamin E supplements (>24.33 mg/day vs. <13.73 mg/day) |          | 0.55<br>(0.26 to 1.17) |            |
|-------|----------------------------|-----------|------------|-------------------|----------|-----|-------------------------|---------------------------------------------------------|----------|------------------------|------------|
|       |                            |           |            |                   |          |     |                         | Thiamin supplements (>1.49 mg/day vs. <0.99 mg/day)     |          | 0.57<br>(0.26 to 1.25) |            |
|       |                            |           |            |                   |          |     |                         | Calcium supplements (>1,005.6 mg/day vs. <541.2 mg/day) |          | 0.66<br>(0.33 to 1.31) |            |
|       |                            |           |            | Premenopausal     |          |     | 250 (BC-specific death) | Saturated fat (>42.94 g/day vs. <26.36 g/day)           |          | 1.14<br>(0.75 to 1.73) |            |
| Study | Project (follow-up period) | Countries | Diagnostic | Menopausal status | BC stage | Age | Sample size (n)         | Exposures                                               | Outcomes | HR/RR (95% CIs)        | Covariates |
|       |                            |           |            |                   |          |     |                         | Saturated fat/total fat (>41% vs. <35.7%)               |          | 1.25<br>(0.47 to 3.31) |            |
|       |                            |           |            |                   |          |     | =26)                    | Vitamin A supplements (4000 IU/day)                     |          | 0.78<br>(0.54 to 1.17) |            |
|       |                            |           |            |                   |          |     |                         | beta-Carotene (2000 IU/day)                             |          | 0.87<br>(0.65 to 1.18) |            |
|       |                            |           |            |                   |          |     |                         | Vitamin C supplements (100 mg/day)                      |          | 0.54<br>(0.30 to 0.98) |            |

|       |                            |           |            |                   |          |     |                 | Vitamin E supplements (10 mg/day)             | 0.64<br>(0.33 to 1.26) |                        |            |
|-------|----------------------------|-----------|------------|-------------------|----------|-----|-----------------|-----------------------------------------------|------------------------|------------------------|------------|
|       |                            |           |            |                   |          |     |                 | Thiamin supplements (10 mg/day)               | 1.20<br>(1.07 to 3.66) |                        |            |
|       |                            |           |            |                   |          |     |                 | Calcium supplements (400 mg/day)              | 0.93<br>(0.58 to 1.50) |                        |            |
|       |                            |           |            |                   |          |     |                 | Saturated fat (>42.94 g/day vs. <26.36 g/day) | 1.27<br>(0.94 to 1.73) |                        |            |
|       |                            |           |            |                   |          |     |                 | Saturated fat/total fat (>41% vs. <35.7%)     | 2.53<br>(1.20 to 5.33) |                        |            |
|       |                            |           |            |                   |          |     |                 | Vitamin A supplements (4000 IU/day)           | 0.84<br>(0.67 to 1.06) |                        |            |
|       |                            |           |            |                   |          |     |                 | beta-Carotene (2000 IU/day)                   | 0.84<br>(0.68 to 1.03) |                        |            |
|       |                            |           |            |                   |          |     |                 | Vitamin C supplements (100 mg/day)            | 0.74<br>(0.50 to 1.11) |                        |            |
|       |                            |           |            |                   |          |     |                 | Vitamin E supplements (10 mg/day)             | 0.76<br>(0.51 to 1.13) |                        |            |
| Study | Project (follow-up period) | Countries | Diagnostic | Menopausal status | BC stage | Age | Sample size (n) | Exposures                                     | Outcomes               | HR/RR (95% CIs)        | Covariates |
|       |                            |           |            |                   |          |     |                 | Thiamin supplements (10 mg/day)               |                        | 0.62<br>(0.36 to 1.05) |            |

|                |                                                                         |               |                                |                |             |                 |                                                  |                                  |                                  |                     |                                                                                                 |
|----------------|-------------------------------------------------------------------------|---------------|--------------------------------|----------------|-------------|-----------------|--------------------------------------------------|----------------------------------|----------------------------------|---------------------|-------------------------------------------------------------------------------------------------|
|                |                                                                         |               |                                |                |             |                 |                                                  | Calcium supplements (400 mg/day) | 0.71 (0.49 to 1.05)              |                     |                                                                                                 |
|                |                                                                         |               |                                |                |             |                 |                                                  | Red meat                         | 1.43 (0.74 to 2.79)              |                     |                                                                                                 |
|                |                                                                         |               |                                |                |             |                 |                                                  | Butter/margarin e/lard           | Breast cancer-specific mortality | 1.16 (0.86 to 1.58) |                                                                                                 |
|                |                                                                         |               |                                | Premenopausal  |             |                 |                                                  | Beer                             |                                  | 1.58 (1.00 to 2.78) |                                                                                                 |
|                |                                                                         |               |                                | Postmenopausal |             |                 |                                                  | Red meat                         |                                  | 1.12 (0.66 to 1.89) |                                                                                                 |
|                |                                                                         |               |                                |                |             |                 |                                                  | Butter/margarin e lard           | Breast cancer recurrence         | 1.30 (1.03 to 1.64) |                                                                                                 |
|                |                                                                         |               |                                |                |             |                 |                                                  | Beer                             |                                  | 1.41 (1.02 to 1.97) |                                                                                                 |
| 1998 Hebert JR | Memorial Sloan-Kettering Cancer Center (MSK-CC; 1985-1986 through 1991) | United States | Prediagnostic                  |                | I-III A     | Mean 52.2 years | 471 (BC-specific death =73; BC recurrence=109)   | Meat/liver/bacon                 |                                  | 2.60 (0.96 to 7.03) | Tumor stage, hormone receptor status, age, BMI                                                  |
|                |                                                                         |               |                                |                |             |                 |                                                  | Butter/margarin e/lard           | Breast cancer-specific mortality | 1.03 (0.61 to 1.76) |                                                                                                 |
|                |                                                                         |               |                                | Premenopausal  |             |                 |                                                  | Beer                             |                                  | 2.33 (1.35 to 4.00) |                                                                                                 |
|                |                                                                         |               |                                |                |             |                 |                                                  | Meat/liver/bacon                 |                                  | 1.93 (0.89 to 4.15) |                                                                                                 |
|                |                                                                         |               |                                |                |             |                 |                                                  | Butter/margarin e/lard           | Breast cancer recurrence         | 1.67 (1.17 to 2.39) |                                                                                                 |
|                |                                                                         |               |                                |                |             |                 |                                                  | Beer                             |                                  | 1.58 (1.15 to 2.17) |                                                                                                 |
|                |                                                                         |               |                                |                |             |                 |                                                  | Poultry (Q4 vs. Q1)              |                                  | 0.70 (0.50 to 0.97) | Age, diet interval, calender year of diagnosis, BMI, oral contraceptive use, menopausal status, |
| 1999 Holmes MD | Nurses' Health Study (NHS; mean 13.1 years)                             | United States | Prediagnostic + Postdiagnostic | Premenopausal  | Invasive BC | Mean 54 years   | 1,982 (Total death =378; BC-specific death =326) | Dairy (Q4 vs. Q1)                | All-cause mortality              | 0.72 (0.52 to 1.00) |                                                                                                 |
|                |                                                                         |               |                                |                |             |                 |                                                  | Fish (Q4 vs. Q1)                 |                                  | 0.80 (0.60 to 1.07) |                                                                                                 |
|                |                                                                         |               |                                |                |             |                 |                                                  | Vegetables (Q4 vs. Q1)           |                                  | 0.81 (0.59 to 1.11) |                                                                                                 |

| Study | Project (follow-up period) | Countries | Diagnostic | Menopausal status | BC stage | Age | Sample size (n) | Fruit (Q4 vs. Q1)                 |          | 1.07<br>(0.77 to 1.49) | Covariates                                                                                                                       |
|-------|----------------------------|-----------|------------|-------------------|----------|-----|-----------------|-----------------------------------|----------|------------------------|----------------------------------------------------------------------------------------------------------------------------------|
|       |                            |           |            |                   |          |     |                 | Exposures                         | Outcomes | HR/RR<br>(95% CIs)     |                                                                                                                                  |
|       |                            |           |            |                   |          |     |                 | Grain<br>(Q4 vs. Q1)              |          | 1.27<br>(0.90 to 1.79) |                                                                                                                                  |
|       |                            |           |            |                   |          |     |                 | Red meat<br>(Q4 vs. Q1)           |          | 1.06<br>(0.76 to 1.49) |                                                                                                                                  |
|       |                            |           |            |                   |          |     |                 | Fiber<br>(Q5 vs. Q1)              |          | 0.69<br>(0.50 to 0.97) |                                                                                                                                  |
|       |                            |           |            |                   |          |     |                 | Protein<br>(Q5 vs. Q1)            |          | 0.65<br>(0.47 to 0.88) |                                                                                                                                  |
|       |                            |           |            |                   |          |     |                 | Vitamin A<br>(Q5 vs. Q1)          |          | 0.78<br>(0.58 to 1.06) |                                                                                                                                  |
|       |                            |           |            |                   |          |     |                 | Lutein/zeaxanthin<br>(Q5 vs. Q1)  |          | 0.87<br>(0.62 to 1.21) | postmenopausal hormone use, smoking, age at first birth and parity, number of metastatic lymph nodes, tumor size, caloric intake |
|       |                            |           |            |                   |          |     |                 | Calcium<br>(Q5 vs. Q1)            |          | 0.66<br>(0.48 to 0.91) |                                                                                                                                  |
|       |                            |           |            |                   |          |     |                 | Omega-3 fatty acids (Q5 vs. Q1)   |          | 0.77<br>(0.56 to 1.07) |                                                                                                                                  |
|       |                            |           |            |                   |          |     |                 | 18:2 trans fatty acid (Q5 vs. Q1) |          | 1.45<br>(1.06 to 1.99) |                                                                                                                                  |
|       |                            |           |            |                   |          |     |                 | alpha-Carotene<br>(Q5 vs. Q1)     |          | 0.93<br>(0.67 to 1.28) |                                                                                                                                  |
|       |                            |           |            |                   |          |     |                 | beta-Carotene<br>(Q5 vs. Q1)      |          | 0.92<br>(0.68 to 1.26) |                                                                                                                                  |
|       |                            |           |            |                   |          |     |                 | beta-Cryptoxanthin<br>(Q5 vs. Q1) |          | 0.86<br>(0.63 to 1.19) |                                                                                                                                  |
|       |                            |           |            |                   |          |     |                 | Caffeine<br>(Q5 vs. Q1)           |          | 0.77<br>(0.55 to 1.07) |                                                                                                                                  |
|       |                            |           |            |                   |          |     |                 | Carotenes<br>(Q5 vs. Q1)          |          | 0.96<br>(0.70 to 1.31) |                                                                                                                                  |

|       |                            |           |            |                   |          |     |                 | Folate supplements<br>(Q5 vs. Q1)     |          | 0.88<br>(0.64 to 1.23) |            |
|-------|----------------------------|-----------|------------|-------------------|----------|-----|-----------------|---------------------------------------|----------|------------------------|------------|
|       |                            |           |            |                   |          |     |                 | Iodine<br>(Q5 vs. Q1)                 |          | 0.90<br>(0.67 to 1.21) |            |
|       |                            |           |            |                   |          |     |                 | Iron supplements<br>(Q5 vs. Q1)       |          | 0.86<br>(0.63 to 1.18) |            |
|       |                            |           |            |                   |          |     |                 | Lycopene<br>(Q5 vs. Q1)               |          | 0.79<br>(0.58 to 1.08) |            |
|       |                            |           |            |                   |          |     |                 | Magnesium<br>(Q5 vs. Q1)              |          | 0.74<br>(0.53 to 1.02) |            |
| Study | Project (follow-up period) | Countries | Diagnostic | Menopausal status | BC stage | Age | Sample size (n) | Exposures                             | Outcomes | HR/RR<br>(95% CIs)     | Covariates |
|       |                            |           |            |                   |          |     |                 | Methionine<br>(Q5 vs. Q1)             |          | 0.69<br>(0.50 to 0.94) |            |
|       |                            |           |            |                   |          |     |                 | Niacin<br>(Q5 vs. Q1)                 |          | 0.80<br>(0.59 to 1.09) |            |
|       |                            |           |            |                   |          |     |                 | Pantothenic acid<br>(Q5 vs. Q1)       |          | 0.92<br>(0.67 to 1.29) |            |
|       |                            |           |            |                   |          |     |                 | Potassium<br>(Q5 vs. Q1)              |          | 0.98<br>(0.69 to 1.38) |            |
|       |                            |           |            |                   |          |     |                 | Retinol supplements<br>(Q5 vs. Q1)    |          | 0.82<br>(0.59 to 1.13) |            |
|       |                            |           |            |                   |          |     |                 | Selenium<br>(Q5 vs. Q1)               |          | 0.86<br>(0.63 to 1.19) |            |
|       |                            |           |            |                   |          |     |                 | Sodium<br>(Q5 vs. Q1)                 |          | 0.79<br>(0.57 to 1.09) |            |
|       |                            |           |            |                   |          |     |                 | Tryptophan<br>(Q5 vs. Q1)             |          | 0.63<br>(0.46 to 0.87) |            |
|       |                            |           |            |                   |          |     |                 | Vitamin B1 supplements<br>(Q5 vs. Q1) |          | 0.82<br>(0.59 to 1.13) |            |



|       |                            |           |               |                   |          |     |                  | Vitamin B2 supplements (Q5 vs. Q1) |          | 0.81<br>(0.58 to 1.13) |                                                 |
|-------|----------------------------|-----------|---------------|-------------------|----------|-----|------------------|------------------------------------|----------|------------------------|-------------------------------------------------|
|       |                            |           |               |                   |          |     |                  | Vitamin B6 supplements (Q5 vs. Q1) |          | 0.78<br>(0.56 to 1.09) |                                                 |
|       |                            |           |               |                   |          |     |                  | Vitamin C supplements (Q5 vs. Q1)  |          | 1.18<br>(0.85 to 1.63) |                                                 |
|       |                            |           |               |                   |          |     |                  | Vitamin D supplements (Q5 vs. Q1)  |          | 0.86<br>(0.62 to 1.17) |                                                 |
|       |                            |           |               |                   |          |     |                  | Vitamin E supplements (Q5 vs. Q1)  |          | 0.77<br>(0.56 to 1.05) |                                                 |
|       |                            |           |               |                   |          |     |                  | Zinc supplements (Q5 vs. Q1)       |          | 0.83<br>(0.61 to 1.14) |                                                 |
|       |                            |           | Prediagnostic |                   |          |     | 1,504<br>(Total) | Fat (Q5 vs. Q1)                    |          | 1.21<br>(0.78 to 1.90) | Quantiles of nutrient                           |
| Study | Project (follow-up period) | Countries | Diagnostic    | Menopausal status | BC stage | Age | Sample size (n)  | Exposures                          | Outcomes | HR/RR (95% CIs)        | Covariates                                      |
|       |                            |           |               |                   |          |     |                  | Fiber (Q5 vs. Q1)                  |          | 0.77<br>(0.45 to 1.25) | or food intake prior to diagnosis,              |
|       |                            |           |               |                   |          |     |                  | Lutein/zeaxanthin (Q5 vs. Q1)      |          | 0.85<br>(0.53 to 1.38) | previous diet interval, age, diet               |
|       |                            |           |               |                   |          |     |                  | Calcium (Q5 vs. Q1)                |          | 0.64<br>(0.41 to 0.99) | interval, calendar year of diagnosis,           |
|       |                            |           |               |                   |          |     | death =238)      | Protein (Q5 vs. Q1)                |          | 0.70<br>(0.46 to 1.08) | BMI, oral contraceptive use, menopausal status, |
|       |                            |           |               |                   |          |     |                  | Omega-3 fatty acids (Q5 vs. Q1)    |          | 1.00<br>(0.62 to 1.60) | postmenopausal hormone use,                     |
|       |                            |           |               |                   |          |     |                  | 18:2 trans fatty acid              |          | 1.58<br>(1.03 to 2.43) |                                                 |

|                     |                                                         |               |               |                                |          |                 |                                               |                                                              |                                  |                        |                                                                                                |
|---------------------|---------------------------------------------------------|---------------|---------------|--------------------------------|----------|-----------------|-----------------------------------------------|--------------------------------------------------------------|----------------------------------|------------------------|------------------------------------------------------------------------------------------------|
|                     |                                                         |               |               |                                |          |                 |                                               | (Q5 vs. Q1)                                                  |                                  |                        | smoking, age at first birth and parity, number of metastatic lymph nodes, tumor size, calories |
|                     |                                                         |               |               |                                |          |                 | Poultry                                       |                                                              | 0.60                             |                        |                                                                                                |
|                     |                                                         |               |               |                                |          |                 | (Q4 vs. Q1)                                   |                                                              | (0.39 to 0.92)                   |                        |                                                                                                |
|                     |                                                         |               |               |                                |          |                 | Dairy (Q4 vs. Q1)                             |                                                              | 0.71                             |                        |                                                                                                |
|                     |                                                         |               |               |                                |          |                 |                                               |                                                              | (0.44 to 1.14)                   |                        |                                                                                                |
|                     |                                                         |               |               |                                |          |                 | Fish (Q4 vs. Q1)                              |                                                              | 0.94                             |                        |                                                                                                |
|                     |                                                         |               |               |                                |          |                 |                                               |                                                              | (0.62 to 1.43)                   |                        |                                                                                                |
|                     |                                                         |               |               |                                |          |                 | Vegetables (Q4 vs. Q1)                        |                                                              | 0.98                             |                        |                                                                                                |
|                     |                                                         |               |               |                                |          |                 |                                               |                                                              | (0.62 to 1.53)                   |                        |                                                                                                |
|                     |                                                         |               |               |                                |          |                 | Antioxidants supplements (Ever vs. Nonusers)  | Breast cancer recurrence or breast cancer-specific mortality | 0.54<br>(0.27 to 1.04)           |                        | Age at diagnosis, age at menopause, tumor stage, tamoxifen,                                    |
| 2003 Fleischauer AT | Fatty acid stores tumor characteristics and breast      | United States | Prediagnostic | Postmenopausal                 | I-III    | Mean 62.1 years | 220 (BC-specific death =23; BC recurrence=41) | Vitamin E supplements (Ever vs. Nonusers)                    |                                  | 0.55<br>(0.28 to 1.08) |                                                                                                |
| Study               | Project (follow-up period)                              | Countries     | Diagnostic    | Menopausal status              | BC stage | Age             | Sample size (n)                               | Exposures                                                    | Outcomes                         | HR/RR (95% CIs)        | Covariates                                                                                     |
|                     | cancer (FASTCAB; 12-14 years)                           |               |               |                                |          |                 |                                               | Vitamin C supplements (Ever vs. Nonusers)                    |                                  | 0.64<br>(0.32 to 1.27) | radiotherapy, HRT, smoking, exercise, dietary intake of vitamin C or E                         |
|                     |                                                         |               |               |                                |          |                 |                                               | Total fat (Q4 vs. Q1)                                        |                                  | 1.8<br>(0.9 to 4.8)    |                                                                                                |
|                     |                                                         |               |               |                                |          |                 |                                               | Saturated fat (Q4 vs. Q1)                                    |                                  | 2.5<br>(1.2 to 5.3)    |                                                                                                |
| 2004 Borugian MJ    | British Columbia Cancer Agency (BCCA; median 8.1 years) | Canada        | Prediagnostic | Premenopausal + Postmenopausal | I-III    | Mean 54.5 years | 603 (BC-specific mortality =91)               | Protein (Q4 vs. Q1)                                          | Breast cancer-specific mortality | 0.4<br>(0.2 to 0.8)    | Age, total caloric intake, stage at diagnosis                                                  |
|                     |                                                         |               |               |                                |          |                 |                                               | Total carbohydrates (Q4 vs. Q1)                              |                                  | 1.5<br>(0.7 to 3.4)    |                                                                                                |
|                     |                                                         |               |               |                                |          |                 |                                               | Fiber (Q4 vs. Q1)                                            |                                  | 0.7<br>(0.4 to 1.3)    |                                                                                                |

|                     |                                                             |           |               |                      |          |                       |                                       | E-Carb<br>(Q4 vs. Q1)                 |                       | 1.7<br>(0.7 to 3.8)    |                                                         |
|---------------------|-------------------------------------------------------------|-----------|---------------|----------------------|----------|-----------------------|---------------------------------------|---------------------------------------|-----------------------|------------------------|---------------------------------------------------------|
|                     |                                                             |           |               |                      |          |                       |                                       | Total fat<br>(Q4 vs. Q1)              |                       | 4.8<br>(1.3 to 18.1)   |                                                         |
|                     |                                                             |           |               |                      |          |                       |                                       | Saturated fat<br>(Q4 vs. Q1)          |                       | 4.9<br>(1.4 to 17.0)   |                                                         |
|                     |                                                             |           |               | Premenopausal        |          | Mean<br>43.1<br>years | 235 (BC-<br>specific<br>death<br>=42) | Protein<br>(Q4 vs. Q1)                |                       | 0.2<br>(0.1 to 0.9)    |                                                         |
|                     |                                                             |           |               |                      |          |                       |                                       | Total<br>carbohydrates<br>(Q4 vs. Q1) |                       | 1.3<br>(0.3 to 5.1)    |                                                         |
|                     |                                                             |           |               |                      |          |                       |                                       | Fiber (Q4 vs.<br>Q1)                  |                       | 0.7<br>(0.2 to 1.6)    |                                                         |
| Study               | Project (follow-up period)                                  | Countries | Diagnostic    | Menopausal<br>status | BC stage | Age                   | Sample<br>size (n)                    | Exposures                             | Outcomes              | HR/RR<br>(95% CIs)     | Covariates                                              |
|                     |                                                             |           |               |                      |          |                       |                                       | E-Carb<br>(Q4 vs. Q1)                 |                       | 2.1<br>(0.5 to 8.6)    |                                                         |
|                     |                                                             |           |               |                      |          |                       |                                       | Total fat<br>(Q4 vs. Q1)              |                       | 0.7<br>(0.2 to 2.2)    |                                                         |
|                     |                                                             |           |               |                      |          |                       |                                       | Saturated fat<br>(Q4 vs. Q1)          |                       | 1.5<br>(0.5 to 4.0)    |                                                         |
|                     |                                                             |           |               | postmenopausal       |          |                       |                                       | Protein<br>(Q4 vs. Q1)                |                       | 0.6<br>(0.2 to 1.6)    |                                                         |
|                     |                                                             |           |               |                      |          |                       |                                       | Total<br>carbohydrates<br>(Q4 vs. Q1) |                       | 2.0<br>(0.7 to 5.7)    |                                                         |
|                     |                                                             |           |               |                      |          |                       |                                       | Fiber (Q4 vs.<br>Q1)                  |                       | 0.8<br>(0.3 to 1.8)    |                                                         |
|                     |                                                             |           |               |                      |          |                       |                                       | E-Carb<br>(Q4 vs. Q1)                 |                       | 1.7<br>(0.6 to 4.9)    |                                                         |
| 2005 Boyapati<br>SM | Shanghai breast cancer<br>study (SBCS; median 5.2<br>years) | China     | Prediagnostic | Premenopausal<br>1+  | I-IV     | 25 to 64<br>years     | 1,459<br>(Total                       | Total soy<br>protein (T3 vs.<br>T1)   | Disease-free survival | 0.99<br>(0.73 to 1.33) | Age at diagnosis,<br>stage of disease,<br>radiotherapy, |

|                 |                                            |               |                |                                |             |                       |                                                  |                                  |                                  |                                   |                                                                                                                                                                                               |
|-----------------|--------------------------------------------|---------------|----------------|--------------------------------|-------------|-----------------------|--------------------------------------------------|----------------------------------|----------------------------------|-----------------------------------|-----------------------------------------------------------------------------------------------------------------------------------------------------------------------------------------------|
|                 |                                            |               | Postmenopausal |                                |             | death =297)           | Total isoflavones (T3 vs. T1)                    |                                  | 1.06 (0.79 to 1.42)              | ER/PR status, total energy intake |                                                                                                                                                                                               |
|                 |                                            |               | Premenopausal  |                                |             | 339 (Total death =58) | Total soy protein (T3 vs. T1)                    |                                  | 1.09 (0.74 to 1.60)              |                                   |                                                                                                                                                                                               |
|                 |                                            |               | Postmenopausal |                                |             | 143 (Total death =39) | Total soy protein (T3 vs. T1)                    |                                  | 0.79 (0.49 to 1.28)              |                                   |                                                                                                                                                                                               |
| 2005 Kroenke CH | Nurses' Health Study (NHS; median 9 years) | United States | Prediagnostic  | Premenopausal + Postmenopausal | Invasive BC | Mean 57.8 years       | 2,619 (Total death =414; BC-specific death =242) | Western diet pattern (Q5 vs. Q1) | All-cause mortality              | 1.40 (0.93 to 2.09)               | Age, BMI, energy intake, smoking, physical activity, diet missing in 1986,                                                                                                                    |
| Study           | Project (follow-up period)                 | Countries     | Diagnostic     | Menopausal status              | BC stage    | Age                   | Sample size (n)                                  | Exposures                        | Outcomes                         | HR/RR (95% CIs)                   | Covariates                                                                                                                                                                                    |
|                 |                                            |               |                |                                |             |                       |                                                  | Western diet pattern (Q5 vs. Q1) | Breast cancer-specific mortality | 1.01 (0.59 to 1.72)               | 1990, 1994, age at menarche, oral contraceptive use, birth index, menopausal status, use of postmenopausal hormone therapy, age at menopause, tamoxifen use, chemotherapy, stage at diagnosis |
|                 |                                            |               | Postdiagnostic |                                |             |                       |                                                  | Western diet pattern             | All-cause mortality              | 1.53 (1.03 to 2.29)               | Age, time since diagnosis, BMI,                                                                                                                                                               |

|            |                                                           |           |               |                                       |          |                       |                                                         | (Q5 vs. Q1)<br>Prudent diet<br>pattern<br>(Q5 vs. Q1) |                                      | 0.78<br>(0.54 to 1.12) | energy intake,<br>smoking,<br>physical activity,<br>diet missing in<br>1986, 1990, 1994,<br>1998, age a,                                                                                                |
|------------|-----------------------------------------------------------|-----------|---------------|---------------------------------------|----------|-----------------------|---------------------------------------------------------|-------------------------------------------------------|--------------------------------------|------------------------|---------------------------------------------------------------------------------------------------------------------------------------------------------------------------------------------------------|
|            |                                                           |           |               |                                       |          |                       |                                                         | Western diet<br>pattern<br>(Q5 vs. Q1)                | Breast cancer-specific               | 1.01<br>(0.60 to 1.70) |                                                                                                                                                                                                         |
|            |                                                           |           |               |                                       |          |                       |                                                         | Prudent diet<br>pattern<br>(Q5 vs. Q1)                | mortality                            | 1.07<br>(0.66 to 1.73) |                                                                                                                                                                                                         |
| Study      | Project (follow-up period)                                | Countries | Diagnostic    | Menopausal<br>status                  | BC stage | Age                   | Sample<br>size (n)                                      | Exposures                                             | Outcomes                             | HR/RR<br>(95% CIs)     | Covariates                                                                                                                                                                                              |
|            |                                                           |           |               |                                       |          |                       |                                                         |                                                       |                                      |                        | menarche, oral<br>contraceptive<br>use, birth index,<br>menopausal<br>status, use of<br>postmenopausal<br>hormone therapy,<br>age at<br>menopause,<br>tamoxifen,<br>chemotherapy,<br>stage at diagnosis |
|            |                                                           |           |               |                                       |          |                       |                                                         | Ginseng<br>(Regular use vs.<br>Never use)             | All-cause mortality                  | 0.71<br>(0.52 to 0.98) | Age at diagnosis,<br>marital status,<br>education,<br>income, tumor-<br>node metastasis,<br>ER/PR status,<br>surgery,<br>chemotherapy,<br>radiotherapy,<br>tamoxifen use                                |
| 2006 Cui Y | Shanghai breast cancer<br>study (SBCS; mean 4.8<br>years) | China     | Prediagnostic | Premenopausal<br>1+<br>Postmenopausal | I-IV     | Mean<br>48.2<br>years | 1,455<br>(Total<br>death<br>=191; BC<br>recurrence=235) | Ginseng<br>(Regular use vs.<br>Never use)             | Disease-free survival,<br>recurrence | 0.70<br>(0.53 to 0.93) |                                                                                                                                                                                                         |

| Study               | Project (follow-up period)                                                 | Countries        | Diagnostic    | Menopausal status | BC stage                        | Age                    | Sample size (n)                                                 | Exposures                                  | Outcomes            | HR/RR (95% CIs)        | Covariates                                                                                                            |
|---------------------|----------------------------------------------------------------------------|------------------|---------------|-------------------|---------------------------------|------------------------|-----------------------------------------------------------------|--------------------------------------------|---------------------|------------------------|-----------------------------------------------------------------------------------------------------------------------|
| 2006 McEligot<br>AJ | Cancer surveillance<br>program of Orange County<br>(CSPOC; mean 6.7 years) | United<br>States | Prediagnostic | Postmenopausal    | In situ and<br>metastatic<br>BC | Mean<br>64.78<br>years | 516<br>(Total<br>death<br>=96; BC-<br>specific<br>death<br>=41) | Vegetables<br>(T3 vs. T1)                  | All-cause mortality | 0.57<br>(0.35 to 0.94) | Stage of disease,<br>age at diagnosis,<br>BMI, parity, HRT<br>use, alcohol use,<br>multivitamin use,<br>energy intake |
|                     |                                                                            |                  |               |                   |                                 |                        |                                                                 | Fruit (T3 vs. T1)                          |                     | 0.63<br>(0.38 to 1.05) |                                                                                                                       |
|                     |                                                                            |                  |               |                   |                                 |                        |                                                                 | Total fat<br>(T3 vs. T1)                   |                     | 3.12<br>(1.79 to 5.44) |                                                                                                                       |
|                     |                                                                            |                  |               |                   |                                 |                        |                                                                 | Saturated fat<br>(T3 vs. T1)               |                     | 4.45<br>(2.26 to 8.78) |                                                                                                                       |
|                     |                                                                            |                  |               |                   |                                 |                        |                                                                 | Oleic fatty acid<br>(T3 vs. T1)            |                     | 3.56<br>(1.67 to 7.59) |                                                                                                                       |
|                     |                                                                            |                  |               |                   |                                 |                        |                                                                 | Linoleic fatty<br>acid<br>(T3 vs. T1)      |                     | 2.39<br>(1.21 to 4.69) |                                                                                                                       |
|                     |                                                                            |                  |               |                   |                                 |                        |                                                                 | Fiber (T3 vs. T1)                          |                     | 0.48<br>(0.27 to 0.86) |                                                                                                                       |
|                     |                                                                            |                  |               |                   |                                 |                        |                                                                 | Folate<br>(T3 vs. T1)                      |                     | 0.34<br>(0.18 to 0.67) |                                                                                                                       |
|                     |                                                                            |                  |               |                   |                                 |                        |                                                                 | Vitamin C<br>(T3 vs. T1)                   |                     | 0.45<br>(0.25 to 0.78) |                                                                                                                       |
|                     |                                                                            |                  |               |                   |                                 |                        |                                                                 | alpha-Carotene<br>(T3 vs. T1)              |                     | 0.77<br>(0.45 to 1.30) |                                                                                                                       |
|                     |                                                                            |                  |               |                   |                                 |                        |                                                                 | beta-Carotene<br>(T3 vs. T1)               |                     | 0.50<br>(0.29 to 0.85) |                                                                                                                       |
|                     |                                                                            |                  |               |                   |                                 |                        |                                                                 | beta-<br>Cryptoxanthin<br>(T3 vs. T1)      |                     | 0.54<br>(0.30 to 0.96) |                                                                                                                       |
|                     |                                                                            |                  |               |                   |                                 |                        |                                                                 | Lutein<br>(T3 vs. T1)                      |                     | 0.50<br>(0.30 to 0.84) |                                                                                                                       |
|                     |                                                                            |                  |               |                   |                                 |                        |                                                                 | Lycopene<br>(T3 vs. T1)                    |                     | 0.76<br>(0.45 to 1.30) |                                                                                                                       |
|                     |                                                                            |                  |               |                   |                                 |                        |                                                                 | Provitamin A<br>supplements<br>(T3 vs. T1) |                     | 0.58<br>(0.34 to 0.99) |                                                                                                                       |

|              |                                                                                  |               |                |                   |                               |     |                       | Folate supplements (T3 vs. T1)                                              |                     | 1.05 (0.54 to 2.03) |                                                                                                                                 |
|--------------|----------------------------------------------------------------------------------|---------------|----------------|-------------------|-------------------------------|-----|-----------------------|-----------------------------------------------------------------------------|---------------------|---------------------|---------------------------------------------------------------------------------------------------------------------------------|
|              |                                                                                  |               |                |                   |                               |     |                       | Vitamin C supplements (T3 vs. T1)                                           |                     | 0.58 (0.31 to 1.09) |                                                                                                                                 |
| Study        | Project (follow-up period)                                                       | Countries     | Diagnostic     | Menopausal status | BC stage                      | Age | Sample size (n)       | Exposures                                                                   | Outcomes            | HR/RR (95% CIs)     | Covariates                                                                                                                      |
|              |                                                                                  |               |                |                   |                               |     |                       | beta-Carotene supplements (T3 vs. T1)                                       |                     | 0.69 (0.40 to 1.20) |                                                                                                                                 |
|              |                                                                                  |               |                |                   |                               |     |                       | Any fruits, fruit juices, and vegetables (>46 variables vs. 0-18 variables) |                     | 1.38 (0.65 to 2.91) |                                                                                                                                 |
|              |                                                                                  |               |                |                   |                               |     |                       | Any fruits and fruit juices (>24 variables vs. 0-6 variables)               |                     | 1.10 (0.48 to 2.52) | Reproductive and menstrual histories, active and passive smoking, alcohol intake, body size, physical activity, medical history |
| 2006 Fink BN | Long Island breast cancer study project (LIBCSP; 1996-1997 through 2002 to 2004) | United States | Postdiagnostic | Premenopausal     | <i>in situ</i> or Invasive BC | -   | 376 (Total death =43) | Citrus fruits (>12 variables vs. 0-1 variables)                             | All-cause mortality | 1.70 (0.75 to 3.89) |                                                                                                                                 |
|              |                                                                                  |               |                | 1                 |                               |     |                       | Any vegetables (>24 variables vs. 0-8 variables)                            |                     | 1.40 (0.71 to 2.76) |                                                                                                                                 |
|              |                                                                                  |               |                |                   |                               |     |                       | Leafy vegetables (>9 variables vs. 0-2 variables)                           |                     | 0.85 (0.39 to 1.85) |                                                                                                                                 |
|              |                                                                                  |               |                |                   |                               |     |                       | Yellow vegetables (>16 variables vs. 0-4 variables)                         |                     | 1.09 (0.52 to 2.28) |                                                                                                                                 |

|       |                            |           |            |                      |          |     |                    | Cruciferous<br>vegetables<br>(>6 variables vs.<br>0-1 variables)          |          | 0.72<br>(0.34 to 1.54) |            |
|-------|----------------------------|-----------|------------|----------------------|----------|-----|--------------------|---------------------------------------------------------------------------|----------|------------------------|------------|
|       |                            |           |            |                      |          |     |                    | Dietary alpha-<br>Carotene (>401.9<br>µg/day vs. 0-<br>74.5 µg/day)       |          | 0.76<br>(0.35 to 1.67) |            |
|       |                            |           |            |                      |          |     |                    | Dietary beta-<br>Carotene<br>(>3,753.8 µg/day<br>vs. 0-1,067.9<br>µg/day) |          | 0.82<br>(0.37 to 1.82) |            |
| Study | Project (follow-up period) | Countries | Diagnostic | Menopausal<br>status | BC stage | Age | Sample<br>size (n) | Exposures                                                                 | Outcomes | HR/RR<br>(95% CIs)     | Covariates |
|       |                            |           |            |                      |          |     |                    | Dietary<br>cryptoxanthin<br>(>133.6 µg/day<br>vs. 0-31.2<br>µg/day)       |          | 1.13<br>(0.53 to 2.41) |            |
|       |                            |           |            |                      |          |     |                    | Dietary lutein<br>(>3,073.5 µg/day<br>vs. 0-675.6<br>µg/day)              |          | 1.71<br>(0.89 to 3.29) |            |
|       |                            |           |            |                      |          |     |                    | Dietary<br>lycopene<br>(>2,263.9 µg/day<br>vs. 0-548.6<br>µg/day)         |          | 0.61<br>(0.29 to 1.29) |            |
|       |                            |           |            |                      |          |     |                    | Dietary vitamin<br>C (>173 mg/day<br>vs. 0-60.7<br>mg/day)                |          | 0.90<br>(0.42 to 1.94) |            |
|       |                            |           |            |                      |          |     |                    | Dietary vitamin<br>E (>10.4 a-te/day)                                     |          | 0.96<br>(0.44 to 2.09) |            |



|       |                            |           |            |                      |          |     |                                 | vs. 0-4.4 a-<br>te/day)                                                                    |          |                        |            |
|-------|----------------------------|-----------|------------|----------------------|----------|-----|---------------------------------|--------------------------------------------------------------------------------------------|----------|------------------------|------------|
|       |                            |           |            |                      |          |     |                                 | Any fruits, fruit<br>juices, and<br>vegetables<br>(>46 variables<br>vs. 0-18<br>variables) |          | 0.68<br>(0.42 to 1.09) |            |
|       |                            |           |            |                      |          |     |                                 | Any fruits and<br>fruit juices<br>(>24 variables<br>vs. 0-6 variables)                     |          | 0.87<br>(0.57 to 1.35) |            |
|       |                            |           |            | Postmenopaus<br>al   |          |     | 834<br>(Total<br>death<br>=132) | Citrus fruits<br>(>12 variables<br>vs. 0-1 variables)                                      |          | 0.90<br>(0.56 to 1.44) |            |
|       |                            |           |            |                      |          |     |                                 | Any vegetables<br>(>24 variables<br>vs. 0-8 variables)                                     |          | 0.92<br>(0.57 to 1.48) |            |
|       |                            |           |            |                      |          |     |                                 | Leafy vegetables<br>(>9 variables vs.<br>0-2 variables)                                    |          | 0.72<br>(0.41 to 1.24) |            |
| Study | Project (follow-up period) | Countries | Diagnostic | Menopausal<br>status | BC stage | Age | Sample<br>size (n)              | Exposures                                                                                  | Outcomes | HR/RR<br>(95% CIs)     | Covariates |
|       |                            |           |            |                      |          |     |                                 | Yellow<br>vegetables (>16<br>variables vs. 0-4<br>variables)                               |          | 0.90<br>(0.58 to 1.40) |            |
|       |                            |           |            |                      |          |     |                                 | Cruciferous<br>vegetables<br>(>6 variables vs.<br>0-1 variables)                           |          | 1.07<br>(0.67 to 1.72) |            |
|       |                            |           |            |                      |          |     |                                 | Dietary alpha-<br>Carotene (>401.9                                                         |          | 1.20<br>(0.79 to 1.81) |            |

|              |                                                  |               |               |                   |             |     |                 | µg/day vs. 0-74.5 µg/day)<br>Dietary beta-Carotene<br>(>3,753.8 µg/day vs. 0-1,067.9 µg/day)<br>Dietary cryptoxanthin<br>(>133.6 µg/day vs. 0-31.2 µg/day)<br>Dietary lutein<br>(>3,073.5 µg/day vs. 0-675.6 µg/day)<br>Dietary lycopene<br>(>2,263.9 µg/day vs. 0-548.6 µg/day)<br>Dietary vitamin C<br>(>173 mg/day vs. 0-60.7 mg/day)<br>Dietary vitamin E<br>(>10.4 a-te/day vs. 0-4.4 a-te/day) |                     | 1.07<br>(0.70 to 1.64)<br>0.82<br>(0.53 to 1.28)<br>0.68<br>(0.42 to 1.12)<br>0.79<br>(0.48 to 1.30)<br>1.08<br>(0.70 to 1.66)<br>0.77<br>(0.47 to 1.27) |                |
|--------------|--------------------------------------------------|---------------|---------------|-------------------|-------------|-----|-----------------|------------------------------------------------------------------------------------------------------------------------------------------------------------------------------------------------------------------------------------------------------------------------------------------------------------------------------------------------------------------------------------------------------|---------------------|----------------------------------------------------------------------------------------------------------------------------------------------------------|----------------|
| Study        | Project (follow-up period)                       | Countries     | Diagnostic    | Menopausal status | BC stage    | Age | Sample size (n) | Exposures                                                                                                                                                                                                                                                                                                                                                                                            | Outcomes            | HR/RR (95% CIs)                                                                                                                                          | Covariates     |
| 2007 Fink BN | Long Island breast cancer study project (LIBCSP; | United States | Prediagnostic |                   | Invasive BC | -   | 1,210 (Total    | Total flavonoids (>340.5 mg/day                                                                                                                                                                                                                                                                                                                                                                      | All-cause mortality | 0.96 (0.66 to 1.40)                                                                                                                                      | Age and energy |

|                                 |                          |                                                           |                        |
|---------------------------------|--------------------------|-----------------------------------------------------------|------------------------|
| 1996-1997 through 2002 to 2004) | death<br>=173)           | vs. 0-42.4<br>mg/day)                                     |                        |
|                                 |                          | Total flavonols<br>(>14.5 mg/day<br>vs. 0-3.4<br>mg/day)  | 1.12<br>(0.78 to 1.62) |
|                                 |                          | Total flavones<br>(>0.20 mg/day<br>vs. 0-0.03<br>mg/day)  | 0.63<br>(0.41 to 0.96) |
|                                 |                          | Total flavanones<br>(>48.6 mg/day<br>vs. 0-4.0<br>mg/day) | 1.03<br>(0.72 to 1.48) |
| Premenopausal+Postmenopausal    |                          | Total flavan-3-ols (>263.8 mg/day vs. 0-5.0 mg/day)       | 1.01<br>(0.70 to 1.46) |
|                                 |                          | Total anthocyanidins (>4.24 mg/day vs. 0-0.03 mg/day)     | 0.64<br>(0.42 to 0.98) |
|                                 |                          | Total isoflavones (>7.48 mg/day vs. 0-0.29 mg/day)        | 0.52<br>(0.33 to 0.82) |
|                                 |                          | Total lignans (>9.0 mg/day vs. 0-2.2 mg/day)              | 1.03<br>(0.71 to 1.49) |
| Premenopausal                   | 376 (Total death<br>=43) | Total flavonoids (>340.5 mg/day vs. 0-42.4 mg/day)        | 1.77<br>(0.91 to 3.46) |

|       |                            |           |            |                      |          |     |                                 | Total flavonols<br>(>14.5 mg/day<br>vs. 0-3.4<br>mg/day)          |          | 1.64<br>(0.84 to 3.17) |            |
|-------|----------------------------|-----------|------------|----------------------|----------|-----|---------------------------------|-------------------------------------------------------------------|----------|------------------------|------------|
|       |                            |           |            |                      |          |     |                                 | Total flavones<br>(>0.20 mg/day<br>vs. 0-0.03<br>mg/day)          |          | 0.69<br>(0.32 to 1.47) |            |
| Study | Project (follow-up period) | Countries | Diagnostic | Menopausal<br>status | BC stage | Age | Sample<br>size (n)              | Exposures                                                         | Outcomes | HR/RR<br>(95% CIs)     | Covariates |
|       |                            |           |            |                      |          |     |                                 | Total flavanones<br>(>48.6 mg/day<br>vs. 0-4.0<br>mg/day)         |          | 1.08<br>(0.48 to 2.43) |            |
|       |                            |           |            |                      |          |     |                                 | Total flavan-3-<br>ols (>263.8<br>mg/day vs. 0-5.0<br>mg/day)     |          | 1.76<br>(0.91 to 3.42) |            |
|       |                            |           |            |                      |          |     |                                 | Total<br>anthocyanidins<br>(>4.24 mg/day<br>vs. 0-0.03<br>mg/day) |          | 0.62<br>(0.27 to 1.40) |            |
|       |                            |           |            |                      |          |     |                                 | Total<br>isoflavones<br>(>7.48 mg/day<br>vs. 0-0.29<br>mg/day)    |          | 0.71<br>(0.34 to 1.48) |            |
|       |                            |           |            |                      |          |     |                                 | Total lignans<br>(>9.0 mg/day vs.<br>0-2.2 mg/day)                |          | 1.27<br>(0.63 to 2.54) |            |
|       |                            |           |            | Postmenopausal       |          |     | 834<br>(Total<br>death<br>=130) | Total flavonoids<br>(>340.5 mg/day<br>vs. 0-42.4<br>mg/day)       |          | 0.78<br>(0.49 to 1.25) |            |

|       |                            |           |            |                                   |          |     |                            | Total flavonols<br>(>14.5 mg/day<br>vs. 0-3.4<br>mg/day)          |                                     | 0.98<br>(0.62 to 1.53) |            |
|-------|----------------------------|-----------|------------|-----------------------------------|----------|-----|----------------------------|-------------------------------------------------------------------|-------------------------------------|------------------------|------------|
|       |                            |           |            |                                   |          |     |                            | Total flavones<br>(>0.20 mg/day<br>vs. 0-0.03<br>mg/day)          |                                     | 0.59<br>(0.35 to 0.99) |            |
|       |                            |           |            |                                   |          |     |                            | Total flavanones<br>(>48.6 mg/day<br>vs. 0-4.0<br>mg/day)         |                                     | 0.99<br>(0.66 to 1.49) |            |
|       |                            |           |            |                                   |          |     |                            | Total flavan-3-<br>ols (>263.8<br>mg/day vs. 0-5.0<br>mg/day)     |                                     | 0.84<br>(0.53 to 1.32) |            |
|       |                            |           |            |                                   |          |     |                            | Total<br>anthocyanidins<br>(>4.24 mg/day<br>vs. 0-0.03<br>mg/day) |                                     | 0.66<br>(0.40 to 1.08) |            |
| Study | Project (follow-up period) | Countries | Diagnostic | Menopausal<br>status              | BC stage | Age | Sample<br>size (n)         | Exposures                                                         | Outcomes                            | HR/RR<br>(95% CIs)     | Covariates |
|       |                            |           |            |                                   |          |     |                            | Total<br>isoflavones<br>(>7.48 mg/day<br>vs. 0-0.29<br>mg/day)    |                                     | 0.44<br>(0.24 to 0.81) |            |
|       |                            |           |            |                                   |          |     |                            | Total lignans<br>(>9.0 mg/day vs.<br>0-2.2 mg/day)                |                                     | 0.98<br>(0.63 to 1.54) |            |
|       |                            |           |            | Premenopausal +<br>Postmenopausal |          |     | 1,148<br>(BC-<br>specific) | Total flavonoids<br>(>340.5 mg/day vs. 0-42.4<br>mg/day)          | Breast cancer-specific<br>mortality | 0.88<br>(0.55 to 1.42) |            |

|       |                            |           |            |                      |          |     | death<br>=113)     | Total flavonols<br>(>14.5 mg/day<br>vs. 0-3.4<br>mg/day)          |          | 1.20<br>(0.77 to 1.87) |            |
|-------|----------------------------|-----------|------------|----------------------|----------|-----|--------------------|-------------------------------------------------------------------|----------|------------------------|------------|
|       |                            |           |            |                      |          |     |                    | Total flavones<br>(>0.20 mg/day<br>vs. 0-0.03<br>mg/day)          |          | 0.48<br>(0.27 to 0.84) |            |
|       |                            |           |            |                      |          |     |                    | Total flavanones<br>(>48.6 mg/day<br>vs. 0-4.0<br>mg/day)         |          | 0.98<br>(0.62 to 1.56) |            |
|       |                            |           |            |                      |          |     |                    | Total flavan-3-<br>ols (>263.8<br>mg/day vs. 0-5.0<br>mg/day)     |          | 0.89<br>(0.55 to 1.43) |            |
|       |                            |           |            |                      |          |     |                    | Total<br>anthocyanidins<br>(>4.24 mg/day<br>vs. 0-0.03<br>mg/day) |          | 0.68<br>(0.41 to 1.13) |            |
|       |                            |           |            |                      |          |     |                    | Total<br>isoflavones<br>(>7.48 mg/day<br>vs. 0-0.29<br>mg/day)    |          | 0.87<br>(0.54 to 1.41) |            |
|       |                            |           |            |                      |          |     |                    | Total lignans<br>(>9.0 mg/day vs.<br>0-2.2 mg/day)                |          | 0.95<br>(0.60 to 1.51) |            |
| Study | Project (follow-up period) | Countries | Diagnostic | Menopausal<br>status | BC stage | Age | Sample<br>size (n) | Exposures                                                         | Outcomes | HR/RR<br>(95% CIs)     | Covariates |

|                    |                                   |                                                                |                        |
|--------------------|-----------------------------------|----------------------------------------------------------------|------------------------|
| Premenopausal<br>1 | 367 (BC-specific<br>death<br>=34) | Total flavonoids<br>(>340.5 mg/day<br>vs. 0-42.4<br>mg/day)    | 1.75<br>(0.82 to 3.72) |
|                    |                                   | Total flavonols<br>(>14.5 mg/day<br>vs. 0-3.4<br>mg/day)       | 1.64<br>(0.78 to 3.46) |
|                    |                                   | Total flavones<br>(>0.20 mg/day<br>vs. 0-0.03<br>mg/day)       | 0.45<br>(0.17 to 1.19) |
|                    |                                   | Total flavanones<br>(>48.6 mg/day<br>vs. 0-4.0<br>mg/day)      | 0.61<br>(0.21 to 1.81) |
|                    |                                   | Total flavan-3-ols<br>(>263.8 mg/day vs. 0-5.0<br>mg/day)      | 1.75<br>(0.83 to 3.69) |
|                    |                                   | Total anthocyanidins<br>(>4.24 mg/day<br>vs. 0-0.03<br>mg/day) | 0.81<br>(0.35 to 1.89) |
|                    |                                   | Total isoflavones<br>(>7.48 mg/day<br>vs. 0-0.29<br>mg/day)    | 1.03<br>(0.46 to 2.28) |
|                    |                                   |                                                                |                        |
|                    |                                   |                                                                |                        |
|                    |                                   |                                                                |                        |

|  |  |  |  |  |  |  |  |  |  |  |
|--|--|--|--|--|--|--|--|--|--|--|
|  |  |  |  |  |  |  |  |  |  |  |
|  |  |  |  |  |  |  |  |  |  |  |
|  |  |  |  |  |  |  |  |  |  |  |
|  |  |  |  |  |  |  |  |  |  |  |
|  |  |  |  |  |  |  |  |  |  |  |
|  |  |  |  |  |  |  |  |  |  |  |
|  |  |  |  |  |  |  |  |  |  |  |
|  |  |  |  |  |  |  |  |  |  |  |
|  |  |  |  |  |  |  |  |  |  |  |
|  |  |  |  |  |  |  |  |  |  |  |
|  |  |  |  |  |  |  |  |  |  |  |
|  |  |  |  |  |  |  |  |  |  |  |
|  |  |  |  |  |  |  |  |  |  |  |
|  |  |  |  |  |  |  |  |  |  |  |
|  |  |  |  |  |  |  |  |  |  |  |
|  |  |  |  |  |  |  |  |  |  |  |
|  |  |  |  |  |  |  |  |  |  |  |
|  |  |  |  |  |  |  |  |  |  |  |
|  |  |  |  |  |  |  |  |  |  |  |
|  |  |  |  |  |  |  |  |  |  |  |
|  |  |  |  |  |  |  |  |  |  |  |
|  |  |  |  |  |  |  |  |  |  |  |
|  |  |  |  |  |  |  |  |  |  |  |
|  |  |  |  |  |  |  |  |  |  |  |
|  |  |  |  |  |  |  |  |  |  |  |
|  |  |  |  |  |  |  |  |  |  |  |
|  |  |  |  |  |  |  |  |  |  |  |
|  |  |  |  |  |  |  |  |  |  |  |
|  |  |  |  |  |  |  |  |  |  |  |
|  |  |  |  |  |  |  |  |  |  |  |
|  |  |  |  |  |  |  |  |  |  |  |
|  |  |  |  |  |  |  |  |  |  |  |
|  |  |  |  |  |  |  |  |  |  |  |
|  |  |  |  |  |  |  |  |  |  |  |
|  |  |  |  |  |  |  |  |  |  |  |
|  |  |  |  |  |  |  |  |  |  |  |
|  |  |  |  |  |  |  |  |  |  |  |
|  |  |  |  |  |  |  |  |  |  |  |
|  |  |  |  |  |  |  |  |  |  |  |
|  |  |  |  |  |  |  |  |  |  |  |
|  |  |  |  |  |  |  |  |  |  |  |
|  |  |  |  |  |  |  |  |  |  |  |
|  |  |  |  |  |  |  |  |  |  |  |
|  |  |  |  |  |  |  |  |  |  |  |
|  |  |  |  |  |  |  |  |  |  |  |
|  |  |  |  |  |  |  |  |  |  |  |
|  |  |  |  |  |  |  |  |  |  |  |
|  |  |  |  |  |  |  |  |  |  |  |
|  |  |  |  |  |  |  |  |  |  |  |
|  |  |  |  |  |  |  |  |  |  |  |
|  |  |  |  |  |  |  |  |  |  |  |
|  |  |  |  |  |  |  |  |  |  |  |
|  |  |  |  |  |  |  |  |  |  |  |
|  |  |  |  |  |  |  |  |  |  |  |
|  |  |  |  |  |  |  |  |  |  |  |
|  |  |  |  |  |  |  |  |  |  |  |
|  |  |  |  |  |  |  |  |  |  |  |
|  |  |  |  |  |  |  |  |  |  |  |
|  |  |  |  |  |  |  |  |  |  |  |
|  |  |  |  |  |  |  |  |  |  |  |
|  |  |  |  |  |  |  |  |  |  |  |
|  |  |  |  |  |  |  |  |  |  |  |
|  |  |  |  |  |  |  |  |  |  |  |
|  |  |  |  |  |  |  |  |  |  |  |
|  |  |  |  |  |  |  |  |  |  |  |
|  |  |  |  |  |  |  |  |  |  |  |
|  |  |  |  |  |  |  |  |  |  |  |
|  |  |  |  |  |  |  |  |  |  |  |
|  |  |  |  |  |  |  |  |  |  |  |
|  |  |  |  |  |  |  |  |  |  |  |
|  |  |  |  |  |  |  |  |  |  |  |
|  |  |  |  |  |  |  |  |  |  |  |
|  |  |  |  |  |  |  |  |  |  |  |
|  |  |  |  |  |  |  |  |  |  |  |
|  |  |  |  |  |  |  |  |  |  |  |
|  |  |  |  |  |  |  |  |  |  |  |
|  |  |  |  |  |  |  |  |  |  |  |
|  |  |  |  |  |  |  |  |  |  |  |
|  |  |  |  |  |  |  |  |  |  |  |
|  |  |  |  |  |  |  |  |  |  |  |
|  |  |  |  |  |  |  |  |  |  |  |
|  |  |  |  |  |  |  |  |  |  |  |
|  |  |  |  |  |  |  |  |  |  |  |
|  |  |  |  |  |  |  |  |  |  |  |
|  |  |  |  |  |  |  |  |  |  |  |
|  |  |  |  |  |  |  |  |  |  |  |
|  |  |  |  |  |  |  |  |  |  |  |
|  |  |  |  |  |  |  |  |  |  |  |
|  |  |  |  |  |  |  |  |  |  |  |
|  |  |  |  |  |  |  |  |  |  |  |
|  |  |  |  |  |  |  |  |  |  |  |
|  |  |  |  |  |  |  |  |  |  |  |
|  |  |  |  |  |  |  |  |  |  |  |
|  |  |  |  |  |  |  |  |  |  |  |
|  |  |  |  |  |  |  |  |  |  |  |
|  |  |  |  |  |  |  |  |  |  |  |
|  |  |  |  |  |  |  |  |  |  |  |
|  |  |  |  |  |  |  |  |  |  |  |
|  |  |  |  |  |  |  |  |  |  |  |
|  |  |  |  |  |  |  |  |  |  |  |
|  |  |  |  |  |  |  |  |  |  |  |
|  |  |  |  |  |  |  |  |  |  |  |
|  |  |  |  |  |  |  |  |  |  |  |
|  |  |  |  |  |  |  |  |  |  |  |
|  |  |  |  |  |  |  |  |  |  |  |
|  |  |  |  |  |  |  |  |  |  |  |
|  |  |  |  |  |  |  |  |  |  |  |
|  |  |  |  |  |  |  |  |  |  |  |
|  |  |  |  |  |  |  |  |  |  |  |
|  |  |  |  |  |  |  |  |  |  |  |
|  |  |  |  |  |  |  |  |  |  |  |
|  |  |  |  |  |  |  |  |  |  |  |
|  |  |  |  |  |  |  |  |  |  |  |
|  |  |  |  |  |  |  |  |  |  |  |
|  |  |  |  |  |  |  |  |  |  |  |
|  |  |  |  |  |  |  |  |  |  |  |
|  |  |  |  |  |  |  |  |  |  |  |
|  |  |  |  |  |  |  |  |  |  |  |
|  |  |  |  |  |  |  |  |  |  |  |
|  |  |  |  |  |  |  |  |  |  |  |
|  |  |  |  |  |  |  |  |  |  |  |
|  |  |  |  |  |  |  |  |  |  |  |
|  |  |  |  |  |  |  |  |  |  |  |
|  |  |  |  |  |  |  |  |  |  |  |
|  |  |  |  |  |  |  |  |  |  |  |
|  |  |  |  |  |  |  |  |  |  |  |
|  |  |  |  |  |  |  |  |  |  |  |
|  |  |  |  |  |  |  |  |  |  |  |
|  |  |  |  |  |  |  |  |  |  |  |
|  |  |  |  |  |  |  |  |  |  |  |
|  |  |  |  |  |  |  |  |  |  |  |
|  |  |  |  |  |  |  |  |  |  |  |
|  |  |  |  |  |  |  |  |  |  |  |
|  |  |  |  |  |  |  |  |  |  |  |
|  |  |  |  |  |  |  |  |  |  |  |
|  |  |  |  |  |  |  |  |  |  |  |
|  |  |  |  |  |  |  |  |  |  |  |
|  |  |  |  |  |  |  |  |  |  |  |
|  |  |  |  |  |  |  |  |  |  |  |
|  |  |  |  |  |  |  |  |  |  |  |
|  |  |  |  |  |  |  |  |  |  |  |
|  |  |  |  |  |  |  |  |  |  |  |
|  |  |  |  |  |  |  |  |  |  |  |
|  |  |  |  |  |  |  |  |  |  |  |
|  |  |  |  |  |  |  |  |  |  |  |
|  |  |  |  |  |  |  |  |  |  |  |
|  |  |  |  |  |  |  |  |  |  |  |
|  |  |  |  |  |  |  |  |  |  |  |
|  |  |  |  |  |  |  |  |  |  |  |
|  |  |  |  |  |  |  |  |  |  |  |
|  |  |  |  |  |  |  |  |  |  |  |
|  |  |  |  |  |  |  |  |  |  |  |
|  |  |  |  |  |  |  |  |  |  |  |
|  |  |  |  |  |  |  |  |  |  |  |
|  |  |  |  |  |  |  |  |  |  |  |
|  |  |  |  |  |  |  |  |  |  |  |
|  |  |  |  |  |  |  |  |  |  |  |
|  |  |  |  |  |  |  |  |  |  |  |
|  |  |  |  |  |  |  |  |  |  |  |
|  |  |  |  |  |  |  |  |  |  |  |
|  |  |  |  |  |  |  |  |  |  |  |
|  |  |  |  |  |  |  |  |  |  |  |
|  |  |  |  |  |  |  |  |  |  |  |
|  |  |  |  |  |  |  |  |  |  |  |
|  |  |  |  |  |  |  |  |  |  |  |
|  |  |  |  |  |  |  |  |  |  |  |
|  |  |  |  |  |  |  |  |  |  |  |
|  |  |  |  |  |  |  |  |  |  |  |
|  |  |  |  |  |  |  |  |  |  |  |
|  |  |  |  |  |  |  |  |  |  |  |
|  |  |  |  |  |  |  |  |  |  |  |
|  |  |  |  |  |  |  |  |  |  |  |
|  |  |  |  |  |  |  |  |  |  |  |
|  |  |  |  |  |  |  |  |  |  |  |
|  |  |  |  |  |  |  |  |  |  |  |
|  |  |  |  |  |  |  |  |  |  |  |
|  |  |  |  |  |  |  |  |  |  |  |
|  |  |  |  |  |  |  |  |  |  |  |
|  |  |  |  |  |  |  |  |  |  |  |
|  |  |  |  |  |  |  |  |  |  |  |
|  |  |  |  |  |  |  |  |  |  |  |
|  |  |  |  |  |  |  |  |  |  |  |
|  |  |  |  |  |  |  |  |  |  |  |
|  |  |  |  |  |  |  |  |  |  |  |
|  |  |  |  |  |  |  |  |  |  |  |
|  |  |  |  |  |  |  |  |  |  |  |
|  |  |  |  |  |  |  |  |  |  |  |
|  |  |  |  |  |  |  |  |  |  |  |
|  |  |  |  |  |  |  |  |  |  |  |
|  |  |  |  |  |  |  |  |  |  |  |
|  |  |  |  |  |  |  |  |  |  |  |
|  |  |  |  |  |  |  |  |  |  |  |
|  |  |  |  |  |  |  |  |  |  |  |
|  |  |  |  |  |  |  |  |  |  |  |
|  |  |  |  |  |  |  |  |  |  |  |
|  |  |  |  |  |  |  |  |  |  |  |
|  |  |  |  |  |  |  |  |  |  |  |
|  |  |  |  |  |  |  |  |  |  |  |
|  |  |  |  |  |  |  |  |  |  |  |
|  |  |  |  |  |  |  |  |  |  |  |
|  |  |  |  |  |  |  |  |  |  |  |
|  |  |  |  |  |  |  |  |  |  |  |
|  |  |  |  |  |  |  |  |  |  |  |
|  |  |  |  |  |  |  |  |  |  |  |
|  |  |  |  |  |  |  |  |  |  |  |
|  |  |  |  |  |  |  |  |  |  |  |
|  |  |  |  |  |  |  |  |  |  |  |
|  |  |  |  |  |  |  |  |  |  |  |
|  |  |  |  |  |  |  |  |  |  |  |
|  |  |  |  |  |  |  |  |  |  |  |
|  |  |  |  |  |  |  |  |  |  |  |
|  |  |  |  |  |  |  |  |  |  |  |
|  |  |  |  |  |  |  |  |  |  |  |
|  |  |  |  |  |  |  |  |  |  |  |
|  |  |  |  |  |  |  |  |  |  |  |
|  |  |  |  |  |  |  |  |  |  |  |
|  |  |  |  |  |  |  |  |  |  |  |
|  |  |  |  |  |  |  |  |  |  |  |
|  |  |  |  |  |  |  |  |  |  |  |
|  |  |  |  |  |  |  |  |  |  |  |
|  |  |  |  |  |  |  |  |  |  |  |
|  |  |  |  |  |  |  |  |  |  |  |
|  |  |  |  |  |  |  |  |  |  |  |
|  |  |  |  |  |  |  |  |  |  |  |
|  |  |  |  |  |  |  |  |  |  |  |
|  |  |  |  |  |  |  |  |  |  |  |
|  |  |  |  |  |  |  |  |  |  |  |
|  |  |  |  |  |  |  |  |  |  |  |
|  |  |  |  |  |  |  |  |  |  |  |
|  |  |  |  |  |  |  |  |  |  |  |
|  |  |  |  |  |  |  |  |  |  |  |
|  |  |  |  |  |  |  |  |  |  |  |
|  |  |  |  |  |  |  |  |  |  |  |
|  |  |  |  |  |  |  |  |  |  |  |
|  |  |  |  |  |  |  |  |  |  |  |
|  |  |  |  |  |  |  |  |  |  |  |
|  |  |  |  |  |  |  |  |  |  |  |
|  |  |  |  |  |  |  |  |  |  |  |
|  |  |  |  |  |  |  |  |  |  |  |
|  |  |  |  |  |  |  |  |  |  |  |
|  |  |  |  |  |  |  |  |  |  |  |
|  |  |  |  |  |  |  |  |  |  |  |
|  |  |  |  |  |  |  |  |  |  |  |
|  |  |  |  |  |  |  |  |  |  |  |
|  |  |  |  |  |  |  |  |  |  |  |
|  |  |  |  |  |  |  |  |  |  |  |
|  |  |  |  |  |  |  |  |  |  |  |
|  |  |  |  |  |  |  |  |  |  |  |
|  |  |  |  |  |  |  |  |  |  |  |
|  |  |  |  |  |  |  |  |  |  |  |
|  |  |  |  |  |  |  |  |  |  |  |
|  |  |  |  |  |  |  |  |  |  |  |
|  |  |  |  |  |  |  |  |  |  |  |
|  |  |  |  |  |  |  |  |  |  |  |
|  |  |  |  |  |  |  |  |  |  |  |
|  |  |  |  |  |  |  |  |  |  |  |
|  |  |  |  |  |  |  |  |  |  |  |
|  |  |  |  |  |  |  |  |  |  |  |
|  |  |  |  |  |  |  |  |  |  |  |
|  |  |  |  |  |  |  |  |  |  |  |
|  |  |  |  |  |  |  |  |  |  |  |
|  |  |  |  |  |  |  |  |  |  |  |
|  |  |  |  |  |  |  |  |  |  |  |
|  |  |  |  |  |  |  |  |  |  |  |
|  |  |  |  |  |  |  |  |  |  |  |
|  |  |  |  |  |  |  |  |  |  |  |
|  |  |  |  |  |  |  |  |  |  |  |
|  |  |  |  |  |  |  |  |  |  |  |
|  |  |  |  |  |  |  |  |  |  |  |
|  |  |  |  |  |  |  |  |  |  |  |
|  |  |  |  |  |  |  |  |  |  |  |
|  |  |  |  |  |  |  |  |  |  |  |
|  |  |  |  |  |  |  |  |  |  |  |
|  |  |  |  |  |  |  |  |  |  |  |
|  |  |  |  |  |  |  |  |  |  |  |
|  |  |  |  |  |  |  |  |  |  |  |
|  |  |  |  |  |  |  |  |  |  |  |
|  |  |  |  |  |  |  |  |  |  |  |
|  |  |  |  |  |  |  |  |  |  |  |
|  |  |  |  |  |  |  |  |  |  |  |
|  |  |  |  |  |  |  |  |  |  |  |
|  |  |  |  |  |  |  |  |  |  |  |
|  |  |  |  |  |  |  |  |  |  |  |
|  |  |  |  |  |  |  |  |  |  |  |
|  |  |  |  |  |  |  |  |  |  |  |
|  |  |  |  |  |  |  |  |  |  |  |
|  |  |  |  |  |  |  |  |  |  |  |
|  |  |  |  |  |  |  |  |  |  |  |
|  |  |  |  |  |  |  |  |  |  |  |
|  |  |  |  |  |  |  |  |  |  |  |
|  |  |  |  |  |  |  |  |  |  |  |
|  |  |  |  |  |  |  |  |  |  |  |
|  |  |  |  |  |  |  |  |  |  |  |
|  |  |  |  |  |  |  |  |  |  |  |
|  |  |  |  |  |  |  |  |  |  |  |
|  |  |  |  |  |  |  |  |  |  |  |
|  |  |  |  |  |  |  |  |  |  |  |
|  |  |  |  |  |  |  |  |  |  |  |
|  |  |  |  |  |  |  |  |  |  |  |
|  |  |  |  |  |  |  |  |  |  |  |
|  |  |  |  |  |  |  |  |  |  |  |
|  |  |  |  |  |  |  |  |  |  |  |
|  |  |  |  |  |  |  |  |  |  |  |
|  |  |  |  |  |  |  |  |  |  |  |
|  |  |  |  |  |  |  |  |  |  |  |
|  |  |  |  |  |  |  |  |  |  |  |
|  |  |  |  |  |  |  |  |  |  |  |
|  |  |  |  |  |  |  |  |  |  |  |
|  |  |  |  |  |  |  |  |  |  |  |
|  |  |  |  |  |  |  |  |  |  |  |
|  |  |  |  |  |  |  |  |  |  |  |
|  |  |  |  |  |  |  |  |  |  |  |
|  |  |  |  |  |  |  |  |  |  |  |
|  |  |  |  |  |  |  |  |  |  |  |
|  |  |  |  |  |  |  |  |  |  |  |
|  |  |  |  |  |  |  |  |  |  |  |
|  |  |  |  |  |  |  |  |  |  |  |
|  |  |  |  |  |  |  |  |  |  |  |
|  |  |  |  |  |  |  |  |  |  |  |
|  |  |  |  |  |  |  |  |  |  |  |
|  |  |  |  |  |  |  |  |  |  |  |
|  |  |  |  |  |  |  |  |  |  |  |
|  |  |  |  |  |  |  |  |  |  |  |
|  |  |  |  |  |  |  |  |  |  |  |
|  |  |  |  |  |  |  |  |  |  |  |
|  |  |  |  |  |  |  |  |  |  |  |
|  |  |  |  |  |  |  |  |  |  |  |
|  |  |  |  |  |  |  |  |  |  |  |
|  |  |  |  |  |  |  |  |  |  |  |
|  |  |  |  |  |  |  |  |  |  |  |
|  |  |  |  |  |  |  |  |  |  |  |
|  |  |  |  |  |  |  |  |  |  |  |
|  |  |  |  |  |  |  |  |  |  |  |
|  |  |  |  |  |  |  |  |  |  |  |
|  |  |  |  |  |  |  |  |  |  |  |
|  |  |  |  |  |  |  |  |  |  |  |
|  |  |  |  |  |  |  |  |  |  |  |
|  |  |  |  |  |  |  |  |  |  |  |
|  |  |  |  |  |  |  |  |  |  |  |
|  |  |  |  |  |  |  |  |  |  |  |
|  |  |  |  |  |  |  |  |  |  |  |
|  |  |  |  |  |  |  |  |  |  |  |
|  |  |  |  |  |  |  |  |  |  |  |
|  |  |  |  |  |  |  |  |  |  |  |
|  |  |  |  |  |  |  |  |  |  |  |
|  |  |  |  |  |  |  |  |  |  |  |
|  |  |  |  |  |  |  |  |  |  |  |
|  |  |  |  |  |  |  |  |  |  |  |
|  |  |  |  |  |  |  |  |  |  |  |
|  |  |  |  |  |  |  |  |  |  |  |
|  |  |  |  |  |  |  |  |  |  |  |
|  |  |  |  |  |  |  |  |  |  |  |
|  |  |  |  |  |  |  |  |  |  |  |
|  |  |  |  |  |  |  |  |  |  |  |
|  |  |  |  |  |  |  |  |  |  |  |
|  |  |  |  |  |  |  |  |  |  |  |
|  |  |  |  |  |  |  |  |  |  |  |
|  |  |  |  |  |  |  |  |  |  |  |
|  |  |  |  |  |  |  |  |  |  |  |
|  |  |  |  |  |  |  |  |  |  |  |
|  |  |  |  |  |  |  |  |  |  |  |
|  |  |  |  |  |  |  |  |  |  |  |
|  |  |  |  |  |  |  |  |  |  |  |
|  |  |  |  |  |  |  |  |  |  |  |
|  |  |  |  |  |  |  |  |  |  |  |
|  |  |  |  |  |  |  |  |  |  |  |
|  |  |  |  |  |  |  |  |  |  |  |
|  |  |  |  |  |  |  |  |  |  |  |
|  |  |  |  |  |  |  |  |  |  |  |
|  |  |  |  |  |  |  |  |  |  |  |
|  |  |  |  |  |  |  |  |  |  |  |
|  |  |  |  |  |  |  |  |  |  |  |
|  |  |  |  |  |  |  |  |  |  |  |
|  |  |  |  |  |  |  |  |  |  |  |
|  |  |  |  |  |  |  |  |  |  |  |
|  |  |  |  |  |  |  |  |  |  |  |
|  |  |  |  |  |  |  |  |  |  |  |
|  |  |  |  |  |  |  |  |  |  |  |
|  |  |  |  |  |  |  |  |  |  |  |
|  |  |  |  |  |  |  |  |  |  |  |
|  |  |  |  |  |  |  |  |  |  |  |
|  |  |  |  |  |  |  |  |  |  |  |
|  |  |  |  |  |  |  |  |  |  |  |
|  |  |  |  |  |  |  |  |  |  |  |
|  |  |  |  |  |  |  |  |  |  |  |
|  |  |  |  |  |  |  |  |  |  |  |
|  |  |  |  |  |  |  |  |  |  |  |
|  |  |  |  |  |  |  |  |  |  |  |
|  |  |  |  |  |  |  |  |  |  |  |
|  |  |  |  |  |  |  |  |  |  |  |
|  |  |  |  |  |  |  |  |  |  |  |
|  |  |  |  |  |  |  |  |  |  |  |
|  |  |  |  |  |  |  |  |  |  |  |
|  |  |  |  |  |  |  |  |  |  |  |
|  |  |  |  |  |  |  |  |  |  |  |
|  |  |  |  |  |  |  |  |  |  |  |
|  |  |  |  |  |  |  |  |  |  |  |
|  |  |  |  |  |  |  |  |  |  |  |
|  |  |  |  |  |  |  |  |  |  |  |
|  |  |  |  |  |  |  |  |  |  |  |
|  |  |  |  |  |  |  |  |  |  |  |
|  |  |  |  |  |  |  |  |  |  |  |
|  |  |  |  |  |  |  |  |  |  |  |
|  |  |  |  |  |  |  |  |  |  |  |
|  |  |  |  |  |  |  |  |  |  |  |
|  |  |  |  |  |  |  |  |  |  |  |
|  |  |  |  |  |  |  |  |  |  |  |
|  |  |  |  |  |  |  |  |  |  |  |
|  |  |  |  |  |  |  |  |  |  |  |
|  |  |  |  |  |  |  |  |  |  |  |
|  |  |  |  |  |  |  |  |  |  |  |
|  |  |  |  |  |  |  |  |  |  |  |
|  |  |  |  |  |  |  |  |  |  |  |
|  |  |  |  |  |  |  |  |  |  |  |
|  |  |  |  |  |  |  |  |  |  |  |
|  |  |  |  |  |  |  |  |  |  |  |
|  |  |  |  |  |  |  |  |  |  |  |
|  |  |  |  |  |  |  |  |  |  |  |
|  |  |  |  |  |  |  |  |  |  |  |
|  |  |  |  |  |  |  |  |  |  |  |
|  |  |  |  |  |  |  |  |  |  |  |
|  |  |  |  |  |  |  |  |  |  |  |
|  |  |  |  |  |  |  |  |  |  |  |
|  |  |  |  |  |  |  |  |  |  |  |
|  |  |  |  |  |  |  |  |  |  |  |
|  |  |  |  |  |  |  |  |  |  |  |
|  |  |  |  |  |  |  |  |  |  |  |
|  |  |  |  |  |  |  |  |  |  |  |
|  |  |  |  |  |  |  |  |  |  |  |
|  |  |  |  |  |  |  |  |  |  |  |
|  |  |  |  |  |  |  |  |  |  |  |
|  |  |  |  |  |  |  |  |  |  |  |
|  |  |  |  |  |  |  |  |  |  |  |
|  |  |  |  |  |  |  |  |  |  |  |
|  |  |  |  |  |  |  |  |  |  |  |



|           |                                                                  |               |               |                                |                        |                 |                                                  | Total isoflavones (>7.48 mg/day vs. 0–0.29 mg/day) | 0.79 (0.43 to 1.44) |                     |                |
|-----------|------------------------------------------------------------------|---------------|---------------|--------------------------------|------------------------|-----------------|--------------------------------------------------|----------------------------------------------------|---------------------|---------------------|----------------|
|           |                                                                  |               |               |                                |                        |                 |                                                  | Total lignans (>9.0 mg/day vs. 0–2.2 mg/day)       | 0.87 (0.49 to 1.55) |                     |                |
| 2008 Xu X | Long Island breast cancer study project (LIBCSP; mean 5.6 years) | United States | Prediagnostic | Premenopausal + Postmenopausal | In situ or invasive BC | Mean 58.8 years | 1,508 (Total death =198; BC-specific death =124) | Dietary folate (High vs. Low)                      | All-cause mortality | 0.79 (0.52 to 1.12) | Age and energy |
| Study     | Project (follow-up period)                                       | Countries     | Diagnostic    | Menopausal status              | BC stage               | Age             | Sample size (n)                                  | Exposures                                          | Outcomes            | HR/RR (95% CIs)     | Covariates     |
|           |                                                                  |               |               |                                |                        |                 |                                                  | Total folate (diet + supplements; High vs. Low)    |                     | 0.97 (0.69 to 1.36) |                |
|           |                                                                  |               |               |                                |                        |                 |                                                  | Vitamin B1 (thiamin; High vs. Low)                 |                     | 0.54 (0.38 to 0.88) |                |
|           |                                                                  |               |               |                                |                        |                 |                                                  | Vitamin B2 (riboflavin; High vs. Low)              |                     | 0.92 (0.58 to 1.44) |                |
|           |                                                                  |               |               |                                |                        |                 |                                                  | Vitamin B3 (niacin; High vs. Low)                  |                     | 0.61 (0.38 to 0.98) |                |
|           |                                                                  |               |               |                                |                        |                 |                                                  | Vitamin B6 (pyridoxine; High vs. Low)              |                     | 0.95 (0.61 to 1.48) |                |

|       |                            |           |            |                      |          |     |                    | Vitamin B12<br>(cobalamin;<br>High vs. Low)              | 1.20<br>(0.80 to 1.81) |                                     |            |
|-------|----------------------------|-----------|------------|----------------------|----------|-----|--------------------|----------------------------------------------------------|------------------------|-------------------------------------|------------|
|       |                            |           |            |                      |          |     |                    | Methionine<br>(High vs. Low)                             | 0.70<br>(0.44 to 1.13) |                                     |            |
|       |                            |           |            |                      |          |     |                    | Betaine<br>(High vs. Low)                                | 0.81<br>(0.54 to 1.20) |                                     |            |
|       |                            |           |            |                      |          |     |                    | Dietary folate<br>(High vs. Low)                         | 0.81<br>(0.47 to 1.39) |                                     |            |
|       |                            |           |            |                      |          |     |                    | Total folate<br>(diet +<br>supplements;<br>High vs. Low) | 1.24<br>(0.81 to 1.90) |                                     |            |
|       |                            |           |            |                      |          |     |                    | Vitamin B1<br>(thiamin; High<br>vs. Low)                 | 0.44<br>(0.24 to 0.81) | Breast cancer-specific<br>mortality |            |
|       |                            |           |            |                      |          |     |                    | Vitamin B2<br>(riboflavin; High<br>vs. Low)              | 0.72<br>(0.41 to 1.29) |                                     |            |
|       |                            |           |            |                      |          |     |                    | Vitamin B3<br>(niacin; High vs.<br>Low)                  | 0.61<br>(0.34 to 1.09) |                                     |            |
|       |                            |           |            |                      |          |     |                    | Vitamin B6<br>(pyridoxine;<br>High vs. Low)              | 0.77<br>(0.44 to 1.36) |                                     |            |
| Study | Project (follow-up period) | Countries | Diagnostic | Menopausal<br>status | BC stage | Age | Sample<br>size (n) | Exposures                                                | Outcomes               | HR/RR<br>(95% CIs)                  | Covariates |
|       |                            |           |            |                      |          |     |                    | Vitamin B12<br>(cobalamin;<br>High vs. Low)              | 1.10<br>(0.65 to 1.85) |                                     |            |
|       |                            |           |            |                      |          |     |                    | Methionine<br>(High vs. Low)                             | 0.70<br>(0.39 to 1.28) |                                     |            |
|       |                            |           |            |                      |          |     |                    | Betaine<br>(High vs. Low)                                | 0.72<br>(0.44 to 1.17) |                                     |            |

| 2009 Guha N | Life after cancer epidemiology study (LACE; mean 6.31 years) | United States | Prediagnostic | I-III A           | 1,954 (BC recurrence=282) | Breast cancer recurrence | Daidzein intake (>9,596.55 µg/day vs. 0 µg/day)    | 0.96 (0.52 to 1.76)                               | Soy supplement use, BMI 1 year before diagnosis, menopausal status, tobacco pack-years, tumor stage, ER status, age, race, kilocalories |                     |            |
|-------------|--------------------------------------------------------------|---------------|---------------|-------------------|---------------------------|--------------------------|----------------------------------------------------|---------------------------------------------------|-----------------------------------------------------------------------------------------------------------------------------------------|---------------------|------------|
|             |                                                              |               |               |                   |                           |                          | Genistein intake (>13,025.88 µg/day vs. 0 µg/day)  | 0.95 (0.52 to 1.75)                               |                                                                                                                                         |                     |            |
|             |                                                              |               |               |                   |                           |                          | Glycetin intake (>795.40 µg/day vs. 0-3.61 µg/day) | 0.80 (0.42 to 1.50)                               |                                                                                                                                         |                     |            |
|             |                                                              |               |               |                   |                           |                          | Daidzein intake (>9,596.55 µg/day vs. 0 µg/day)    | 1.74 (0.63 to 4.76)                               |                                                                                                                                         |                     |            |
|             |                                                              |               |               |                   |                           |                          | Genistein intake (>13,025.88 µg/day vs. 0 µg/day)  | 1.75 (0.65 to 4.76)                               |                                                                                                                                         |                     |            |
|             |                                                              |               |               |                   |                           |                          | Glycetin intake (>795.40 µg/day vs. 0-3.61 µg/day) | 1.60 (0.54 to 4.72)                               |                                                                                                                                         |                     |            |
| Study       | Project (follow-up period)                                   | Countries     | Diagnostic    | Menopausal status | BC stage                  | Age                      | Sample size (n)                                    | Exposures                                         | Outcomes                                                                                                                                | HR/RR (95% CIs)     | Covariates |
|             |                                                              |               |               | Postmenopausal    |                           |                          |                                                    | Daidzein intake (>9,596.55 µg/day vs. 0 µg/day)   |                                                                                                                                         | 0.70 (0.27 to 1.77) |            |
|             |                                                              |               |               |                   |                           |                          |                                                    | Genistein intake (>13,025.88 µg/day vs. 0 µg/day) |                                                                                                                                         | 0.69 (0.27 to 1.75) |            |

|              |                                                                    |                  |               |                                       |          |                       |                                                               |                                        |                                     |                        |                                                                                                                                                                                                                                                                                  |                        |  |
|--------------|--------------------------------------------------------------------|------------------|---------------|---------------------------------------|----------|-----------------------|---------------------------------------------------------------|----------------------------------------|-------------------------------------|------------------------|----------------------------------------------------------------------------------------------------------------------------------------------------------------------------------------------------------------------------------------------------------------------------------|------------------------|--|
|              |                                                                    |                  |               |                                       |          |                       |                                                               |                                        |                                     |                        | Glycetin intake<br>(>795.40 µg/day<br>vs. 0-3.61<br>µg/day)                                                                                                                                                                                                                      | 0.51<br>(0.18 to 1.38) |  |
| 2009 Kwan ML | Life after cancer<br>epidemiology study<br>(LACE; mean 5.93 years) | United<br>States | Prediagnostic | Premenopausal<br>1+<br>Postmenopausal | I-IIIa   | Mean<br>58.6<br>years | =213; BC-<br>specific<br>death<br>=121; BC<br>recurrence=256) | Prudent diet<br>pattern<br>(Q4 vs. Q1) | All-cause mortality                 | 0.57<br>(0.36 to 0.90) | Age at diagnosis,<br>total energy<br>intake (kcal),<br>race, BMI at<br>enrollment, total<br>physical activity,<br>smoking,<br>menopausal<br>status at<br>diagnosis, weight<br>change from<br>before diagnosis<br>to baseline, stage<br>of cancer,<br>hormone receptor<br>status, |                        |  |
|              |                                                                    |                  |               |                                       |          |                       |                                                               |                                        |                                     |                        |                                                                                                                                                                                                                                                                                  |                        |  |
|              |                                                                    |                  |               |                                       |          |                       |                                                               |                                        |                                     |                        |                                                                                                                                                                                                                                                                                  |                        |  |
|              |                                                                    |                  |               |                                       |          |                       |                                                               |                                        |                                     |                        |                                                                                                                                                                                                                                                                                  |                        |  |
|              |                                                                    |                  |               |                                       |          |                       |                                                               |                                        |                                     |                        |                                                                                                                                                                                                                                                                                  |                        |  |
| Study        | Project (follow-up period)                                         | Countries        | Diagnostic    | Menopausal<br>status                  | BC stage | Age                   | Sample<br>size (n)                                            | Exposures                              | Outcomes                            | HR/RR<br>(95% CIs)     | Covariates                                                                                                                                                                                                                                                                       |                        |  |
|              |                                                                    |                  |               |                                       |          |                       |                                                               | Western diet<br>pattern<br>(Q4 vs. Q1) |                                     | 1.53<br>(0.93 to 2.54) |                                                                                                                                                                                                                                                                                  |                        |  |
|              |                                                                    |                  |               |                                       |          |                       |                                                               | Prudent diet<br>pattern<br>(Q4 vs. Q1) | Breast cancer-specific<br>mortality | 0.79<br>(0.43 to 1.43) | treatment                                                                                                                                                                                                                                                                        |                        |  |
|              |                                                                    |                  |               |                                       |          |                       |                                                               | Western diet<br>pattern<br>(Q4 vs. Q1) |                                     | 1.20<br>(0.62 to 2.32) |                                                                                                                                                                                                                                                                                  |                        |  |
|              |                                                                    |                  |               |                                       |          |                       |                                                               | Prudent diet<br>pattern<br>(Q4 vs. Q1) | Breast cancer<br>recurrence         | 0.95<br>(0.63 to 1.43) |                                                                                                                                                                                                                                                                                  |                        |  |

|                  |                                                                 |           |                |                                |          |                   |                                       | Western diet pattern (Q4 vs. Q1)                     | 0.98 (0.62 to 1.54)                            |                                  |                                                                                                                                                                                                                   |
|------------------|-----------------------------------------------------------------|-----------|----------------|--------------------------------|----------|-------------------|---------------------------------------|------------------------------------------------------|------------------------------------------------|----------------------------------|-------------------------------------------------------------------------------------------------------------------------------------------------------------------------------------------------------------------|
| 2009 Shu XO      | Shanghai breast cancer survival study (SBCSS; median 3.9 years) | China     | Postdiagnostic | Premenopausal + Postmenopausal | I-IV     | 20 to 75 years    | 5,042 (Total death or recurrence=534) | Soy protein (>15.31 g/day vs. <5.31 g/day)           | All-cause mortality                            | 0.71 (0.54 to 0.92)              | Age at diagnosis, TNM stage, chemotherapy, radiotherapy, type of surgery received, BMI, menopausal status, ER/PR status, tamoxifen use, education level, income, cruciferous vegetable intake, total meat intake, |
|                  |                                                                 |           |                |                                |          |                   |                                       | Isoflavones (>62.68 mg/day vs. <20.00 mg/day)        |                                                | 0.79 (0.61 to 1.03)              |                                                                                                                                                                                                                   |
|                  |                                                                 |           |                |                                |          |                   |                                       | Soy protein (>15.31 g/day vs. <5.31 g/day)           | Breast cancer-specific mortality or recurrence | 0.68 (0.54 to 0.87)              |                                                                                                                                                                                                                   |
|                  |                                                                 |           |                |                                |          |                   |                                       | Isoflavones (>62.68 mg/day vs. <20.00 mg/day)        |                                                | 0.65 (0.51 to 0.84)              |                                                                                                                                                                                                                   |
| Study            | Project (follow-up period)                                      | Countries | Diagnostic     | Menopausal status              | BC stage | Age               | Sample size (n)                       | Exposures                                            | Outcomes                                       | HR/RR (95% CIs)                  | Covariates                                                                                                                                                                                                        |
|                  |                                                                 |           |                |                                |          |                   |                                       |                                                      |                                                |                                  | vitamin supplement use, tea consumption, physical activity                                                                                                                                                        |
| 2010 Hellmann SS | Copenhagen city heart study (CCHS; median 7.8 years)            | Denmark   | Prediagnostic  | Premenopausal + postmenopausal | -        | Median 66.9 years | 528 (Total death =323)                | Alcohol consumption (>14 units/week vs. 1 unit/week) | All-cause mortality                            | 1.06 (0.68 to 1.66)              | Alcohol, smoking, physical activity, BMI, HRT, age, disease stage, menopausal status, parity, education, adjuvant treatment                                                                                       |
|                  |                                                                 |           |                |                                |          |                   |                                       | Alcohol consumption                                  |                                                | Breast cancer-specific mortality |                                                                                                                                                                                                                   |

|              |                                                              |               |                |                                |             |                |                                         |                                                      |                                  |                     |                                                                                        |
|--------------|--------------------------------------------------------------|---------------|----------------|--------------------------------|-------------|----------------|-----------------------------------------|------------------------------------------------------|----------------------------------|---------------------|----------------------------------------------------------------------------------------|
|              |                                                              |               |                |                                |             |                | (>14 units/week vs. 1 unit/week)        |                                                      |                                  |                     | physical activity, BMI, HRT, age, disease stage, parity, education, adjuvant treatment |
|              |                                                              |               |                | Premenopausal                  |             |                | 85 (Total death =31)                    | Alcohol consumption (>14 units/week vs. 1 unit/week) | All-cause mortality              | 0.23 (0.03 to 1.54) |                                                                                        |
|              |                                                              |               |                | Postmenopausal                 |             |                | 443 (Total death =292)                  | Alcohol consumption (>14 units/week vs. 1 unit/week) |                                  | 0.93 (0.57 to 1.50) |                                                                                        |
| 2010 Kang X  | Harbin medical university (HMU; median 5.1 years)            | China         | Prediagnostic  | Premenopausal                  | I-III       | 29 to 72 years | 248 (Total death =76; BC recurrence=94) | Soy isoflavones (>42.3 mg/day vs. <15.2 mg/day)      | Breast cancer-specific mortality | 1.05 (0.78 to 1.71) | Age at diagnosis, TNM stage, ER/PR status,                                             |
| Study        | Project (follow-up period)                                   | Countries     | Diagnostic     | Menopausal status              | BC stage    | Age            | Sample size (n)                         | Exposures                                            | Outcomes                         | HR/RR (95% CIs)     | Covariates                                                                             |
|              |                                                              |               |                |                                |             |                |                                         | Soy isoflavones (>42.3 mg/day vs. <15.2 mg/day)      | Breast cancer recurrence         | 0.88 (0.61 to 1.23) |                                                                                        |
|              |                                                              |               |                | Postmenopausal                 |             |                | 276 (Total death =78; BC recurrence=91) | Soy isoflavones (>42.3 mg/day vs. <15.2 mg/day)      | Breast cancer-specific mortality | 0.88 (0.56 to 1.24) | chemotherapy, radiotherapy                                                             |
|              |                                                              |               |                |                                |             |                |                                         | Soy isoflavones (>42.3 mg/day vs. <15.2 mg/day)      | Breast cancer recurrence         | 0.67 (0.54 to 0.85) |                                                                                        |
| 2010 Kwan ML | Life after cancer epidemiology study (LACE; mean 7.42 years) | United States | Postdiagnostic | Premenopausal + Postmenopausal | Invasive BC | 18 to 70 years | 1,897 (Total death =273; BC-specific    | Total alcohol (>6.0 g/day vs. None)                  | All-cause mortality              | 1.19 (0.87 to 1.62) | Age at diagnosis, prediagnosis BMI, total folate intake, stage of disease, hormone     |
|              |                                                              |               |                |                                |             |                |                                         | Wine                                                 |                                  | 1.08 (0.77 to 1.52) |                                                                                        |

|                    |                                                 |                  |                |                                           |                |                   |                                                            |                                     |                             |                        |                                                                             |
|--------------------|-------------------------------------------------|------------------|----------------|-------------------------------------------|----------------|-------------------|------------------------------------------------------------|-------------------------------------|-----------------------------|------------------------|-----------------------------------------------------------------------------|
|                    |                                                 |                  |                |                                           |                |                   | death<br>=154; BC<br>recurren<br>ce =185)                  | (>2<br>servings/week<br>vs. None)   |                             |                        | receptor status,<br>tamoxifen use,<br>treatment,<br>positive lymph<br>nodes |
|                    |                                                 |                  |                |                                           |                |                   | Total alcohol<br>(>6.0 g/day vs.<br>None)                  |                                     | Breast cancer-specific      | 1.51<br>(1.00 to 2.29) |                                                                             |
|                    |                                                 |                  |                |                                           |                |                   | Wine<br>(>2<br>servings/week<br>vs. None)                  |                                     | mortality                   | 1.37<br>(0.88 to 2.14) |                                                                             |
|                    |                                                 |                  |                |                                           |                |                   | Total alcohol<br>(>6.0 g/day vs.<br>None)                  |                                     |                             | 1.35<br>(1.00 to 1.83) |                                                                             |
|                    |                                                 |                  |                |                                           |                |                   | Wine<br>(>2<br>servings/week<br>vs. None)                  |                                     | Breast cancer<br>recurrence | 1.33<br>(0.97 to 1.81) |                                                                             |
|                    |                                                 |                  |                |                                           |                |                   |                                                            |                                     |                             |                        |                                                                             |
| 2011 Beasley<br>JM | Collaborative women’s<br>longevity study (CWLS; | United<br>States | Postdiagnostic | Premenopausa<br>l +<br>Postmenopaus<br>al | Invasive<br>BC | 20 to 79<br>years | 4,441<br>(Total<br>death<br>=525; BC-<br>specific<br>death | Total fat<br>(Q5 vs. Q1)            | All-cause mortality         | 1.05<br>(0.79 to 1.39) | Age, state of<br>residence,<br>menopausal<br>status, smoking,               |
| Study              | Project (follow-up period)                      | Countries        | Diagnostic     | Menopausal<br>status                      | BC stage       | Age               | Sample<br>size (n)                                         | Exposures                           | Outcomes                    | HR/RR<br>(95% CIs)     | Covariates                                                                  |
|                    |                                                 |                  |                |                                           |                |                   | =137)                                                      | Saturated fat<br>(Q5 vs. Q1)        |                             | 1.41<br>(1.06 to 1.87) | Breast cancer<br>stage, alcohol,                                            |
|                    |                                                 |                  |                |                                           |                |                   |                                                            | Trans fat<br>(Q5 vs. Q1)            |                             | 1.78<br>(1.35 to 2.32) | history of HRT,<br>interval between                                         |
|                    |                                                 |                  |                |                                           |                |                   |                                                            | Monounsaturate<br>d fat (Q5 vs. Q1) |                             | 1.14<br>(0.86 to 1.52) | diagnosis and                                                               |
|                    |                                                 |                  |                |                                           |                |                   |                                                            | Polyunsaturated<br>fat (Q5 vs. Q1)  |                             | 0.91<br>(0.70 to 1.19) | diet assessment,                                                            |
|                    |                                                 |                  |                |                                           |                |                   |                                                            | Carbohydrates<br>(Q5 vs. Q1)        |                             | 0.97<br>(0.72 to 1.30) | energy intake,<br>breast cancer<br>treatment, BMI,<br>physical activity     |

|       |                            |           |            |                   |          |     |                 | Protein<br>(Q5 vs. Q1)            | 0.98<br>(0.73 to 1.31) |                        |            |
|-------|----------------------------|-----------|------------|-------------------|----------|-----|-----------------|-----------------------------------|------------------------|------------------------|------------|
|       |                            |           |            |                   |          |     |                 | Alcohol<br>(Q5 vs. Q1)            | 0.78<br>(0.60 to 1.01) |                        |            |
|       |                            |           |            |                   |          |     |                 | Vitamin A<br>(Q5 vs. Q1)          | 1.12<br>(0.84 to 1.50) |                        |            |
|       |                            |           |            |                   |          |     |                 | alpha-Carotene<br>(Q5 vs. Q1)     | 1.08<br>(0.81 to 1.43) |                        |            |
|       |                            |           |            |                   |          |     |                 | beta-Carotene<br>(Q5 vs. Q1)      | 1.17<br>(0.88 to 1.57) |                        |            |
|       |                            |           |            |                   |          |     |                 | beta-Cryptoxanthin<br>(Q5 vs. Q1) | 1.25<br>(0.93 to 1.68) |                        |            |
|       |                            |           |            |                   |          |     |                 | Lutein/zeaxanthin<br>(Q5 vs. Q1)  | 1.05<br>(0.77 to 1.43) |                        |            |
|       |                            |           |            |                   |          |     |                 | Lycopene<br>(Q5 vs. Q1)           | 1.11<br>(0.83 to 1.47) |                        |            |
|       |                            |           |            |                   |          |     |                 | Fiber (Q5 vs. Q1)                 | 0.75<br>(0.52 to 1.09) |                        |            |
|       |                            |           |            |                   |          |     |                 | Whole grain<br>(Q5 vs. Q1)        | 0.79<br>(0.59 to 1.08) |                        |            |
|       |                            |           |            |                   |          |     |                 | Calcium<br>(Q5 vs. Q1)            | 0.74<br>(0.53 to 1.02) |                        |            |
|       |                            |           |            |                   |          |     |                 | Vitamin D<br>(Q5 vs. Q1)          | 0.86<br>(0.64 to 1.16) |                        |            |
|       |                            |           |            |                   |          |     |                 | Dairy (Q4 vs. Q1)                 | 1.18<br>(0.90 to 1.54) |                        |            |
|       |                            |           |            |                   |          |     |                 | Meat (Q4 vs. Q1)                  | 1.12<br>(0.83 to 1.51) |                        |            |
| Study | Project (follow-up period) | Countries | Diagnostic | Menopausal status | BC stage | Age | Sample size (n) | Exposures                         | Outcomes               | HR/RR (95% CIs)        | Covariates |
|       |                            |           |            |                   |          |     |                 | Vegetables<br>(Q4 vs. Q1)         |                        | 1.44<br>(0.91 to 2.27) |            |



|                                          |                        |
|------------------------------------------|------------------------|
| Cruciferous<br>vegetables<br>(Q4 vs. Q1) | 1.02<br>(0.80 to 1.30) |
| Fruit (Q4 vs. Q1)                        | 1.38<br>(0.88 to 2.17) |
| Total fat<br>(Q5 vs. Q1)                 | 0.92<br>(0.53 to 1.60) |
| Saturated fat<br>(Q5 vs. Q1)             | 1.55<br>(0.88 to 2.75) |
| Trans fat<br>(Q5 vs. Q1)                 | 1.42<br>(0.80 to 2.52) |
| Monounsaturated fat (Q5 vs. Q1)          | 0.89<br>(0.49 to 1.60) |
| Polyunsaturated fat (Q5 vs. Q1)          | 0.90<br>(0.52 to 1.55) |
| Carbohydrates<br>(Q5 vs. Q1)             | 0.93<br>(0.54 to 1.62) |
| Protein<br>(Q5 vs. Q1)                   | 1.19<br>(0.66 to 2.14) |
| Alcohol<br>(Q5 vs. Q1)                   | 1.27<br>(0.76 to 2.14) |
| Vitamin A<br>(Q5 vs. Q1)                 | 1.24<br>(0.68 to 2.24) |
| alpha-Carotene<br>(Q5 vs. Q1)            | 0.98<br>(0.59 to 1.64) |
| beta-Carotene<br>(Q5 vs. Q1)             | 1.05<br>(0.60 to 1.86) |
| beta-Cryptoxanthin<br>(Q5 vs. Q1)        | 0.81<br>(0.45 to 1.45) |
| Lutein/zeaxanthin (Q5 vs. Q1)            | 1.16<br>(0.62 to 2.19) |
| Lycopene<br>(Q5 vs. Q1)                  | 1.42<br>(0.80 to 2.50) |

|               |                                                                 |               |                |                                |          |                 |                                                | Fiber (Q5 vs. Q1)                             |                     | 0.75<br>(0.38 to 1.49) |                                                                           |
|---------------|-----------------------------------------------------------------|---------------|----------------|--------------------------------|----------|-----------------|------------------------------------------------|-----------------------------------------------|---------------------|------------------------|---------------------------------------------------------------------------|
|               |                                                                 |               |                |                                |          |                 |                                                | Whole grain (Q5 vs. Q1)                       |                     | 0.83<br>(0.46 to 1.48) |                                                                           |
| Study         | Project (follow-up period)                                      | Countries     | Diagnostic     | Menopausal status              | BC stage | Age             | Sample size (n)                                | Exposures                                     | Outcomes            | HR/RR (95% CIs)        | Covariates                                                                |
|               |                                                                 |               |                |                                |          |                 |                                                | Calcium (Q5 vs. Q1)                           |                     | 0.59<br>(0.32 to 1.08) |                                                                           |
|               |                                                                 |               |                |                                |          |                 |                                                | Vitamin D (Q5 vs. Q1)                         |                     | 1.02<br>(0.58 to 1.79) |                                                                           |
|               |                                                                 |               |                |                                |          |                 |                                                | Dairy (Q4 vs. Q1)                             |                     | 0.94<br>(0.56 to 1.59) |                                                                           |
|               |                                                                 |               |                |                                |          |                 |                                                | Meat (Q4 vs. Q1)                              |                     | 0.89<br>(0.50 to 1.60) |                                                                           |
|               |                                                                 |               |                |                                |          |                 |                                                | Vegetables (Q4 vs. Q1)                        |                     | 0.96<br>(0.38 to 2.45) |                                                                           |
|               |                                                                 |               |                |                                |          |                 |                                                | Cruciferous vegetables (Q4 vs. Q1)            |                     | 0.95<br>(0.59 to 1.54) |                                                                           |
|               |                                                                 |               |                |                                |          |                 |                                                | Fruit (Q4 vs. Q1)                             |                     | 1.39<br>(0.64 to 2.99) |                                                                           |
|               |                                                                 |               |                |                                |          |                 |                                                | Carbohydrates (>212.9 g/day vs. <110.9 g/day) |                     | 0.99<br>(0.39 to 2.50) | Fiber, folate intake, tumor stage, treatment, tamoxifen use               |
|               |                                                                 |               |                |                                |          |                 | 688 (Total death                               | Glycemic index (Q4 vs. Q1)                    |                     | 1.40<br>(0.78 to 2.50) | Physical activity, tumor stage, treatment, tamoxifen use                  |
| 2011 Belle FN | Health, eating, activity and lifestyle (HEAL; median 6.7 years) | United States | Postdiagnostic | Premenopausal + Postmenopausal | I-III A  | Mean 55.3 years | =106; BC-specific death =83; BC recurrence=82) | Glycemic load (Q4 vs. Q1)                     | All-cause mortality | 1.23<br>(0.46 to 3.31) | Total energy intake, folate intake, fiber intake, tumor stage, treatment, |

| Study | Project (follow-up period) | Countries | Diagnostic | Menopausal status | BC stage | Age | Sample size (n) | Exposures                                     | Outcomes                         | HR/RR (95% CIs)     | Covariates                                                                                 |
|-------|----------------------------|-----------|------------|-------------------|----------|-----|-----------------|-----------------------------------------------|----------------------------------|---------------------|--------------------------------------------------------------------------------------------|
|       |                            |           |            |                   |          |     |                 | Fiber (>18.3 g/day vs. <8.8 g/day)            |                                  | 0.53 (0.23 to 1.23) | tamoxifen use<br>Total energy intake, folate intake, tumor stage, treatment, tamoxifen use |
|       |                            |           |            |                   |          |     |                 | Carbohydrates (>212.9 g/day vs. <110.9 g/day) |                                  | 0.76 (0.27 to 2.17) | Fiber, folate intake, tumor stage, treatment, tamoxifen use                                |
|       |                            |           |            |                   |          |     |                 | Glycemic index (Q4 vs. Q1)                    | Breast cancer-specific mortality | 1.60 (0.80 to 3.21) | Physical activity, tumor stage, treatment, tamoxifen use                                   |
|       |                            |           |            |                   |          |     |                 | Glycemic load (Q4 vs. Q1)                     |                                  | 1.11 (0.37 to 3.34) | Total energy intake, folate intake, fiber intake, tumor stage, treatment, tamoxifen use    |
| Study | Project (follow-up period) | Countries | Diagnostic | Menopausal status | BC stage | Age | Sample size (n) | Exposures                                     | Outcomes                         | HR/RR (95% CIs)     | Covariates                                                                                 |
|       |                            |           |            |                   |          |     |                 | Fiber (>18.3 g/day vs. <8.8 g/day)            |                                  | 0.68 (0.27 to 1.70) | Total energy intake, folate intake, tumor stage, treatment, tamoxifen use                  |
|       |                            |           |            |                   |          |     |                 | Carbohydrates (>212.9 g/day vs. <110.9 g/day) | Breast cancer recurrence         | 0.77 (0.27 to 2.19) | Fiber, folate intake, tumor stage, treatment, tamoxifen use                                |

|              |                                                                 |                  |                |                                        |          |                |                                                             | Glycemic index<br>(Q4 vs. Q1)               |                             | 1.56<br>(0.77 to 3.13) | Physical activity,<br>tumor stage,<br>treatment,<br>tamoxifen use                                                                                                                                                                                          |
|--------------|-----------------------------------------------------------------|------------------|----------------|----------------------------------------|----------|----------------|-------------------------------------------------------------|---------------------------------------------|-----------------------------|------------------------|------------------------------------------------------------------------------------------------------------------------------------------------------------------------------------------------------------------------------------------------------------|
|              |                                                                 |                  |                |                                        |          |                |                                                             | Glycemic load<br>(Q4 vs. Q1)                |                             | 1.14<br>(0.38 to 3.44) | Total energy<br>intake, folate<br>intake, fiber<br>intake, tumor<br>stage, treatment,<br>tamoxifen use                                                                                                                                                     |
|              |                                                                 |                  |                |                                        |          |                |                                                             | Fiber<br>(>18.3 g/day vs.<br><8.8 g/day)    |                             | 0.68<br>(0.27 to 1.70) | Total energy<br>intake, folate                                                                                                                                                                                                                             |
| Study        | Project (follow-up period)                                      | Countries        | Diagnostic     | Menopausal<br>status                   | BC stage | Age            | Sample<br>size (n)                                          | Exposures                                   | Outcomes                    | HR/RR<br>(95% CIs)     | Covariates                                                                                                                                                                                                                                                 |
|              |                                                                 |                  |                |                                        |          |                |                                                             |                                             |                             |                        | intake, tumor<br>stage, treatment,<br>tamoxifen use                                                                                                                                                                                                        |
|              |                                                                 |                  |                |                                        |          |                |                                                             | Total isoflavone<br>(Level 4 vs.<br>Level1) | All-cause mortality         | 0.46<br>(0.20 to 1.05) | Stage, grade,<br>ER/PR status,<br>menopausal<br>status,<br>chemotherapy<br>treatment,<br>radiation, age,<br>education, race,<br>soy supplements,<br>intervention<br>group, presence<br>of hot flash<br>symptoms and<br>their interaction,<br>tamoxifen use |
| 2011 Caan BJ | Women's health eating and<br>living (WHEL; median 7.3<br>years) | United<br>States | Postdiagnostic | Premenopausal<br>1 +<br>Postmenopausal | I-III    | 18-70<br>years | 2,736<br>(Total<br>death<br>=271; BC<br>recurrence<br>=448) | Total isoflavone<br>(Level 4 vs.<br>Level1) | Breast cancer<br>recurrence | 0.78<br>(0.46 to 1.31) |                                                                                                                                                                                                                                                            |

| 2011 George SM | Health, eating, activity and                          | United States | Postdiagnostic | Premenopausal<br>1+<br>Postmenopausal | I-III          | Mean<br>57.9<br>years | 670<br>(Total<br>death<br>=62; BC-<br>specific<br>death<br>=24)     | HEI-2005<br>(Q4 vs. Q1)                      | All-cause mortality                 | 0.40<br>(0.17 to 0.94) | Energy intake,<br>physical activity,                                                                                                                                                                                                                                                                                |
|----------------|-------------------------------------------------------|---------------|----------------|---------------------------------------|----------------|-----------------------|---------------------------------------------------------------------|----------------------------------------------|-------------------------------------|------------------------|---------------------------------------------------------------------------------------------------------------------------------------------------------------------------------------------------------------------------------------------------------------------------------------------------------------------|
| Study          | Project (follow-up period)                            | Countries     | Diagnostic     | Menopausal<br>status                  | BC stage       | Age                   | Sample<br>size (n)                                                  | Exposures                                    | Outcomes                            | HR/RR<br>(95% CIs)     | Covariates                                                                                                                                                                                                                                                                                                          |
|                | lifestyle (HEAL; mean 6<br>years)                     |               |                |                                       |                |                       |                                                                     | HEI-2005<br>(Q4 vs. Q1)                      | Breast cancer-specific<br>mortality | 0.12<br>(0.02 to 0.99) | race, stage,<br>tamoxifen use,<br>BMI                                                                                                                                                                                                                                                                               |
| 2011 Kim EHJ   | Nurses' health study (NHS;<br>1978-1998 through 2004) | United States | Postdiagnostic | Premenopausal<br>1+<br>Postmenopausal | I-III          | 30 to 55<br>years     | 2,729<br>(Total<br>death<br>=572; BC-<br>specific<br>death<br>=302) | AHEI (Q5 vs.<br>Q1)                          | All-cause mortality                 | 0.85<br>(0.63 to 1.17) | Time since<br>diagnosis, age,<br>alcohol intake,<br>energy,<br>multivitamins,<br>BMI, weight<br>change, oral<br>contraceptive<br>use, smoking<br>status, physical<br>activity, stage,<br>categories of<br>treatment, age at<br>first birth and<br>parity,<br>menopausal<br>status,<br>postmenopausal<br>hormone use |
|                |                                                       |               |                |                                       |                |                       |                                                                     | DQIR<br>(Q5 vs. Q1)                          |                                     | 0.78<br>(0.58 to 1.07) |                                                                                                                                                                                                                                                                                                                     |
|                |                                                       |               |                |                                       |                |                       |                                                                     | RFS (Q5 vs. Q1)                              |                                     | 1.03<br>(0.74 to 1.42) |                                                                                                                                                                                                                                                                                                                     |
|                |                                                       |               |                |                                       |                |                       |                                                                     | aMED<br>(Q5 vs. Q1)                          |                                     | 0.87<br>(0.64 to 1.17) |                                                                                                                                                                                                                                                                                                                     |
|                |                                                       |               |                |                                       |                |                       |                                                                     | AHEI (Q5 vs.<br>Q1)                          | Breast cancer-specific<br>mortality | 1.53<br>(0.98 to 2.39) |                                                                                                                                                                                                                                                                                                                     |
|                |                                                       |               |                |                                       |                |                       |                                                                     | DQIR<br>(Q5 vs. Q1)                          |                                     | 0.81<br>(0.53 to 1.24) |                                                                                                                                                                                                                                                                                                                     |
|                |                                                       |               |                |                                       |                |                       |                                                                     | RFS (Q5 vs. Q1)                              |                                     | 1.54<br>(0.95 to 2.47) |                                                                                                                                                                                                                                                                                                                     |
|                |                                                       |               |                |                                       |                |                       |                                                                     | aMED<br>(Q5 vs. Q1)                          |                                     | 1.15<br>(0.74 to 1.77) |                                                                                                                                                                                                                                                                                                                     |
| 2011 Kwan ML   | Life after cancer                                     | United States | Postdiagnostic | Premenopausal<br>1+                   | Invasive<br>BC | Mean<br>58 years      | 2,236<br>(Total                                                     | Multivitamins<br>supplements<br>(Yes vs. No) | All-cause mortality                 | 0.92<br>(0.71 to 1.19) | Age at diagnosis,<br>race/ethnicity,                                                                                                                                                                                                                                                                                |

| Study                           | Project (follow-up period) | Countries | Diagnostic                           | Postmenopausal<br>Menopausal status | BC stage | Age | death<br>=396;<br>Sample size (n)             | Exposures                                                      | Outcomes                         | HR/RR<br>(95% CIs)     | Covariates                                                                                                                                                                                |
|---------------------------------|----------------------------|-----------|--------------------------------------|-------------------------------------|----------|-----|-----------------------------------------------|----------------------------------------------------------------|----------------------------------|------------------------|-------------------------------------------------------------------------------------------------------------------------------------------------------------------------------------------|
| epidemiology (LACE; 8.33 years) |                            |           | Prediagnostic<br>+<br>Postdiagnostic |                                     |          |     | BC-specific death<br>=212; BC recurrence =380 | Multivitamins supplements (Yes vs. No)                         | Breast cancer-specific mortality | 0.87<br>(0.60 to 1.24) | education, positive nodes, stage, hormone Receptor status, treatment, pre-diagnosis BMI, other antioxidant use, smoking, non-sedentary physical activity, fruit and vegetable consumption |
|                                 |                            |           |                                      |                                     |          |     |                                               | Multivitamins supplements (Yes vs. No)                         | Breast cancer recurrence         | 0.92<br>(0.71 to 1.20) |                                                                                                                                                                                           |
|                                 |                            |           |                                      |                                     |          |     |                                               | Multivitamins supplements (Persistent use vs. Never use)       |                                  | 0.79<br>(0.56 to 1.12) |                                                                                                                                                                                           |
|                                 |                            |           |                                      |                                     |          |     |                                               | Fruit and vegetable consumption (Persistent use vs. Never use) | All-cause mortality              | 0.28<br>(0.11 to 0.72) |                                                                                                                                                                                           |
|                                 |                            |           |                                      |                                     |          |     |                                               | Multivitamins supplements (Persistent use vs. Never use)       |                                  | 0.70<br>(0.44 to 1.11) |                                                                                                                                                                                           |
|                                 |                            |           |                                      |                                     |          |     |                                               | Fruit and vegetable consumption (Persistent use vs. Never use) | Breast cancer-specific mortality | 0.48<br>(0.11 to 2.03) |                                                                                                                                                                                           |
|                                 |                            |           |                                      |                                     |          |     |                                               | Multivitamins supplements (Persistent use vs. Never use)       |                                  | 0.76<br>(0.54 to 1.06) |                                                                                                                                                                                           |
|                                 |                            |           |                                      |                                     |          |     |                                               | Fruit and vegetable consumption                                | Breast cancer recurrence         | 0.58<br>(0.25 to 1.36) |                                                                                                                                                                                           |

| (Persistent use vs. Never use) |                                                        |           |                |                   |             |                |                                                  |                                                                           |                          |                     |                                                                                                                                                                                       |
|--------------------------------|--------------------------------------------------------|-----------|----------------|-------------------|-------------|----------------|--------------------------------------------------|---------------------------------------------------------------------------|--------------------------|---------------------|---------------------------------------------------------------------------------------------------------------------------------------------------------------------------------------|
| 2011 Nechuta S                 | Shanghai breast cancer survival study (SBCSS; mean 4.1 | China     | Postdiagnostic | -                 | Invasive BC | 20 to 75 years | 4,877 (Total death =444; BC-specific death =389) | Multivitamins supplements (Postdiagnosis use vs. Never postdiagnosis use) | All-cause mortality      | 0.82 (0.57 to 1.17) | ER/PR status, TNM stage, chemotherapy, radiotherapy,                                                                                                                                  |
| Study                          | Project (follow-up period)                             | Countries | Diagnostic     | Menopausal status | BC stage    | Age            | Sample size (n)                                  | Exposures                                                                 | Outcomes                 | HR/RR (95% CIs)     | Covariates                                                                                                                                                                            |
|                                |                                                        |           |                |                   |             |                |                                                  | Vitamin E supplements (Postdiagnosis use vs. Never postdiagnosis use)     |                          | 0.71 (0.46 to 1.11) |                                                                                                                                                                                       |
|                                |                                                        |           |                |                   |             |                |                                                  | Vitamin C supplements (Postdiagnosis use vs. Never postdiagnosis use)     |                          | 0.81 (0.61 to 1.07) | Tamoxifen use, education, income, BMI, regular tea consumption, regular exercise participation, daily cruciferous vegetable intake, daily soy protein intake, other vitamin variables |
|                                |                                                        |           |                |                   |             |                |                                                  | Antioxidant supplements (Postdiagnosis use vs. Never postdiagnosis use)   |                          | 0.82 (0.65 to 1.02) |                                                                                                                                                                                       |
|                                |                                                        |           |                |                   |             |                |                                                  | Multivitamins supplements (Postdiagnosis use vs. Never postdiagnosis use) | Breast cancer recurrence | 0.74 (0.53 to 1.03) |                                                                                                                                                                                       |

|               |                                                            |               |                |                   |          |               |                          | Vitamin E supplements (Postdiagnosis use vs. Never postdiagnosis use)                       | 0.65<br>(0.43 to 0.97) |                        |                                                                                                                      |
|---------------|------------------------------------------------------------|---------------|----------------|-------------------|----------|---------------|--------------------------|---------------------------------------------------------------------------------------------|------------------------|------------------------|----------------------------------------------------------------------------------------------------------------------|
|               |                                                            |               |                |                   |          |               |                          | Vitamin C supplements (Postdiagnosis use vs. Never postdiagnosis use)                       | 0.81<br>(0.63 to 1.03) |                        |                                                                                                                      |
|               |                                                            |               |                |                   |          |               |                          | Antioxidant supplements (Postdiagnosis use vs. Never postdiagnosis use)                     | 0.78<br>(0.61 to 0.95) |                        |                                                                                                                      |
| Study         | Project (follow-up period)                                 | Countries     | Diagnostic     | Menopausal status | BC stage | Age           | Sample size (n)          | Exposures                                                                                   | Outcomes               | HR/RR (95% CIs)        | Covariates                                                                                                           |
|               |                                                            |               |                |                   |          |               |                          | use)                                                                                        |                        |                        |                                                                                                                      |
| 2011 Saquib J | Women's healthy eating and living (WHEL; median 9.0 years) | United States | Postdiagnostic | -                 | I-III A  | Mean 53 years | 2,939 (Total death =388) | Retinol supplements (Upper limit for each micronutrient vs. Adequate micronutrients intake) | All-cause mortality    | 0.90<br>(0.61 to 1.48) | Age at randomization, tumor stage, tumor grade, time since diagnosis, BMI, smoking, randomization group, hot flashes |
|               |                                                            |               |                |                   |          |               |                          | Niacin supplements (Upper limit for each micronutrient vs. Adequate                         |                        | 1.02<br>(0.83 to 1.26) |                                                                                                                      |



|       |                            |           |            |                      |          |     |                    | micronutrients<br>intake)                                                                                           |                        |                    |            |
|-------|----------------------------|-----------|------------|----------------------|----------|-----|--------------------|---------------------------------------------------------------------------------------------------------------------|------------------------|--------------------|------------|
|       |                            |           |            |                      |          |     |                    | Vitamin B6<br>supplements<br>(Upper limit for<br>each<br>micronutrient<br>vs. Adequate<br>micronutrients<br>intake) | 0.90<br>(0.63 to 1.53) |                    |            |
|       |                            |           |            |                      |          |     |                    | Folate<br>supplements<br>(Upper limit for<br>each<br>micronutrient<br>vs. Adequate<br>micronutrients<br>intake)     | 1.30<br>(0.89 to 1.78) |                    |            |
|       |                            |           |            |                      |          |     |                    | Vitamin C<br>supplements<br>(Upper limit for<br>each<br>micronutrient<br>vs. Adequate<br>micronutrients<br>intake)  | 1.10<br>(0.79 to 1.60) |                    |            |
| Study | Project (follow-up period) | Countries | Diagnostic | Menopausal<br>status | BC stage | Age | Sample<br>size (n) | Exposures                                                                                                           | Outcomes               | HR/RR<br>(95% CIs) | Covariates |
|       |                            |           |            |                      |          |     |                    | Vitamin E<br>supplements<br>(Upper limit for<br>each<br>micronutrient<br>vs. Adequate                               | 1.60<br>(0.73 to 3.71) |                    |            |

|  |                  |                |
|--|------------------|----------------|
|  | micronutrients   |                |
|  | intake)          |                |
|  | Vitamin D        |                |
|  | supplements      |                |
|  | (Upper limit for |                |
|  | each             | 0.90           |
|  | micronutrient    | (0.13 to 7.11) |
|  | vs. Adequate     |                |
|  | micronutrients   |                |
|  | intake)          |                |
|  | Calcium          |                |
|  | supplements      |                |
|  | (Upper limit for |                |
|  | each             | 1.10           |
|  | micronutrient    | (0.68 to 1.71) |
|  | vs. Adequate     |                |
|  | micronutrients   |                |
|  | intake)          |                |
|  | Iron             |                |
|  | supplements      |                |
|  | (Upper limit for |                |
|  | each             | 1.30           |
|  | micronutrient    | (0.93 to 1.97) |
|  | vs. Adequate     |                |
|  | micronutrients   |                |
|  | intake)          |                |
|  | Magnesium        |                |
|  | supplements      |                |
|  | (Upper limit for |                |
|  | each             | 1.03           |
|  | micronutrient    | (0.69 to 1.53) |
|  | vs. Adequate     |                |
|  | micronutrients   |                |
|  | intake)          |                |

| Study              | Project (follow-up period)                                  | Countries        | Diagnostic     | Menopausal status | BC stage | Age                   | Sample size (n)                                                                               | Selenium supplements                                                                                          | 1.50<br>(0.78 to 2.96) | Covariates                                                                                                                                                                                                                                                        |
|--------------------|-------------------------------------------------------------|------------------|----------------|-------------------|----------|-----------------------|-----------------------------------------------------------------------------------------------|---------------------------------------------------------------------------------------------------------------|------------------------|-------------------------------------------------------------------------------------------------------------------------------------------------------------------------------------------------------------------------------------------------------------------|
|                    |                                                             |                  |                |                   |          |                       |                                                                                               | Exposures                                                                                                     | HR/RR<br>(95% CIs)     |                                                                                                                                                                                                                                                                   |
| 2012 Greenlee<br>H | Life after cancer<br>epidemiology (LACE;<br>mean 8.3 years) | United<br>States | Postdiagnostic | -                 | I-III A  | Mean<br>58.3<br>years | 2,264<br>(Total<br>death<br>=393; BC-<br>specific<br>death<br>=214; BC<br>recurrence<br>=375) | (Upper limit for<br>each<br>micronutrient<br>vs. Adequate<br>micronutrients<br>intake)                        |                        | Age at diagnosis,<br>race, education,<br>breast cancer<br>stage at<br>diagnosis,<br>number positive<br>lymph nodes,<br>tumor hormone<br>receptor status,<br>chemotherapy,<br>radiation<br>therapy, BMI,<br>smoking, alcohol<br>consumption,<br>physical activity, |
|                    |                                                             |                  |                |                   |          |                       |                                                                                               | Zinc<br>supplements<br>(Upper limit for<br>each<br>micronutrient<br>vs. Adequate<br>micronutrients<br>intake) | 1.00<br>(0.68 to 1.48) |                                                                                                                                                                                                                                                                   |
|                    |                                                             |                  |                |                   |          |                       |                                                                                               | Multivitamins<br>supplements<br>(Frequent use<br>vs. No use)                                                  | 0.84<br>(0.65 to 1.08) |                                                                                                                                                                                                                                                                   |
|                    |                                                             |                  |                |                   |          |                       |                                                                                               | Vitamin C<br>supplements<br>(Frequent use<br>vs. No use)                                                      | 0.78<br>(0.61 to 1.01) |                                                                                                                                                                                                                                                                   |
|                    |                                                             |                  |                |                   |          |                       |                                                                                               | Vitamin E<br>supplements<br>(Frequent use<br>vs. No use)                                                      | 0.75<br>(0.59 to 0.96) |                                                                                                                                                                                                                                                                   |
|                    |                                                             |                  |                |                   |          |                       |                                                                                               | Carotenoids<br>supplements<br>(Frequent use<br>vs. No use)                                                    | 1.63<br>(1.06 to 2.50) |                                                                                                                                                                                                                                                                   |
|                    |                                                             |                  |                |                   |          |                       |                                                                                               |                                                                                                               |                        |                                                                                                                                                                                                                                                                   |
|                    |                                                             |                  |                |                   |          |                       |                                                                                               |                                                                                                               |                        |                                                                                                                                                                                                                                                                   |
|                    |                                                             |                  |                |                   |          |                       |                                                                                               |                                                                                                               |                        |                                                                                                                                                                                                                                                                   |
|                    |                                                             |                  |                |                   |          |                       |                                                                                               |                                                                                                               |                        |                                                                                                                                                                                                                                                                   |

|       |                            |           |            |                   |          |     |                 | beta-Carotene supplements<br>(Frequent use vs. No use) |                                  | 1.18<br>(0.71 to 1.97) |                                                           |
|-------|----------------------------|-----------|------------|-------------------|----------|-----|-----------------|--------------------------------------------------------|----------------------------------|------------------------|-----------------------------------------------------------|
|       |                            |           |            |                   |          |     |                 | Lycopene supplements<br>(Frequent use vs. No use)      |                                  | 1.38<br>(0.41 to 4.61) |                                                           |
|       |                            |           |            |                   |          |     |                 | Selenium supplements<br>(Frequent use vs. No use)      |                                  | 0.80<br>(0.45 to 1.41) |                                                           |
| Study | Project (follow-up period) | Countries | Diagnostic | Menopausal status | BC stage | Age | Sample size (n) | Exposures                                              | Outcomes                         | HR/RR<br>(95% CIs)     | Covariates                                                |
|       |                            |           |            |                   |          |     |                 | vs. No use)                                            |                                  |                        |                                                           |
|       |                            |           |            |                   |          |     |                 | Zinc supplements<br>(Frequent use vs. No use)          |                                  | 0.75<br>(0.46 to 1.21) |                                                           |
|       |                            |           |            |                   |          |     |                 | Multivitamins supplements<br>(Frequent use vs. No use) |                                  | 0.79<br>(0.56 to 1.12) |                                                           |
|       |                            |           |            |                   |          |     |                 | Vitamin C supplements<br>(Frequent use vs. No use)     |                                  | 0.82<br>(0.58 to 1.16) | daily servings of fruits and vegetable, comorbidity score |
|       |                            |           |            |                   |          |     |                 | Vitamin E supplements<br>(Frequent use vs. No use)     | Breast cancer-specific mortality | 0.85<br>(0.61 to 1.18) |                                                           |
|       |                            |           |            |                   |          |     |                 | Carotenoids supplements<br>(Frequent use vs. No use)   |                                  | 1.93<br>(1.14 to 3.28) |                                                           |

|       |                            |           |            |                   |          |     |                 | beta-Carotene supplements<br>(Frequent use vs. No use) |                          | 1.33<br>(0.69 to 2.55) |            |
|-------|----------------------------|-----------|------------|-------------------|----------|-----|-----------------|--------------------------------------------------------|--------------------------|------------------------|------------|
|       |                            |           |            |                   |          |     |                 | Lycopene supplements<br>(Frequent use vs. No use)      |                          | 2.09<br>(0.59 to 7.43) |            |
|       |                            |           |            |                   |          |     |                 | Selenium supplements<br>(Frequent use vs. No use)      |                          | 0.90<br>(0.45 to 1.79) |            |
|       |                            |           |            |                   |          |     |                 | Zinc supplements<br>(Frequent use vs. No use)          |                          | 0.82<br>(0.44 to 1.53) |            |
|       |                            |           |            |                   |          |     |                 | Multivitamins supplements<br>(Frequent use vs. No use) | Breast cancer recurrence | 0.82<br>(0.63 to 1.06) |            |
| Study | Project (follow-up period) | Countries | Diagnostic | Menopausal status | BC stage | Age | Sample size (n) | Exposures                                              | Outcomes                 | HR/RR (95% CIs)        | Covariates |
|       |                            |           |            |                   |          |     |                 | Vitamin C supplements<br>(Frequent use vs. No use)     |                          | 0.71<br>(0.54 to 0.92) |            |
|       |                            |           |            |                   |          |     |                 | Vitamin E supplements<br>(Frequent use vs. No use)     |                          | 0.70<br>(0.54 to 0.90) |            |
|       |                            |           |            |                   |          |     |                 | Carotenoids supplements<br>(Frequent use vs. No use)   |                          | 1.23<br>(0.76 to 1.96) |            |
|       |                            |           |            |                   |          |     |                 | beta-Carotene supplements                              |                          | 0.89<br>(0.50 to 1.60) |            |

|                      |                                                        |           |               |                                        |                |                       |                                                                         | (Frequent use<br>vs. No use)                            |                     |                                     |                                                                                                                                |
|----------------------|--------------------------------------------------------|-----------|---------------|----------------------------------------|----------------|-----------------------|-------------------------------------------------------------------------|---------------------------------------------------------|---------------------|-------------------------------------|--------------------------------------------------------------------------------------------------------------------------------|
|                      |                                                        |           |               |                                        |                |                       |                                                                         | Lycopene<br>supplements<br>(Frequent use<br>vs. No use) |                     |                                     | 1.17<br>(0.35 to 3.89)                                                                                                         |
|                      |                                                        |           |               |                                        |                |                       |                                                                         | Selenium<br>supplements<br>(Frequent use<br>vs. No use) |                     |                                     | 0.89<br>(0.53 to 1.49)                                                                                                         |
|                      |                                                        |           |               |                                        |                |                       |                                                                         | Zinc<br>supplements<br>(Frequent use<br>vs. No use)     |                     |                                     | 0.79<br>(0.49 to 1.28)                                                                                                         |
|                      |                                                        |           |               |                                        |                |                       |                                                                         |                                                         |                     |                                     |                                                                                                                                |
| 2012 Harris<br>HR(a) | Swedish mammography<br>cohort (SMC; mean 8.8<br>years) | Sweden    | Prediagnostic | Premenopausal<br>1 +<br>Postmenopausal | Invasive<br>BC | Mean<br>65.5<br>years | 3,234<br>(total<br>death<br>=973; BC-<br>specific<br>mortality<br>=394) | Coffee<br>(>4 cups/day vs.<br><1 cup/day)               | All-cause mortality | 1.12<br>(0.84 to 1.51)              | Age, energy<br>intake, education<br>level, marital<br>status,<br>menopausal<br>status at<br>diagnosis, BMI,<br>alcohol intake, |
|                      |                                                        |           |               |                                        |                |                       |                                                                         | Tea (>2 cups/day<br>vs. 0 cup/day)                      |                     | 0.94<br>(0.72 to 1.23)              |                                                                                                                                |
|                      |                                                        |           |               |                                        |                |                       |                                                                         | Coffee<br>(>4 cups/day vs.<br><1 cup/day)               |                     | Breast cancer-specific<br>mortality |                                                                                                                                |
|                      |                                                        |           |               |                                        |                |                       |                                                                         | Tea (>2 cups/day<br>vs. 0 cup/day)                      |                     | 1.02<br>(0.67 to 1.55)              |                                                                                                                                |
| Study                | Project (follow-up period)                             | Countries | Diagnostic    | Menopausal<br>status                   | BC stage       | Age                   | Sample<br>size (n)                                                      | Exposures                                               | Outcomes            | HR/RR<br>(95% CIs)                  | Covariates                                                                                                                     |
|                      |                                                        |           |               |                                        |                |                       |                                                                         |                                                         |                     |                                     | calendar year of<br>diagnosis, disease<br>stage, grade,<br>radiation<br>treatment,<br>chemotherapy,<br>hormonal<br>treatment   |

| 2012 Harris<br>HR(b) | Swedish mammography<br>cohort (SMC; mean 8.2<br>years) | Sweden    | Prediagnostic | Premenopausal<br>l +<br>Postmenopausal | Invasive<br>BC | mean<br>64.3<br>years | 3,146<br>(Total<br>death<br>=860; BC-<br>specific<br>death<br>=385) | Alcohol intake<br>(>10 g/day vs.<br>Non-drinker)  | All-cause mortality                 | 1.03<br>(0.71 to 1.51) | Age, energy<br>intake, education<br>level, marital<br>status,<br>menopausal<br>status at<br>diagnosis, BMI,<br>calendar year of<br>diagnosis, disease<br>stage, grade,<br>radiation<br>treatment,<br>chemotherapy<br>and/or hormonal<br>treatment |
|----------------------|--------------------------------------------------------|-----------|---------------|----------------------------------------|----------------|-----------------------|---------------------------------------------------------------------|---------------------------------------------------|-------------------------------------|------------------------|---------------------------------------------------------------------------------------------------------------------------------------------------------------------------------------------------------------------------------------------------|
|                      |                                                        |           |               |                                        |                |                       |                                                                     | Alcohol intake<br>(>10 g/day vs.<br>Non-drinker)  | Breast cancer-specific<br>mortality | 1.36<br>(0.82 to 2.26) |                                                                                                                                                                                                                                                   |
| 2012 Harris<br>HR(c) | Swedish mammography<br>cohort                          | Sweden    | Prediagnostic | Premenopausal<br>l +<br>Postmenopausal | Invasive<br>BC | Mean<br>65.1<br>years | 3,116<br>(Total<br>death<br>=852;                                   | Folate intake<br>(>246 µg/day vs.<br><190 µg/day) | All-cause mortality                 | 0.78<br>(0.65 to 0.94) | Age, energy<br>intake, education                                                                                                                                                                                                                  |
| Study                | Project (follow-up period)                             | Countries | Diagnostic    | Menopausal<br>status                   | BC stage       | Age                   | Sample<br>size (n)                                                  | Exposures                                         | Outcomes                            | HR/RR<br>(95% CIs)     | Covariates                                                                                                                                                                                                                                        |
|                      | (SMC; mean 8.3 years)                                  |           |               |                                        |                |                       | BC-<br>specific<br>death<br>=381)                                   | Folate intake<br>(>246 µg/day vs.<br><190 µg/day) | Breast cancer-specific<br>mortality | 0.78<br>(0.58 to 1.03) | level, marital<br>status,<br>menopausal<br>status at<br>diagnosis, BMI,<br>alcohol intake,<br>calendar year of<br>diagnosis, disease<br>stage, grade,<br>radiation<br>treatment,<br>chemotherapy,<br>hormonal<br>treatment                        |

| 2012 Nechuta SJ | After breast cancer pooling project (ABCP; mean 7.4 years)          | United States and China | Postdiagnostic | Premenopausal + Postmenopausal | I-III       | Mean 54.5 years | 9,514 (Total death =1,171; BC-specific death =881; BC recurrence =1,348) | Isoflavone (T3 vs. T1)                            | All-cause mortality              | 0.87 (0.70 to 1.10) | Age at diagnosis, ER/PR status, TNM stage, chemotherapy, radiotherapy, hormonal therapy, smoking, BMI, exercise, cruciferous vegetable intake,        |
|-----------------|---------------------------------------------------------------------|-------------------------|----------------|--------------------------------|-------------|-----------------|--------------------------------------------------------------------------|---------------------------------------------------|----------------------------------|---------------------|-------------------------------------------------------------------------------------------------------------------------------------------------------|
|                 |                                                                     |                         |                |                                |             |                 |                                                                          | Isoflavone (T3 vs. T1)                            | Breast cancer-specific mortality | 0.83 (0.64 to 1.07) |                                                                                                                                                       |
|                 |                                                                     |                         |                |                                |             |                 |                                                                          | Isoflavone (T3 vs. T1)                            | Breast cancer recurrence         | 0.75 (0.61 to 0.92) |                                                                                                                                                       |
| Study           | Project (follow-up period)                                          | Countries               | Diagnostic     | Menopausal status              | BC stage    | Age             | Sample size (n)                                                          | Exposures                                         | Outcomes                         | HR/RR (95% CIs)     | Covariates                                                                                                                                            |
|                 |                                                                     |                         |                |                                |             |                 |                                                                          |                                                   |                                  |                     | parity, menopausal status, study, race, education                                                                                                     |
| 2012 Vrieling A | Mamma carcinoma risk factor investigation (MARIE; median 5.5 years) | Germany                 | Prediagnostic  | Postmenopausal                 | I-III A     | Mean 62.7 years | 2,522 (Total death =316; BC-specific death =235; BC recurrence =247)     | Total alcohol intake (>12.0 g/day vs. <0.5 g/day) | All-cause mortality              | 1.28 (0.90 to 1.81) | Age at diagnosis, study center, tumor size, nodal status, metastases, tumor grade, ERPR status, radiotherapy, HRT use at diagnosis, mode of detection |
|                 |                                                                     |                         |                |                                |             |                 |                                                                          | Total alcohol intake (>12.0 g/day vs. <0.5 g/day) | Breast cancer-specific mortality | 1.74 (1.13 to 2.67) |                                                                                                                                                       |
|                 |                                                                     |                         |                |                                |             |                 |                                                                          | Total alcohol intake (>12.0 g/day vs. <0.5 g/day) | Breast cancer recurrence         | 1.08 (0.73 to 1.58) |                                                                                                                                                       |
| 2013 Conroy SM  | Multiethnic cohort (MEC; mean 6.2 years)                            | United States           | Prediagnostic  | Postmenopausal                 | Invasive BC | Mean 68.6 years | 3,842 (Total death =804; BC-specific                                     | Soy products (T3 vs. T1)                          | All-cause mortality              | 1.03 (0.81 to 1.33) | BMI, age at diagnosis, ethnicity, energy intake, stage, hormone receptor status, treatment,                                                           |
|                 |                                                                     |                         |                |                                |             |                 |                                                                          | Dietary isoflavones (T3 vs. T1)                   |                                  | 0.99 (0.82 to 1.20) |                                                                                                                                                       |
|                 |                                                                     |                         |                |                                |             |                 |                                                                          | Soy products                                      |                                  | 1.03                |                                                                                                                                                       |



|                |                                                          |           |               |                                          |                |                   | death<br>=376)                                                           | <u>(T3 vs. T1)</u><br>Dietary<br>isoflavones (T3<br>vs. T1) | Breast cancer-specific<br>mortality | <u>(0.71 to 1.50)</u><br>0.95<br>(0.71 to 1.28) | cardiovascular<br>comorbidity,<br>history of                                                                                                                                                                                                                   |
|----------------|----------------------------------------------------------|-----------|---------------|------------------------------------------|----------------|-------------------|--------------------------------------------------------------------------|-------------------------------------------------------------|-------------------------------------|-------------------------------------------------|----------------------------------------------------------------------------------------------------------------------------------------------------------------------------------------------------------------------------------------------------------------|
| Study          | Project (follow-up period)                               | Countries | Diagnostic    | Menopausal<br>status                     | BC stage       | Age               | Sample<br>size (n)                                                       | Exposures                                                   | Outcomes                            | HR/RR<br>(95% CIs)                              | Covariates                                                                                                                                                                                                                                                     |
|                |                                                          |           |               |                                          |                |                   |                                                                          |                                                             |                                     |                                                 | diabetes,<br>smoking status,<br>years between<br>cohort entry and<br>diagnosis                                                                                                                                                                                 |
|                |                                                          |           |               |                                          |                |                   |                                                                          | <u>Vitamin C<br/>(Q4 vs. Q1)</u>                            | All-cause mortality                 | 0.84<br>(0.71 to 1.00)                          | Age, energy<br>intake, education<br>level, marital<br>status,<br>menopausal<br>status at<br>diagnosis, BMI,<br>alcohol intake,<br>calendar year of<br>diagnosis, disease<br>stage, grade,<br>radiation<br>treatment,<br>chemotherapy,<br>hormonal<br>treatment |
| 2013 Harris HR | Swedish mammography<br>cohort (SMC; median 7.8<br>years) | Sweden    | Prediagnostic | Premenopausa<br>1+<br>Postmenopaus<br>al | Invasive<br>BC | Mean<br>65 years  | 3,405<br>(Total<br>death<br>=1,055;<br>BC-<br>specific<br>death<br>=416) | Vitamin C<br>(Q4 vs. Q1)                                    | Breast cancer-specific<br>mortality | 0.75<br>(0.57 to 0.99)                          |                                                                                                                                                                                                                                                                |
| 2013 Holm M    | Danish cohort ‘diet, cancer<br>and health’ (DCH;         | Denmark   | Prediagnostic | Premenopausa<br>1+<br>Postmenopaus<br>al | I-III          | 50 to 64<br>years | 1,052<br>(BC-<br>specific<br>death<br>=106; BC                           | Alcohol<br>(>2 units/day vs.<br><1 unit/day)                | Breast cancer-specific<br>mortality | 1.10<br>(0.67 to 1.82)                          | Tumor size,<br>lymph node<br>status, receptor<br>status                                                                                                                                                                                                        |
| Study          | Project (follow-up period)                               | Countries | Diagnostic    | Menopausal<br>status                     | BC stage       | Age               | Sample<br>size (n)                                                       | Exposures                                                   | Outcomes                            | HR/RR<br>(95% CIs)                              | Covariates                                                                                                                                                                                                                                                     |

|                   | median 6.3 years for mortality and median 6 years for recurrence) |               |                                |                                |             |                 | recurrence =110)                                    | Alcohol (>2 units/day vs. <1 unit/day)               | Breast cancer recurrence         | 1.65 (1.02 to 2.67) | and grade, BMI, smoking, menopausal status, HRT use, education level, physical activity, total folate intake                                                                                                   |
|-------------------|-------------------------------------------------------------------|---------------|--------------------------------|--------------------------------|-------------|-----------------|-----------------------------------------------------|------------------------------------------------------|----------------------------------|---------------------|----------------------------------------------------------------------------------------------------------------------------------------------------------------------------------------------------------------|
|                   |                                                                   |               |                                |                                |             |                 |                                                     | WCRF/AICR recommendation adherence score (Q4 vs. Q1) | All-cause mortality              | 0.61 (0.39 to 0.96) | Age, total number of comorbid conditions, current smoking, cancer stage, cancer type, cancer treatment, subsequent cancer diagnosis before 2004, current cancer treatment, person-years since cancer diagnosis |
| 2013 Inoue-Choi M | Iowa women's health study (IWHs; mean 8.6 years)                  | United States | Prediagnostic + Postdiagnostic | Postmenopausal                 | Invasive BC | Mean 78.9 years | 938 (Total death =203; BC-specific death =75)       | WCRF/AICR recommendation adherence score (Q4 vs. Q1) | Breast cancer-specific mortality | 0.88 (0.41 to 1.91) |                                                                                                                                                                                                                |
| Study             | Project (follow-up period)                                        | Countries     | Diagnostic                     | Menopausal status              | BC stage    | Age             | Sample size (n)                                     | Exposures                                            | Outcomes                         | HR/RR (95% CIs)     | Covariates                                                                                                                                                                                                     |
|                   |                                                                   |               |                                |                                |             |                 | 4,103 (Total death =981; BC-specific death =453; BC | DASH (Q5 vs. Q1)                                     |                                  | 0.85 (0.61 to 1.19) | Time since diagnosis, age at diagnosis, energy intake, BMI, BMI change, age at first birth and parity, oral contraceptive                                                                                      |
| 2013 Izano MA     | Nurses' health study (NHS; median 9.3 years)                      | United States | Prediagnostic + Postdiagnostic | Premenopausal + Postmenopausal | I-III       | Mean 60.4 years |                                                     | AHEI-2010 (Q5 vs. Q1)                                | Breast cancer-specific mortality | 1.07 (0.77 to 1.49) |                                                                                                                                                                                                                |

|                 |                                                          |               |                                |                                |          |                 | recurrence=38)                                                 |                                                              |                                  |                     | use, menopausal status, HRT use, smoking, stage of disease, radiation treatment, chemotherapy, hormonal treatment, physical activity         |
|-----------------|----------------------------------------------------------|---------------|--------------------------------|--------------------------------|----------|-----------------|----------------------------------------------------------------|--------------------------------------------------------------|----------------------------------|---------------------|----------------------------------------------------------------------------------------------------------------------------------------------|
| 2013 Kroenke CH | Life after cancer epidemiology (LACE; median 11.8 years) | United States | Prediagnostic + Postdiagnostic | Premenopausal + Postmenopausal | I-III A  | Mean 58.6 years | 1,893 (Total death =372; BC-specific death =189; BC recurrence | Total dairy intake (>2.0 servings/day vs. 0-1.0 serving/day) | All-cause mortality              | 1.39 (1.02 to 1.90) | Age at diagnosis, time between diagnosis and dietary assessment, age, race, education                                                        |
| Study           | Project (follow-up period)                               | Countries     | Diagnostic                     | Menopausal status              | BC stage | Age             | Sample size (n)                                                | Exposures                                                    | Outcomes                         | HR/RR (95% CIs)     | Covariates                                                                                                                                   |
|                 |                                                          |               |                                |                                |          |                 |                                                                | Total dairy intake (>2.0 servings/day vs. 0-1.0 serving/day) | Breast cancer-specific mortality | 1.26 (0.81 to 1.95) | , cancer stage at diagnosis, tumor size, human epidermal growth receptor 2                                                                   |
|                 |                                                          |               |                                |                                |          |                 | =349)                                                          | Total dairy intake (>2.0 servings/day vs. 0-1.0 serving/day) | Breast cancer recurrence         | 1.13 (0.83 to 1.54) | neu status, nodal status, estrogen receptor status, chemotherapy, radiation, tamoxifen, comorbidity, menopausal status, smoking status, BMI, |

|                                                                            |                                                                 |               |                |                                |          |                 |                                                        |                                                                                                              |                     |                                             |                                                                                                                                                     |                                                                                                                                                                               |
|----------------------------------------------------------------------------|-----------------------------------------------------------------|---------------|----------------|--------------------------------|----------|-----------------|--------------------------------------------------------|--------------------------------------------------------------------------------------------------------------|---------------------|---------------------------------------------|-----------------------------------------------------------------------------------------------------------------------------------------------------|-------------------------------------------------------------------------------------------------------------------------------------------------------------------------------|
| energy intake, alcohol intake, red meat intake, fiber intake, fruit intake |                                                                 |               |                |                                |          |                 |                                                        |                                                                                                              |                     |                                             |                                                                                                                                                     |                                                                                                                                                                               |
| 2013 Kwan ML                                                               | After breast cancer                                             | United States | Postdiagnostic | Premenopausal + Postmenopausal | I-III    | Mean 58.8 years | 9,325 (Total death                                     | Alcohol intake (Regular high vs. Non-drinker)                                                                | All-cause mortality | 0.79 (0.63 to 1.00)                         | Age at diagnosis, AJCC                                                                                                                              |                                                                                                                                                                               |
| Study                                                                      | Project (follow-up period)                                      | Countries     | Diagnostic     | Menopausal status              | BC stage | Age             | Sample size (n)                                        | Exposures                                                                                                    | Outcomes            | HR/RR (95% CIs)                             | Covariates                                                                                                                                          |                                                                                                                                                                               |
| pooling project (ABCPP; mean 10.3 years)                                   |                                                                 |               |                |                                |          |                 | =1,542)                                                | Breast cancer-specific mortality                                                                             |                     |                                             | 0.80 (0.59 to 1.09)                                                                                                                                 | stage, race/ethnicity, education, menopausal status around diagnosis, hormone receptor status, surgery, treatment, smoking, physical activity, pre-diagnosis BMI, comorbidity |
|                                                                            |                                                                 |               |                |                                |          |                 | 9,306 (BC-specific death =911)                         |                                                                                                              |                     |                                             |                                                                                                                                                     |                                                                                                                                                                               |
|                                                                            |                                                                 |               |                |                                |          |                 | 9,151 (BC recurrence =1,487)                           |                                                                                                              |                     |                                             |                                                                                                                                                     |                                                                                                                                                                               |
| 2013 Newcomb PA                                                            | Collaborative women's longevity study (CWLS; median 11.3 years) | United States | Prediagnostic  | Premenopausal + Postmenopausal | -        | 20 to 79 years  | 22,890 (Total death =7,780; BC-specific death =19,220) | Alcohol consumption (>10 drinks/week vs. 0 drink/week)<br>Wine consumption (>7 drinks/week vs. 0 drink/week) | All-cause mortality | 0.96 (0.88 to 1.05)<br>0.97<br>0.85 to 1.09 | Age at diagnosis, stage of disease at diagnosis, state of residence at diagnosis, study phase, family history of breast cancer, age at first birth, |                                                                                                                                                                               |

|       |                            |           |            |                   |          |     |                     | Beer consumption (>7 drinks/week vs. 0 drink/week)     |                                  | 1.13 (1.01 to 1.26) | menopausal status,                                               |
|-------|----------------------------|-----------|------------|-------------------|----------|-----|---------------------|--------------------------------------------------------|----------------------------------|---------------------|------------------------------------------------------------------|
|       |                            |           |            |                   |          |     |                     | Spirits consumption (>7 drinks/week vs. 0 drink/week)  |                                  | 1.05 (0.95 to 1.15) |                                                                  |
| Study | Project (follow-up period) | Countries | Diagnostic | Menopausal status | BC stage | Age | Sample size (n)     | Exposures                                              | Outcomes                         | HR/RR (95% CIs)     | Covariates                                                       |
|       |                            |           |            |                   |          |     |                     | Alcohol consumption (>10 drinks/week vs. 0 drink/week) |                                  | 0.89 (0.77 to 1.04) |                                                                  |
|       |                            |           |            |                   |          |     |                     | Wine consumption (>7 drinks/week vs. 0 drink/week)     |                                  | 1.11 (0.93 to 1.34) |                                                                  |
|       |                            |           |            |                   |          |     |                     | Beer consumption (>7 drinks/week vs. 0 drink/week)     | Breast cancer-specific mortality | 0.96 (0.81 to 1.14) | hormone therapy use, BMI, smoking status, education, mammography |
|       |                            |           |            |                   |          |     |                     | Spirits consumption (>7 drinks/week vs. 0 drink/week)  |                                  | 0.86 (0.73 to 1.02) |                                                                  |
|       |                            |           |            |                   |          |     | 4,881 (Total death) | Alcohol consumption (>10                               | All-cause mortality              | 0.64 (0.47 to 0.88) |                                                                  |

|       |                            |           |            |                      |          |     |                    | =1,069;<br>BC-specific<br>death<br>=276)                           | drinks/week vs.<br>0 drink/week)    |                        |            |
|-------|----------------------------|-----------|------------|----------------------|----------|-----|--------------------|--------------------------------------------------------------------|-------------------------------------|------------------------|------------|
|       |                            |           |            |                      |          |     |                    | Wine<br>consumption<br>(>7 drinks/week<br>vs. 0<br>drink/week)     |                                     | 0.73<br>(0.51 to 1.05) |            |
|       |                            |           |            |                      |          |     |                    | Beer<br>consumption<br>(>7 drinks/week<br>vs. 0<br>drink/week)     |                                     | 0.91<br>(0.53 to 1.57) |            |
|       |                            |           |            |                      |          |     |                    | Spirits<br>consumption<br>(>7 drinks/week<br>vs. 0<br>drink/week)  |                                     | 0.69<br>(0.49 to 0.98) |            |
|       |                            |           |            |                      |          |     |                    | Alcohol<br>consumption<br>(>10<br>drinks/week vs.<br>0 drink/week) | Breast cancer-specific<br>mortality | 0.83<br>(0.45 to 1.54) |            |
|       |                            |           |            |                      |          |     |                    | Wine<br>consumption<br>(>7 drinks/week<br>vs. 0<br>drink/week)     |                                     | 1.45<br>(0.77 to 2.73) |            |
| Study | Project (follow-up period) | Countries | Diagnostic | Menopausal<br>status | BC stage | Age | Sample<br>size (n) | Exposures                                                          | Outcomes                            | HR/RR<br>(95% CIs)     | Covariates |
|       |                            |           |            |                      |          |     |                    | Beer<br>consumption<br>(>7 drinks/week<br>vs. 0<br>drink/week)     |                                     | 0.94<br>(0.37 to 2.39) |            |

|  |  |  |  |  |                                                       |  |                        |  |  |
|--|--|--|--|--|-------------------------------------------------------|--|------------------------|--|--|
|  |  |  |  |  | Spirits consumption (>7 drinks/week vs. 0 drink/week) |  | 0.83<br>(0.43 to 1.62) |  |  |
|  |  |  |  |  | Multivitamin supplements (Yes vs. No)                 |  | 0.94<br>(0.83 to 1.07) |  |  |
|  |  |  |  |  | Vitamin A supplements (Yes vs. No)                    |  | 1.06<br>(0.82 to 1.36) |  |  |
|  |  |  |  |  | Vitamin B supplements (Yes vs. No)                    |  | 0.96<br>(0.81 to 1.15) |  |  |
|  |  |  |  |  | Vitamin C supplements (Yes vs. No)                    |  | 0.87<br>(0.76 to 1.01) |  |  |
|  |  |  |  |  | Vitamin D supplements (Yes vs. No)                    |  | 0.95<br>(0.72 to 1.24) |  |  |
|  |  |  |  |  | Vitamin E supplements (Yes vs. No)                    |  | 0.92<br>(0.79 to 1.07) |  |  |
|  |  |  |  |  | Antioxidants supplements (Yes vs. No)                 |  | 0.84<br>(0.72 to 0.99) |  |  |
|  |  |  |  |  | Multivitamin supplements (Yes vs. No)                 |  | 0.95<br>(0.82 to 1.11) |  |  |
|  |  |  |  |  | Vitamin A supplements (Yes vs. No)                    |  | 0.95<br>(0.68 to 1.34) |  |  |
|  |  |  |  |  | Vitamin B supplements (Yes vs. No)                    |  | 0.98<br>(0.80 to 1.21) |  |  |

|       |                            |           |            |                   |          |     |                                     | Vitamin C supplements                    |                          | 0.94<br>(0.79 to 1.12) |            |
|-------|----------------------------|-----------|------------|-------------------|----------|-----|-------------------------------------|------------------------------------------|--------------------------|------------------------|------------|
| Study | Project (follow-up period) | Countries | Diagnostic | Menopausal status | BC stage | Age | Sample size (n)                     | Exposures                                | Outcomes                 | HR/RR<br>(95% CIs)     | Covariates |
|       |                            |           |            |                   |          |     |                                     | (Yes vs. No)                             |                          |                        |            |
|       |                            |           |            |                   |          |     |                                     | Vitamin D supplements<br>(Yes vs. No)    |                          | 0.97<br>(0.68 to 1.38) |            |
|       |                            |           |            |                   |          |     |                                     | Vitamin E supplements<br>(Yes vs. No)    |                          | 0.89<br>(0.72 to 1.10) |            |
|       |                            |           |            |                   |          |     |                                     | Antioxidants supplements<br>(Yes vs. No) |                          | 0.88<br>(0.74 to 1.03) |            |
|       |                            |           |            |                   |          |     |                                     | Multivitamin supplements<br>(Yes vs. No) |                          | 0.97<br>(0.86 to 1.09) |            |
|       |                            |           |            |                   |          |     |                                     | Vitamin A supplements<br>(Yes vs. No)    |                          | 1.16<br>(0.80 to 1.70) |            |
|       |                            |           |            |                   |          |     |                                     | Vitamin B supplements<br>(Yes vs. No)    |                          | 0.94<br>(0.79 to 1.11) |            |
|       |                            |           |            |                   |          |     | 11,672<br>(BC recurrence<br>=1,325) | Vitamin C supplements<br>(Yes vs. No)    | Breast cancer recurrence | 0.98<br>(0.85 to 1.12) |            |
|       |                            |           |            |                   |          |     |                                     | Vitamin D supplements<br>(Yes vs. No)    |                          | 0.92<br>(0.62 to 1.35) |            |
|       |                            |           |            |                   |          |     |                                     | Vitamin E supplements<br>(Yes vs. No)    |                          | 0.90<br>(0.78 to 1.03) |            |
|       |                            |           |            |                   |          |     |                                     | Antioxidants supplements<br>(Yes vs. No) |                          | 0.94<br>(0.83 to 1.07) |            |



| 2013 Vrieling A | Mamma carcinoma risk factor investigation (MARIE; median 5.5 years)     | Germany       | Prediagnostic                  | Postmenopausal    | Invasive BC | 50 to 74 years  | 2,184 (Total death =316; BC-specific death =235; BC | Healthy dietary pattern (Q4 vs. Q1)   | All-cause mortality              | 0.87 (0.61 to 1.23) | Age at diagnosis, study center, tumor size, nodal status, metastas                                                                                                                  |
|-----------------|-------------------------------------------------------------------------|---------------|--------------------------------|-------------------|-------------|-----------------|-----------------------------------------------------|---------------------------------------|----------------------------------|---------------------|-------------------------------------------------------------------------------------------------------------------------------------------------------------------------------------|
| Study           | Project (follow-up period)                                              | Countries     | Diagnostic                     | Menopausal status | BC stage    | Age             | Sample size (n)                                     | Exposures                             | Outcomes                         | HR/RR (95% CIs)     | Covariates                                                                                                                                                                          |
|                 |                                                                         |               |                                |                   |             |                 |                                                     | Unhealthy dietary pattern (Q4 vs. Q1) |                                  | 1.34 (0.93 to 1.94) |                                                                                                                                                                                     |
|                 |                                                                         |               |                                |                   |             |                 |                                                     | Healthy dietary pattern (Q4 vs. Q1)   | Breast cancer-specific mortality | 0.89 (0.59 to 1.35) | es, tumour grade, ERPR status, radiotherapy, HRT use at diagnosis, mode of detection, total energy intake                                                                           |
|                 |                                                                         |               |                                |                   |             |                 | recurrence=247)                                     | Unhealthy dietary pattern (Q4 vs. Q1) |                                  | 0.99 (0.64 to 1.52) |                                                                                                                                                                                     |
|                 |                                                                         |               |                                |                   |             |                 |                                                     | Healthy dietary pattern (Q4 vs. Q1)   | Breast cancer recurrence         | 0.71 (0.46 to 1.06) |                                                                                                                                                                                     |
|                 |                                                                         |               |                                |                   |             |                 |                                                     | Unhealthy dietary pattern (Q4 vs. Q1) |                                  | 0.91 (0.61 to 1.36) |                                                                                                                                                                                     |
| 2014 Geroje SM  | Women's health initiative (WHI-observational studies; median 9.6 years) | United States | Prediagnostic + Postdiagnostic | Postmenopausal    | Invasive BC | Mean 63.6 years | 2,317 (Total death =415; BC-specific death =188)    | HEI-2005 (Q4 vs. Q1)                  | All-cause mortality              | 0.74 (0.55 to 0.99) | Age, WHI component, ethnicity, income, education, stage, ER status, PR status, time since diagnosis, energy intake in kcals, physical activity, serving of alcohol per week, use of |
|                 |                                                                         |               |                                |                   |             |                 |                                                     | HEI-2005 (Q4 vs. Q1)                  | Breast cancer-specific mortality | 0.91 (0.60 to 1.40) |                                                                                                                                                                                     |

|             |                                                                 |           |                |                                |                    |                 |                                                                   |                                                              |                                                |                        | postmenopausal hormone therapy                                                                                                                                                                           |
|-------------|-----------------------------------------------------------------|-----------|----------------|--------------------------------|--------------------|-----------------|-------------------------------------------------------------------|--------------------------------------------------------------|------------------------------------------------|------------------------|----------------------------------------------------------------------------------------------------------------------------------------------------------------------------------------------------------|
| Study       | Project (follow-up period)                                      | Countries | Diagnostic     | Menopausal status              | BC stage           | Age             | Sample size (n)                                                   | Exposures                                                    | Outcomes                                       | HR/RR (95% CIs)        | Covariates                                                                                                                                                                                               |
| 2015 Bao PP | Shanghai breast cancer survival study (SBCSS; median 9.1 years) | China     | Postdiagnostic | Premenopausal + Postmenopausal | Triple-negative BC | Mean 53.4 years | 518 (Total death =128; BC-specific death =235; BC recurrence=247) | Tea consumption (first 6 months post-diagnosis; Yes vs. No)  | All-cause mortality                            | 0.58<br>(0.29 to 1.16) | Age at diagnosis, education, marital status, Chalon comorbidity index, menopausal status, BMI at baseline, exercise participation at baseline, soy protein intake, chemotherapy, radiotherapy, TNM stage |
|             |                                                                 |           |                |                                |                    |                 |                                                                   | Tea consumption (first 18 months post-diagnosis; Yes vs. No) |                                                | 0.76<br>(0.47 to 1.21) |                                                                                                                                                                                                          |
|             |                                                                 |           |                |                                |                    |                 |                                                                   | Tea consumption (first 36 months post-diagnosis; Yes vs. No) |                                                | 0.47<br>(0.29 to 0.79) |                                                                                                                                                                                                          |
|             |                                                                 |           |                |                                |                    |                 |                                                                   | Tea consumption (first 60 months post-diagnosis; Yes vs. No) |                                                | 0.57<br>(0.34 to 0.93) |                                                                                                                                                                                                          |
|             |                                                                 |           |                |                                |                    |                 |                                                                   | Tea consumption (first 6 months post-diagnosis; Yes vs. No)  | Breast cancer-specific mortality or recurrence | 0.60<br>(0.29 to 1.27) |                                                                                                                                                                                                          |
|             |                                                                 |           |                |                                |                    |                 |                                                                   | Tea consumption (first 18 months post-diagnosis; Yes vs. No) |                                                | 0.58<br>(0.33 to 1.02) |                                                                                                                                                                                                          |

|                 |                                                                                       |           |               |                   |                           |                                              |                             | Tea consumption (first 36 months post-diagnosis; Yes vs. No) | 0.46<br>(0.26 to 0.83)           |                        |                                                                                                                                                                    |
|-----------------|---------------------------------------------------------------------------------------|-----------|---------------|-------------------|---------------------------|----------------------------------------------|-----------------------------|--------------------------------------------------------------|----------------------------------|------------------------|--------------------------------------------------------------------------------------------------------------------------------------------------------------------|
|                 |                                                                                       |           |               |                   |                           |                                              |                             | Tea consumption (first 60 months post-diagnosis; Yes vs. No) | 0.54<br>(0.31 to 0.96)           |                        |                                                                                                                                                                    |
| 2015 Jeffreys M | UK Clinical practice research datalink (CPRD; median 2.5                              | UK        | Prediagnostic | Postmenopausal    | -                         | -                                            | 11,112 (Total death =2,103) | Vitamin D supplements (Any prescription vs. None)            | All-cause mortality              | 0.78<br>(0.70 to 0.88) | Age, period, smoking, alcohol, BMI, area-level deprivation                                                                                                         |
| Study           | Project (follow-up period)                                                            | Countries | Diagnostic    | Menopausal status | BC stage                  | Age                                          | Sample size (n)             | Exposures                                                    | Outcomes                         | HR/RR (95% CIs)        | Covariates                                                                                                                                                         |
| years)          |                                                                                       |           |               |                   |                           |                                              |                             |                                                              |                                  |                        |                                                                                                                                                                    |
|                 |                                                                                       |           |               |                   |                           |                                              |                             | Flavonoids                                                   | All-cause mortality              | 0.94<br>(0.80 to 1.10) | Age, country, alcohol, BMI, HRT use, schooling, smoking, physical activity, intake of other polyphenol classes, ER receptor status, cancer stage, grading of tumor |
|                 |                                                                                       |           |               |                   |                           |                                              |                             | Phenolic acids                                               |                                  | 1.04<br>(0.90 to 1.20) |                                                                                                                                                                    |
|                 |                                                                                       |           |               |                   |                           |                                              |                             | Stilbenes                                                    |                                  | 0.99<br>(0.92 to 1.06) |                                                                                                                                                                    |
|                 |                                                                                       |           |               |                   |                           |                                              |                             | Lignans                                                      |                                  | 1.26<br>(1.05 to 1.51) |                                                                                                                                                                    |
| 2015 Kyro C     | European prospective investigation into cancer and nutrition (EPIC; median 6.3 years) | Europe    | Prediagnostic | Premenopausal     | In situ and metastatic BC | Median=295; BC=59 years specific death =186) | 2,804 (Total death =186)    | Flavonoids                                                   | Breast cancer-specific mortality | 1.02<br>(0.83 to 1.26) |                                                                                                                                                                    |
|                 |                                                                                       |           |               |                   |                           |                                              |                             | Phenolic acids                                               |                                  | 1.00<br>(0.83 to 1.21) |                                                                                                                                                                    |
|                 |                                                                                       |           |               |                   |                           |                                              |                             | Stilbenes                                                    |                                  | 0.99<br>(0.91 to 1.08) |                                                                                                                                                                    |
|                 |                                                                                       |           |               |                   |                           |                                              |                             | Lignans                                                      |                                  | 1.24<br>(0.98 to 1.58) |                                                                                                                                                                    |
|                 |                                                                                       |           |               |                   |                           |                                              |                             | Flavonoids                                                   |                                  | 1.02                   |                                                                                                                                                                    |
|                 |                                                                                       |           |               |                   |                           |                                              |                             | Flavonoids                                                   | All-cause mortality              | 1.02                   |                                                                                                                                                                    |

|               |                                                   |               |               |                   |          |                 |                           |                                              |                     | (0.95 to 1.10)      |                                                                                                                             |  |  |
|---------------|---------------------------------------------------|---------------|---------------|-------------------|----------|-----------------|---------------------------|----------------------------------------------|---------------------|---------------------|-----------------------------------------------------------------------------------------------------------------------------|--|--|
|               |                                                   |               |               |                   |          |                 |                           | Phenolic acids                               |                     | 0.97                |                                                                                                                             |  |  |
|               |                                                   |               |               |                   |          |                 |                           |                                              |                     | (0.91 to 1.05)      |                                                                                                                             |  |  |
|               |                                                   |               |               |                   |          |                 |                           | 8,978                                        | Stilbenes           | 0.97                |                                                                                                                             |  |  |
|               |                                                   |               |               |                   |          |                 |                           | (Total                                       |                     | (0.95 to 1.00)      |                                                                                                                             |  |  |
|               |                                                   |               |               |                   |          |                 |                           | death                                        | Lignans             | 0.94                |                                                                                                                             |  |  |
|               |                                                   |               |               |                   |          |                 |                           | =1,187;                                      |                     | (0.86 to 1.04)      |                                                                                                                             |  |  |
|               |                                                   |               |               |                   |          |                 |                           | BC-                                          | Flavonoids          | 1.04                |                                                                                                                             |  |  |
|               |                                                   |               |               |                   |          |                 |                           | specific                                     |                     | (0.93 to 1.15)      |                                                                                                                             |  |  |
|               |                                                   |               |               |                   |          |                 |                           | death                                        | Phenolic acids      | 0.99                |                                                                                                                             |  |  |
|               |                                                   |               |               |                   |          |                 |                           | =567)                                        |                     | (0.89 to 1.10)      |                                                                                                                             |  |  |
|               |                                                   |               |               |                   |          |                 |                           | Breast cancer-specific mortality             |                     | 0.97                |                                                                                                                             |  |  |
|               |                                                   |               |               |                   |          |                 |                           |                                              |                     | (0.94 to 1.00)      |                                                                                                                             |  |  |
|               |                                                   |               |               |                   |          |                 |                           |                                              |                     | 0.83                |                                                                                                                             |  |  |
|               |                                                   |               |               |                   |          |                 |                           |                                              |                     | Lignans             | (0.72 to 0.96)                                                                                                              |  |  |
|               |                                                   |               |               |                   |          |                 |                           | 4,452                                        |                     |                     |                                                                                                                             |  |  |
|               |                                                   |               |               |                   |          |                 |                           | (Total                                       |                     |                     |                                                                                                                             |  |  |
| 2016          | ACS's cancer prevention study-II nutrition cohort | United States | Prediagnostic | -                 | -        | Mean 70.7 years | death                     | ACS guidelines                               | All-cause mortality | 1.01                | Age at diagnosis, diagnosis year, tumor stage at diagnosis,                                                                 |  |  |
| McCullough ML |                                                   |               |               |                   |          |                 | =1,204; BC-specific death | diet score (3-5 vs. 0-2)                     |                     |                     |                                                                                                                             |  |  |
|               |                                                   |               |               |                   |          |                 |                           |                                              |                     |                     | (0.88 to 1.17)                                                                                                              |  |  |
| Study         | Project (follow-up period)                        | Countries     | Diagnostic    | Menopausal status | BC stage | Age             | Sample size (n)           | Exposures                                    | Outcomes            | HR/RR (95% CIs)     | Covariates                                                                                                                  |  |  |
|               |                                                   |               |               |                   |          |                 |                           | ACS guidelines diet score (6-9 vs. 0-2)      |                     | 1.00 (0.84 to 1.18) | Tumor grade at diagnosis, ER status, PR status, surgery, chemotherapy, radiation, hormone therapy, aromatase inhibitor uses |  |  |
|               |                                                   |               |               |                   |          |                 |                           | =398) Fruit and vegetable intake (Q3 vs. Q1) |                     | 1.06 (0.85 to 1.33) |                                                                                                                             |  |  |
|               |                                                   |               |               |                   |          |                 |                           | Total grain intake (Q3 vs. Q1)               |                     | 1.08 (0.91 to 1.29) |                                                                                                                             |  |  |

|       |                            |           |                |                      |          |     |                                                                     | Red and<br>processed meat<br>intake<br>(Q3 vs. Q1)                            | 0.88<br>(0.73 to 1.06) | and/or herceptin<br>use, BMI,<br>smoking,<br>physical activity,<br>energy intake |            |
|-------|----------------------------|-----------|----------------|----------------------|----------|-----|---------------------------------------------------------------------|-------------------------------------------------------------------------------|------------------------|----------------------------------------------------------------------------------|------------|
|       |                            |           |                |                      |          |     |                                                                     | ACS guidelines<br>diet score<br>(3-5 vs. 0-2)                                 | 1.00<br>(0.78 to 1.29) |                                                                                  |            |
|       |                            |           |                |                      |          |     |                                                                     | ACS guidelines<br>diet score<br>(6-9 vs. 0-2)                                 | 1.06<br>(0.79 to 1.42) |                                                                                  |            |
|       |                            |           |                |                      |          |     |                                                                     | Fruit and<br>vegetable intake Breast cancer-specific<br>(Q3 vs. Q1) mortality | 1.00<br>(0.66 to 1.50) |                                                                                  |            |
|       |                            |           |                |                      |          |     |                                                                     | Total grain<br>intake<br>(Q3 vs. Q1)                                          | 1.07<br>(0.79 to 1.46) |                                                                                  |            |
|       |                            |           |                |                      |          |     |                                                                     | Red and<br>processed meat<br>intake<br>(Q3 vs. Q1)                            | 1.10<br>(0.80 to 1.52) |                                                                                  |            |
|       |                            |           |                |                      |          |     |                                                                     | ACS guidelines<br>diet score<br>(3-5 vs. 0-2)                                 | 1.00<br>(0.81 to 1.23) |                                                                                  |            |
|       |                            |           |                |                      |          |     | 2,152<br>(Total<br>death<br>=640; BC-<br>specific<br>death<br>=192) | ACS guidelines<br>diet score<br>(6-9 vs. 0-2)                                 | 0.93<br>(0.73 to 1.18) |                                                                                  |            |
|       |                            |           | Postdiagnostic |                      |          |     |                                                                     | Fruit and<br>vegetable intake<br>(Q3 vs. Q1)                                  | 1.03<br>(0.80 to 1.33) | All-cause mortality                                                              |            |
|       |                            |           |                |                      |          |     |                                                                     | Total grain<br>intake<br>(Q3 vs. Q1)                                          | 1.09<br>(0.86 to 1.38) |                                                                                  |            |
| Study | Project (follow-up period) | Countries | Diagnostic     | Menopausal<br>status | BC stage | Age | Sample<br>size (n)                                                  | Exposures                                                                     | Outcomes               | HR/RR<br>(95% CIs)                                                               | Covariates |

|                      |                                                                      |               |                |   |         |                                                                  |                                           |                                  |                        |                                                                                                                                                                      |  |
|----------------------|----------------------------------------------------------------------|---------------|----------------|---|---------|------------------------------------------------------------------|-------------------------------------------|----------------------------------|------------------------|----------------------------------------------------------------------------------------------------------------------------------------------------------------------|--|
|                      |                                                                      |               |                |   |         |                                                                  | Red and processed meat intake (Q3 vs. Q1) |                                  | 0.64<br>(0.49 to 0.84) |                                                                                                                                                                      |  |
|                      |                                                                      |               |                |   |         |                                                                  | ACS guidelines diet score (3-5 vs. 0-2)   |                                  | 1.45<br>(0.95 to 2.20) |                                                                                                                                                                      |  |
|                      |                                                                      |               |                |   |         |                                                                  | ACS guidelines diet score (6-9 vs. 0-2)   |                                  | 1.44<br>(0.90 to 2.30) |                                                                                                                                                                      |  |
|                      |                                                                      |               |                |   |         |                                                                  | Fruit and vegetable intake (Q3 vs. Q1)    | Breast cancer-specific mortality | 1.31<br>(0.83 to 2.06) |                                                                                                                                                                      |  |
|                      |                                                                      |               |                |   |         |                                                                  | Total grain intake (Q3 vs. Q1)            |                                  | 1.24<br>(0.81 to 1.88) |                                                                                                                                                                      |  |
|                      |                                                                      |               |                |   |         |                                                                  | Red and processed meat intake (Q3 vs. Q1) |                                  | 0.88<br>(0.54 to 1.43) |                                                                                                                                                                      |  |
|                      |                                                                      |               |                |   |         |                                                                  | Natural products supplements              | All-cause mortality              | 0.95<br>(0.67 to 1.35) | Race/ethnicity, BMI, stage of disease, breast cancer treatment, tamoxifen use, Charlson comorbidity score, weekly MET-hours of sport, recreational physical activity |  |
| 2016<br>Neuhouser ML | Health, eating activity and lifestyle study (HEAL; median 4.5 years) | United States | Postdiagnostic | - | I-III A | Mean 57.9 years<br>707 (Total death =149; BC-specific death =70) | Natural products supplements              | Breast cancer-specific mortality | 1.15<br>(0.69 to 1.94) |                                                                                                                                                                      |  |

| Study          | Project (follow-up period)                                        | Countries     | Diagnostic    | Menopausal status              | BC stage | Age             | Sample size (n)                                                          | Exposures                                                  | Outcomes                         | HR/RR (95% CIs)     | Covariates                                                                                                                                                                                                |
|----------------|-------------------------------------------------------------------|---------------|---------------|--------------------------------|----------|-----------------|--------------------------------------------------------------------------|------------------------------------------------------------|----------------------------------|---------------------|-----------------------------------------------------------------------------------------------------------------------------------------------------------------------------------------------------------|
| 2016 Tao MH    | Western New York exposure and breast cancer (WEB; mean 7.3 years) | United States | Prediagnostic | Premenopausal + Postmenopausal | I-IV     | Mean 58.4 years | 1,170 (Total death =170; BC-specific death =100)                         | Dietary calcium intake (>858.13 g/day vs. <558.27 g/day)   | All-cause mortality              | 0.84 (0.49 to 1.45) | age at diagnosis, race, education, BMI, physical activity, menopausal status, TNM, radiotherapy, tamoxifen therapy, ER status, intakes of total energy and total vitamin D, calcium and magnesium intakes |
|                |                                                                   |               |               |                                |          |                 |                                                                          | Dietary magnesium intake (>268.15 g/day vs. <193.64 g/day) |                                  | 0.50 (0.28 to 0.90) |                                                                                                                                                                                                           |
|                |                                                                   |               |               |                                |          |                 |                                                                          | Dietary calcium intake (>858.13 g/day vs. <558.27 g/day)   | Breast cancer-specific mortality | 1.31 (0.63 to 2.76) |                                                                                                                                                                                                           |
|                |                                                                   |               |               |                                |          |                 |                                                                          | Dietary magnesium intake (>268.15 g/day vs. <193.64 g/day) |                                  | 0.70 (0.33 to 1.49) |                                                                                                                                                                                                           |
| 2017 Holmes MD | Nurses' health study (NHS; 1976-2004 through 2010)                | United States | Prediagnostic | Premenopausal + Postmenopausal | I-III    | 30 to 55 years  | 6,348 (Total death =1,847; BC-specific death =919; BC recurrence =1,046) | Total protein (Q5 vs. Q1)                                  | Breast cancer recurrence         | 0.84 (0.69 to 1.03) | age at diagnosis, time since diagnosis, energy intake, BMI, weight change, age at first birth and parity, oral contraceptive use,                                                                         |
|                |                                                                   |               |               |                                |          |                 |                                                                          | Animal protein (Q5 vs. Q1)                                 |                                  | 0.74 (0.61 to 0.91) |                                                                                                                                                                                                           |
|                |                                                                   |               |               |                                |          |                 |                                                                          | Vegetable protein (Q5 vs. Q1)                              |                                  | 1.29 (1.05 to 1.59) |                                                                                                                                                                                                           |
|                |                                                                   |               |               |                                |          |                 |                                                                          | Essential amino acids (Q5 vs. Q1)                          |                                  | 0.86 (0.71 to 1.05) |                                                                                                                                                                                                           |
|                |                                                                   |               |               |                                |          |                 |                                                                          | Branched-chain amino acids (Q5 vs. Q1)                     |                                  | 0.82 (0.68 to 1.00) |                                                                                                                                                                                                           |
| Study          | Project (follow-up period)                                        | Countries     | Diagnostic    | Menopausal status              | BC stage | Age             | Sample size (n)                                                          | Exposures                                                  | Outcomes                         | HR/RR (95% CIs)     | Covariates                                                                                                                                                                                                |

|                    |                                                                |                  |               |                                           |                |                       |                                                                    | Red meat<br>(Q5 vs. Q1)                             | 1.03<br>(0.83 to 1.29)              | menopausal<br>status and               |                                                                                                                                |
|--------------------|----------------------------------------------------------------|------------------|---------------|-------------------------------------------|----------------|-----------------------|--------------------------------------------------------------------|-----------------------------------------------------|-------------------------------------|----------------------------------------|--------------------------------------------------------------------------------------------------------------------------------|
|                    |                                                                |                  |               |                                           |                |                       |                                                                    | Poultry<br>(Q5 vs. Q1)                              | 0.85<br>(0.69 to 1.05)              | hormone therapy                        |                                                                                                                                |
|                    |                                                                |                  |               |                                           |                |                       |                                                                    | Fish (Q5 vs. Q1)                                    | 0.93<br>(0.76 to 1.15)              | use, aspirin use,<br>alcohol, smoking, |                                                                                                                                |
|                    |                                                                |                  |               |                                           |                |                       |                                                                    | High-fat dairy<br>(Q5 vs. Q1)                       | 1.09<br>(0.88 to 1.35)              | physical activity,<br>tumor stage,     |                                                                                                                                |
|                    |                                                                |                  |               |                                           |                |                       |                                                                    | Low-fat dairy<br>(Q5 vs. Q1)                        | 0.84<br>(0.69 to 1.04)              | radiation<br>treatment, other          |                                                                                                                                |
|                    |                                                                |                  |               |                                           |                |                       |                                                                    |                                                     |                                     | treatment,<br>calendar year            |                                                                                                                                |
| 2017 Zeinomar<br>N | The breast cancer family<br>registry (BCFR; mean 9.1<br>years) | United<br>States | Prediagnostic | Premenopausa<br>l +<br>Postmenopaus<br>al | Invasive<br>BC | Mean<br>54.6<br>years | 1,116<br>(Total<br>death<br>=211; BC-<br>specific<br>death<br>=58) | Alcohol<br>(>3 drinks/week<br>vs. Non-<br>drinkers) | All-cause mortality                 | 1.16<br>(0.85 to 1.58)                 | age at baseline,<br>BMI, ethnicity,<br>menopausal<br>status, age at<br>menarche, HRT,<br>and cigarette<br>smoking              |
|                    |                                                                |                  |               |                                           |                |                       |                                                                    | Alcohol<br>(>3 drinks/week<br>vs. Non-<br>drinkers) | Breast cancer-specific<br>mortality | 0.96<br>(0.49 to 1.89)                 | age at baseline,<br>BMI, ethnicity,<br>physical activity,<br>age at first live<br>birth,                                       |
| Study              | Project (follow-up period)                                     | Countries        | Diagnostic    | Menopausal<br>status                      | BC stage       | Age                   | Sample<br>size (n)                                                 | Exposures                                           | Outcomes                            | HR/RR<br>(95% CIs)                     | Covariates                                                                                                                     |
|                    |                                                                |                  |               |                                           |                |                       |                                                                    |                                                     |                                     |                                        | menopause<br>status, oral<br>contraceptive<br>use, education<br>level, breast<br>feeding duration,<br>and cigarette<br>smoking |



| 2017 Zhang FF    | The breast cancer family registry (BCFR; median 9.4 years) | United States and Canada | Prediagnostic + Postdiagnostic | Premenopausal + Postmenopausal | Invasive BC | Mean 51.8 years | 6,235 (Total death =1,224)                     | Isoflavone (Q4 vs. Q1) | All-cause mortality              | 0.79 (0.64 to 0.97) | age, study site, total calorie intake, race, education, total fiber intake, HEI-2010, treatment type, recreational physical activity, BMI, alcohol use, smoking status |
|------------------|------------------------------------------------------------|--------------------------|--------------------------------|--------------------------------|-------------|-----------------|------------------------------------------------|------------------------|----------------------------------|---------------------|------------------------------------------------------------------------------------------------------------------------------------------------------------------------|
|                  |                                                            |                          | Prediagnostic                  |                                |             |                 | 4,769 (Total death =963)                       | Isoflavone (Q4 vs. Q1) |                                  | 0.84 (0.66 to 1.06) |                                                                                                                                                                        |
|                  |                                                            |                          | Postdiagnostic                 |                                |             |                 | 1,466 (Total death =261)                       | Isoflavone (Q4 vs. Q1) |                                  | 0.65 (0.41 to 1.00) |                                                                                                                                                                        |
| 2017 Zucchetto A | Italian women cohort (median 12.6 years)                   | Italy                    | Prediagnostic                  | Premenopausal + Postmenopausal | I-IV        | -               | 1,453 (Total death =503; BC-specific)          | DII (T3 vs. T1)        | All-cause mortality              | 1.00 (0.78 to 1.28) | Area of residence, calendar year of diagnosis, age at                                                                                                                  |
| Study            | Project (follow-up period)                                 | Countries                | Diagnostic                     | Menopausal status              | BC stage    | Age             | Sample size (n)                                | Exposures              | Outcomes                         | HR/RR (95% CIs)     | Covariates                                                                                                                                                             |
|                  |                                                            |                          |                                |                                |             |                 | death =398)                                    | DII (T3 vs. T1)        | Breast cancer-specific mortality | 0.97 (0.73 to 1.27) |                                                                                                                                                                        |
|                  |                                                            |                          |                                |                                |             |                 | 553 (Total death =152; BC-specific death =137) | DII (T3 vs. T1)        | All-cause mortality              | 0.84 (0.52 to 1.34) | diagnosis, education, menopausal status, smoking habit, BMI, total energy intake, hormone receptor status, TNM tumour stage                                            |
|                  |                                                            |                          |                                | Premenopausal                  |             |                 | 900 (Total death =351; BC-specific death =261) | DII (T3 vs. T1)        | Breast cancer-specific mortality | 0.76 (0.46 to 1.26) |                                                                                                                                                                        |
|                  |                                                            |                          |                                |                                |             |                 |                                                | DII (T3 vs. T1)        | All-cause mortality              | 1.05 (0.78 to 1.40) |                                                                                                                                                                        |
|                  |                                                            |                          |                                | Postmenopausal                 |             |                 |                                                | DII (T3 vs. T1)        | Breast cancer-specific mortality | 1.07 (0.77 to 1.51) |                                                                                                                                                                        |

| 2018 Furrer D  | The Centre des Maladies du Sein Deschenes-Fabia (CMSDF; median 7.4 years) | Canada    | Prediagnostic  | -                              | Nonmetastatic HER2-positive BC | -               | 236 (BC recurrence=66)               | Wine consumption (>2 drinks/week vs. 0-2 drinks/week)<br>Beer consumption (>2 drinks/week vs. 0-2 drinks/week) | Disease-free survival                                   | 0.42<br>(0.18 to 0.95)<br><br>1.60<br>(0.47 to 5.47) | age at diagnosis, BMI, stage, adjuvant endocrine therapy, and radiotherapy                                                                                                   |
|----------------|---------------------------------------------------------------------------|-----------|----------------|--------------------------------|--------------------------------|-----------------|--------------------------------------|----------------------------------------------------------------------------------------------------------------|---------------------------------------------------------|------------------------------------------------------|------------------------------------------------------------------------------------------------------------------------------------------------------------------------------|
| 2018 Madden JM | The National cancer registry Ireland (NCRI; mean 2.3 years)               | Ireland   | Postdiagnostic | -                              | I-III                          | Mean 67 years   | 5,417 (BC-specific death =806)       | Vitamin D supplements (User vs. Non-user)                                                                      | Breast cancer-specific mortality                        | 0.80<br>(0.64 to 0.99)                               | age at diagnosis, smoking status, comorbidity score, tumour stage, tumour                                                                                                    |
| Study          | Project (follow-up period)                                                | Countries | Diagnostic     | Menopausal status              | BC stage                       | Age             | Sample size (n)                      | Exposures                                                                                                      | Outcomes                                                | HR/RR (95% CIs)                                      | Covariates                                                                                                                                                                   |
|                |                                                                           |           |                |                                |                                |                 |                                      |                                                                                                                |                                                         |                                                      | grade, ER, PR and HER 2-receptor status, bisphosphonate in year prior and post diagnosis, chemotherapy, anti-oestrogen therapy, NSAID, statins, anti-diabetic medication use |
| 2019 Minami Y  | Miyagi cancer center hospital (MCCH; median 8.6 years)                    | Japan     | Prediagnostic  | Premenopausal + Postmenopausal | I-IV                           | Mean 57.2 years | 1,420 (Total death =261; BC-specific | Alcohol drinking (Current vs. Never)<br>Alcohol drinking                                                       | All-cause mortality<br>Breast cancer-specific mortality | 0.76<br>(0.53 to 1.08)<br><br>0.70<br>(0.47 to 1.04) | age, year of diagnosis, stage, hormone receptor, menopausal status, referral                                                                                                 |



|       |                            |           |            |                   |          |     |                 | (200 g/day)                           |                                  | (0.75 to 1.07)         |            |
|-------|----------------------------|-----------|------------|-------------------|----------|-----|-----------------|---------------------------------------|----------------------------------|------------------------|------------|
|       |                            |           |            |                   |          |     |                 | Cheese                                |                                  | 1.16                   |            |
|       |                            |           |            |                   |          |     |                 | (50 g/day)                            |                                  | (0.97 to 1.39)         |            |
|       |                            |           |            |                   |          |     |                 | Total whole grain products (50 g/day) | Breast cancer-specific mortality | 1.06<br>(0.97 to 1.17) |            |
| Study | Project (follow-up period) | Countries | Diagnostic | Menopausal status | BC stage | Age | Sample size (n) | Exposures                             | Outcomes                         | HR/RR (95% CIs)        | Covariates |
|       |                            |           |            |                   |          |     |                 | Rye bread (50 g/day)                  |                                  | 1.11<br>(0.96 to 1.29) |            |
|       |                            |           |            |                   |          |     |                 | Whole grain bread (40 g/day)          |                                  | 1.04<br>(0.94 to 1.15) |            |
|       |                            |           |            |                   |          |     |                 | Oatmeal/muesli (50 g/day)             |                                  | 0.99<br>(0.73 to 1.35) |            |
|       |                            |           |            |                   |          |     |                 | Total dairy products (200 g/day)      |                                  | 0.98<br>(0.91 to 1.06) |            |
|       |                            |           |            |                   |          |     |                 | Milk (200 g/day)                      |                                  | 0.99<br>(0.91 to 1.08) |            |
|       |                            |           |            |                   |          |     |                 | Yogurt (200 g/day)                    |                                  | 0.86<br>(0.69 to 1.08) |            |
|       |                            |           |            |                   |          |     |                 | Cheese (50 g/day)                     |                                  | 1.18<br>(0.94 to 1.47) |            |
|       |                            |           |            |                   |          |     |                 | Total whole grain products (50 g/day) |                                  | 1.03<br>(0.94 to 1.13) |            |
|       |                            |           |            |                   |          |     |                 | Rye bread (50 g/day)                  |                                  | 1.04<br>(0.89 to 1.20) |            |
|       |                            |           |            |                   |          |     |                 | Whole grain bread (40 g/day)          | Breast cancer recurrence         | 1.04<br>(0.94 to 1.15) |            |
|       |                            |           |            |                   |          |     |                 | Oatmeal/muesli (50 g/day)             |                                  | 0.90<br>(0.66 to 1.22) |            |
|       |                            |           |            |                   |          |     |                 | Total dairy products (200 g/day)      |                                  | 0.98<br>(0.91 to 1.06) |            |

|                |                            |           |            |                   |          |     |                                  | Milk (200 g/day)                                     |                                          | 0.96<br>(0.89 to 1.05) |                        |  |  |
|----------------|----------------------------|-----------|------------|-------------------|----------|-----|----------------------------------|------------------------------------------------------|------------------------------------------|------------------------|------------------------|--|--|
|                |                            |           |            |                   |          |     |                                  | Yogurt<br>(200 g/day)                                |                                          | 1.02<br>(0.83 to 1.27) |                        |  |  |
|                |                            |           |            |                   |          |     |                                  | Cheese<br>(50 g/day)                                 |                                          | 1.17<br>(0.94 to 1.45) |                        |  |  |
| Postdiagnostic |                            |           |            |                   |          |     |                                  | 977<br>(Total death -<br>175; BC-<br>specific death) | Total whole grain products<br>(50 g/day) | All-cause mortality    | 0.99<br>(0.88 to 1.12) |  |  |
| Study          | Project (follow-up period) | Countries | Diagnostic | Menopausal status | BC stage | Age | Sample size (n)                  | Exposures                                            | Outcomes                                 | HR/RR<br>(95% CIs)     | Covariates             |  |  |
|                |                            |           |            |                   |          |     |                                  | Rye bread<br>(50 g/day)                              |                                          |                        | 1.21<br>(0.98 to 1.47) |  |  |
|                |                            |           |            |                   |          |     |                                  | Whole grain bread (40 g/day)                         |                                          |                        | 0.95<br>(0.81 to 1.10) |  |  |
|                |                            |           |            |                   |          |     |                                  | Oatmeal/muesli<br>(50 g/day)                         |                                          |                        | 0.75<br>(0.53 to 1.07) |  |  |
|                |                            |           |            |                   |          |     |                                  | Total dairy products<br>(200 g/day)                  |                                          |                        | 0.99<br>(0.90 to 1.09) |  |  |
|                |                            |           |            |                   |          |     | =121; BC<br>recurren<br>ce =152) | Milk (200 g/day)                                     |                                          |                        | 1.00<br>(0.90 to 1.12) |  |  |
|                |                            |           |            |                   |          |     |                                  | Yogurt<br>(200 g/day)                                |                                          |                        | 0.93<br>(0.74 to 1.16) |  |  |
|                |                            |           |            |                   |          |     |                                  | Cheese<br>(50 g/day)                                 |                                          |                        | 1.09<br>(0.70 to 1.47) |  |  |
|                |                            |           |            |                   |          |     |                                  | Total whole grain products<br>(50 g/day)             | Breast cancer-specific mortality         |                        | 1.05<br>(0.92 to 1.21) |  |  |
|                |                            |           |            |                   |          |     |                                  | Rye bread<br>(50 g/day)                              |                                          |                        | 1.34<br>(1.06 to 1.70) |  |  |

|       |                            |           |            |                      |          |     |                    | Whole grain<br>bread (40 g/day)             |                             | 0.97<br>(0.81 to 1.15) |            |
|-------|----------------------------|-----------|------------|----------------------|----------|-----|--------------------|---------------------------------------------|-----------------------------|------------------------|------------|
|       |                            |           |            |                      |          |     |                    | Oatmeal/muesli<br>(50 g/day)                |                             | 0.82<br>(0.55 to 1.22) |            |
|       |                            |           |            |                      |          |     |                    | Total dairy<br>products<br>(200 g/day)      |                             | 0.99<br>(0.87 to 1.12) |            |
|       |                            |           |            |                      |          |     |                    | Milk (200 g/day)                            |                             | 1.02<br>(0.89 to 1.17) |            |
|       |                            |           |            |                      |          |     |                    | Yogurt<br>(200 g/day)                       |                             | 0.84<br>(0.60 to 1.18) |            |
|       |                            |           |            |                      |          |     |                    | Cheese<br>(50 g/day)                        |                             | 0.95<br>(0.66 to 1.37) |            |
|       |                            |           |            |                      |          |     |                    | Total whole<br>grain products<br>(50 g/day) | Breast cancer<br>recurrence | 0.98<br>(0.83 to 1.15) |            |
|       |                            |           |            |                      |          |     |                    | Rye bread<br>(50 g/day)                     |                             | 1.27<br>(0.97 to 1.66) |            |
| Study | Project (follow-up period) | Countries | Diagnostic | Menopausal<br>status | BC stage | Age | Sample<br>size (n) | Exposures                                   | Outcomes                    | HR/RR<br>(95% CIs)     | Covariates |
|       |                            |           |            |                      |          |     |                    | Whole grain<br>bread (40 g/day)             |                             | 0.83<br>(0.66 to 1.04) |            |
|       |                            |           |            |                      |          |     |                    | Oatmeal/muesli<br>(50 g/day)                |                             | 0.93<br>(0.62 to 1.40) |            |
|       |                            |           |            |                      |          |     |                    | Total dairy<br>products<br>(200 g/day)      |                             | 0.93<br>(0.80 to 1.07) |            |
|       |                            |           |            |                      |          |     |                    | Milk (200 g/day)                            |                             | 0.92<br>(0.78 to 1.08) |            |
|       |                            |           |            |                      |          |     |                    | Yogurt<br>(200 g/day)                       |                             | 0.92<br>(0.67 to 1.25) |            |
|       |                            |           |            |                      |          |     |                    | Cheese<br>(50 g/day)                        |                             | 1.23<br>(0.85 to 1.78) |            |

| 2020 Madden JM | National cancer registry Ireland (NCRI; median 4.2 years)       | Ireland   | Postdiagnostic | -                              | I-III    | Mean 67 years   | 2,570 (Total death =386)     | Vitamin D supplements (User vs. Non-user)      | All-cause mortality | 0.84 (0.73 to 0.99)                        | Age, smoking status, comorbidity score, tumor stage and grade, estrogen receptor, progesterone receptor, HER2 status, use of nonsteroidal antiinflammatory drugs, statins, antidiabetic medication during the year before |
|----------------|-----------------------------------------------------------------|-----------|----------------|--------------------------------|----------|-----------------|------------------------------|------------------------------------------------|---------------------|--------------------------------------------|---------------------------------------------------------------------------------------------------------------------------------------------------------------------------------------------------------------------------|
| Study          | Project (follow-up period)                                      | Countries | Diagnostic     | Menopausal status              | BC stage | Age             | Sample size (n)              | Exposures                                      | Outcomes            | HR/RR (95% CIs)                            | Covariates                                                                                                                                                                                                                |
|                |                                                                 |           |                |                                |          |                 |                              |                                                |                     |                                            | diagnosis, receipt of chemotherapy, antiestrogen therapy during the year after diagnosis, bisphosphonate use during the year before diagnosis, bisphosphonate use after diagnosis                                         |
| 2020 Wang F    | Shanghai breast cancer survival study (SBCSS; median 5.3 years) | China     | Postdiagnostic | Premenopausal + Postmenopausal | I-IV     | Mean 58.9 years | 3,450 (Total death =374; BC- | CHFP-2007 (Q4 vs. Q1)<br>CHFP-2016 (Q4 vs. Q1) | All-cause mortality | 0.66 (0.48 to 0.89)<br>0.75 (0.55 to 1.01) | Age, total energy intake, income, education, marriage,                                                                                                                                                                    |

|             |                                                                                        |               |                |                   |          |               |                                                  |                      |                                  |                     |                                                                                                                                                                                                                                                                                                       |
|-------------|----------------------------------------------------------------------------------------|---------------|----------------|-------------------|----------|---------------|--------------------------------------------------|----------------------|----------------------------------|---------------------|-------------------------------------------------------------------------------------------------------------------------------------------------------------------------------------------------------------------------------------------------------------------------------------------------------|
|             |                                                                                        |               |                |                   |          |               |                                                  | specific death =228) | DASH (Q4 vs. Q1)                 | 0.66 (0.49 to 0.91) | menopausal status at diagnosis, BMI, physical activity, ER, PR, HER2, TNM stages, comorbidity,                                                                                                                                                                                                        |
|             |                                                                                        |               |                |                   |          |               |                                                  |                      | HEI-2015 (Q4 vs. Q1)             | 0.79 (0.57 to 1.10) |                                                                                                                                                                                                                                                                                                       |
|             |                                                                                        |               |                |                   |          |               |                                                  |                      | CHFP-2007 (Q4 vs. Q1)            | 0.64 (0.44 to 0.93) |                                                                                                                                                                                                                                                                                                       |
|             |                                                                                        |               |                |                   |          |               |                                                  |                      | CHFP-2016 (Q4 vs. Q1)            | 0.67 (0.45 to 0.99) |                                                                                                                                                                                                                                                                                                       |
|             |                                                                                        |               |                |                   |          |               |                                                  |                      | DASH (Q4 vs. Q1)                 | 0.60 (0.40 to 0.90) |                                                                                                                                                                                                                                                                                                       |
|             |                                                                                        |               |                |                   |          |               |                                                  |                      | HEI-2015 (Q4 vs. Q1)             | 0.89 (0.59 to 1.33) |                                                                                                                                                                                                                                                                                                       |
| Study       | Project (follow-up period)                                                             | Countries     | Diagnostic     | Menopausal status | BC stage | Age           | Sample size (n)                                  | Exposures            | Outcomes                         | HR/RR (95% CIs)     | Covariates                                                                                                                                                                                                                                                                                            |
|             |                                                                                        |               |                |                   |          |               |                                                  |                      |                                  |                     | chemotherapy, radiotherapy, immunotherapy                                                                                                                                                                                                                                                             |
|             |                                                                                        |               |                |                   |          |               |                                                  | E-DII (T3 vs. T1)    | All-cause mortality              | 1.34 (1.01 to 1.81) | Age at diagnosis, years from breast cancer diagnosis to DHQ completion, stage, adjusted for total energy intake, BMI, trial arm, race, marital status, income, educational level, smoking status, HRT, history of diabetes, physical activity, estrogen receptor status, progesterone receptor status |
| 2020 Wang K | The prostate, lung, colorectal, and ovarian cancer screening (PLCO; median 14.6 years) | United States | Postdiagnostic | Postmenopausal    | I-III A  | Mean 65 years | 1,064 (Total death =296; BC-specific death =100) | E-DII (T3 vs. T1)    | Breast cancer-specific moratlity | 1.47 (0.89 to 2.43) |                                                                                                                                                                                                                                                                                                       |



| Study     | Project (follow-up period)                                 | Countries     | Diagnostic                     | Menopausal status              | BC stage | Age           | Sample size (n)                                                     | Exposures        | Outcomes                         | HR/RR (95% CIs)     | Covariates                                                                                                                                                                                                                                                                                                     |
|-----------|------------------------------------------------------------|---------------|--------------------------------|--------------------------------|----------|---------------|---------------------------------------------------------------------|------------------|----------------------------------|---------------------|----------------------------------------------------------------------------------------------------------------------------------------------------------------------------------------------------------------------------------------------------------------------------------------------------------------|
| 2020 Wu T | Women's healthy eating and living (WHEL; median 7.3 years) | United States | Prediagnostic + Postdiagnostic | Premenopausal + Postmenopausal | I-III A  | Mean 50 years | 2,950 (Total death =295; BC specific death =249; BC recurrence=490) | PRAL (Q4 vs. Q1) | All-cause mortality              | 1.30 (0.87 to 1.94) | age at diagnosis, race/ethnicity, education level, intervention group, menopausal status at baseline, total calorie intake, alcohol intake, physical activity, BMI, number of comorbidities, tumor stage, tumor size, estrogen and progesterone receptor status, tamoxifen use, radiotherapy, and chemotherapy |
|           |                                                            |               |                                |                                |          |               |                                                                     | NEAP (Q4 vs. Q1) |                                  | 1.54 (1.04 to 2.29) |                                                                                                                                                                                                                                                                                                                |
|           |                                                            |               |                                |                                |          |               |                                                                     | PRAL (Q4 vs. Q1) | Breast cancer-specific mortality | 1.27 (0.83 to 1.94) |                                                                                                                                                                                                                                                                                                                |
|           |                                                            |               |                                |                                |          |               |                                                                     | NEAP (Q4 vs. Q1) |                                  | 1.52 (1.01 to 2.32) |                                                                                                                                                                                                                                                                                                                |
|           |                                                            |               |                                |                                |          |               |                                                                     | PRAL (Q4 vs. Q1) | Breast cancer recurrence         | 1.09 (0.83 to 1.43) |                                                                                                                                                                                                                                                                                                                |
|           |                                                            |               |                                |                                |          |               |                                                                     | NEAP (Q4 vs. Q1) |                                  | 1.15 (0.88 to 1.50) |                                                                                                                                                                                                                                                                                                                |

Abbreviations: BC, breast cancer; BMI, body mass index; HRT, hormone replacement therapy; ER, estrogen receptor; PR, progesterone receptor; TNM, tumor-nodes-metastases; HEI, health eating index; AHEI, alternate health eating index; DQIR, diet quality index-revised; RFS, recommended food score; aMED, alternate mediterranean diet score; WCRF/AICR, world cancer research fund and the American institute for cancer research; DASH, dietary approaches to stop hypertension; AJCC, the American joint committee on cancer; ACS, American cancer society; MET, metabolic equivalent of task; DII, dietary inflammatory index; CHFP, Chinese food pagoda; E-DII, energy-adjusted dietary inflammatory index; PRAL, the potential renal acid load; NEAP, the net endogenous acid production.

**Table S2.** NewCastle-Ottawa quality assessment scale for cohort studies in the systematic review and meta-analysis.

| Study | Selection                                |                                    | Comparability             |                         |               | Outcomes           |                       |                                  | Total score |
|-------|------------------------------------------|------------------------------------|---------------------------|-------------------------|---------------|--------------------|-----------------------|----------------------------------|-------------|
|       | Representativeness of the exposed cohort | Selection of the nonexposed cohort | Ascertainment of exposure | Outcome of interest was | Age or gender | Additional factors | Assessment of outcome | Follow-up length                 |             |
|       |                                          |                                    |                           |                         |               |                    |                       | Adequacy of follow-up of cohorts |             |

|                     | not present at<br>start |   |   |   |   |   |   |   |   |
|---------------------|-------------------------|---|---|---|---|---|---|---|---|
| 1991 Ewertz M       | 1                       | 1 | 0 | 1 | 1 | 1 | 1 | 1 | 8 |
| 1993 Rohan TE       | 1                       | 1 | 1 | 1 | 1 | 1 | 1 | 0 | 8 |
| 1994 Jain M         | 1                       | 1 | 1 | 1 | 1 | 1 | 1 | 1 | 9 |
| 1998 Hebert JR      | 1                       | 1 | 0 | 1 | 1 | 1 | 1 | 1 | 8 |
| 1999 Holmes MD      | 0                       | 1 | 0 | 1 | 1 | 1 | 1 | 1 | 7 |
| 2003 Fleischauer AT | 1                       | 1 | 0 | 1 | 1 | 1 | 1 | 1 | 8 |
| 2004 Borugain MJ    | 1                       | 1 | 0 | 1 | 1 | 1 | 1 | 1 | 8 |
| 2005 Boyapati SM    | 1                       | 1 | 1 | 1 | 1 | 1 | 1 | 0 | 8 |
| 2005 Kroenke CH     | 0                       | 1 | 0 | 1 | 1 | 1 | 1 | 0 | 6 |
| 2006 Cui Y          | 1                       | 1 | 1 | 1 | 1 | 1 | 0 | 0 | 7 |
| 2006 McEligot AJ    | 1                       | 1 | 0 | 1 | 1 | 1 | 1 | 1 | 8 |
| 2006 Fink BN        | 1                       | 1 | 1 | 1 | 1 | 1 | 1 | 1 | 9 |
| 2007 Fink BN        | 1                       | 1 | 1 | 1 | 1 | 1 | 1 | 1 | 9 |
| 2008 Xu X           | 1                       | 1 | 1 | 1 | 1 | 1 | 1 | 0 | 8 |
| 2009 Guha N         | 1                       | 1 | 0 | 1 | 1 | 1 | 1 | 1 | 8 |
| 2009 Kwan ML        | 1                       | 1 | 0 | 1 | 1 | 1 | 1 | 0 | 7 |
| 2009 Shu XO         | 1                       | 1 | 1 | 1 | 1 | 1 | 0 | 1 | 8 |
| 2010 Hellmann SS    | 1                       | 1 | 1 | 1 | 1 | 1 | 1 | 1 | 9 |
| 2010 Kang X         | 1                       | 1 | 1 | 1 | 1 | 1 | 1 | 0 | 8 |
| 2010 Kwan ML        | 1                       | 1 | 0 | 1 | 1 | 1 | 1 | 0 | 7 |
| 2011 Beasley JM     | 1                       | 1 | 0 | 1 | 1 | 1 | 1 | 0 | 7 |
| 2011 Belle FN       | 1                       | 1 | 1 | 1 | 1 | 1 | 1 | 1 | 9 |
| 2011 Caan BJ        | 1                       | 1 | 0 | 1 | 1 | 1 | 1 | 0 | 7 |
| 2011 George SM      | 1                       | 1 | 0 | 1 | 0 | 1 | 1 | 1 | 7 |
| 2011 Kim EHJ        | 0                       | 1 | 0 | 1 | 1 | 1 | 1 | 1 | 7 |
| 2011 Kwan ML        | 1                       | 1 | 0 | 1 | 1 | 1 | 1 | 1 | 8 |
| 2011 Nechuta S      | 1                       | 1 | 1 | 1 | 1 | 1 | 0 | 0 | 7 |
| 2011 Saquib J       | 1                       | 1 | 0 | 1 | 1 | 1 | 1 | 0 | 7 |
| 2012 Greenlee H     | 1                       | 1 | 0 | 1 | 1 | 1 | 1 | 0 | 7 |
| 2012 Harris HR(a)   | 1                       | 1 | 0 | 1 | 1 | 1 | 1 | 0 | 7 |
| 2012 Harris HR(b)   | 1                       | 1 | 0 | 1 | 1 | 1 | 1 | 0 | 7 |
| 2012 Harris HR(c)   | 1                       | 1 | 0 | 1 | 1 | 1 | 1 | 0 | 7 |

| 2012 Nechuta SJ    | 1                                        | 1                                  | 0                         | 1                                            | 1             | 1                  | 1                     | 1                | 1                                | 8     |
|--------------------|------------------------------------------|------------------------------------|---------------------------|----------------------------------------------|---------------|--------------------|-----------------------|------------------|----------------------------------|-------|
| 2012 Vrieling A    | 1                                        | 1                                  | 0                         | 1                                            | 1             | 1                  | 1                     | 1                | 1                                | 8     |
| 2013 Conroy SM     | 1                                        | 1                                  | 0                         | 1                                            | 1             | 1                  | 1                     | 1                | 1                                | 8     |
| 2013 Holm M        | 1                                        | 1                                  | 0                         | 1                                            | 0             | 1                  | 1                     | 1                | 1                                | 7     |
| Study              | Selection                                |                                    |                           |                                              | Comparability |                    |                       | Outcomes         |                                  | Total |
|                    | Representativeness of the exposed cohort | Selection of the nonexposed cohort | Ascertainment of exposure | Outcome of interest was not present at start | Age or gender | Additional factors | Assessment of outcome | Follow-up length | Adequacy of follow-up of cohorts |       |
| 2013 Inoue-Choi M  | 1                                        | 1                                  | 0                         | 1                                            | 1             | 1                  | 1                     | 1                | 0                                | 7     |
| 2013 Izano MA      | 0                                        | 1                                  | 0                         | 1                                            | 1             | 1                  | 1                     | 1                | 1                                | 7     |
| 2013 Kroenke CH    | 1                                        | 1                                  | 0                         | 1                                            | 1             | 1                  | 1                     | 1                | 0                                | 7     |
| 2013 Kwan ML       | 1                                        | 1                                  | 0                         | 1                                            | 1             | 1                  | 1                     | 1                | 1                                | 8     |
| 2013 Newcomb PA    | 1                                        | 1                                  | 1                         | 1                                            | 1             | 1                  | 1                     | 1                | 1                                | 9     |
| 2013 Poole EM      | 1                                        | 1                                  | 0                         | 1                                            | 1             | 1                  | 1                     | 0                | 1                                | 7     |
| 2013 Vrieling A    | 1                                        | 1                                  | 1                         | 1                                            | 1             | 1                  | 1                     | 1                | 1                                | 9     |
| 2014 George SM     | 1                                        | 1                                  | 1                         | 1                                            | 1             | 1                  | 1                     | 1                | 1                                | 9     |
| 2015 Bao PP        | 1                                        | 1                                  | 1                         | 1                                            | 1             | 1                  | 1                     | 1                | 0                                | 8     |
| 2015 Jeffreys M    | 0                                        | 1                                  | 1                         | 1                                            | 1             | 1                  | 1                     | 0                | 0                                | 6     |
| 2015 Kyro C        | 1                                        | 1                                  | 0                         | 1                                            | 1             | 1                  | 1                     | 1                | 0                                | 7     |
| 2016 McCullough ML | 1                                        | 1                                  | 0                         | 1                                            | 1             | 1                  | 1                     | 1                | 0                                | 7     |
| 2016 Neuhauser ML  | 1                                        | 1                                  | 1                         | 1                                            | 0             | 1                  | 1                     | 0                | 1                                | 7     |
| 2016 Tao MH        | 1                                        | 1                                  | 1                         | 1                                            | 1             | 1                  | 1                     | 1                | 0                                | 8     |
| 2017 Holmes MD     | 0                                        | 1                                  | 0                         | 1                                            | 1             | 1                  | 1                     | 1                | 1                                | 7     |
| 2017 Zeinomar N    | 0                                        | 1                                  | 1                         | 1                                            | 1             | 1                  | 1                     | 1                | 1                                | 8     |
| 2017 Zhang FF      | 0                                        | 1                                  | 0                         | 1                                            | 1             | 1                  | 1                     | 1                | 0                                | 6     |
| 2017 Zucchetto A   | 0                                        | 1                                  | 1                         | 1                                            | 1             | 1                  | 0                     | 1                | 0                                | 6     |
| 2018 Furrer D      | 1                                        | 1                                  | 0                         | 1                                            | 1             | 1                  | 1                     | 1                | 1                                | 8     |
| 2018 Madden JM     | 1                                        | 1                                  | 1                         | 1                                            | 1             | 1                  | 1                     | 0                | 0                                | 7     |
| 2019 Minami Y      | 1                                        | 1                                  | 0                         | 1                                            | 1             | 1                  | 1                     | 1                | 1                                | 8     |
| 2020 Anderson JLM  | 1                                        | 1                                  | 0                         | 1                                            | 1             | 1                  | 1                     | 1                | 1                                | 8     |
| 2020 Madden JM     | 1                                        | 1                                  | 1                         | 1                                            | 1             | 1                  | 1                     | 0                | 0                                | 7     |
| 2020 Wang F        | 1                                        | 1                                  | 1                         | 1                                            | 1             | 1                  | 1                     | 1                | 1                                | 9     |
| 2020 Wang K        | 1                                        | 1                                  | 0                         | 1                                            | 1             | 1                  | 1                     | 1                | 1                                | 8     |
